# Supplementary material for: Time-Series Chlorophyll Fluorescence Imaging Reveals Dynamic Photosynthetic Fingerprints of sos Mutants to Drought Stress
Source: MDPI journal article supplement (doi:10.3390/s19122649), 2019-06-12
Supplement: s1 [file s1]

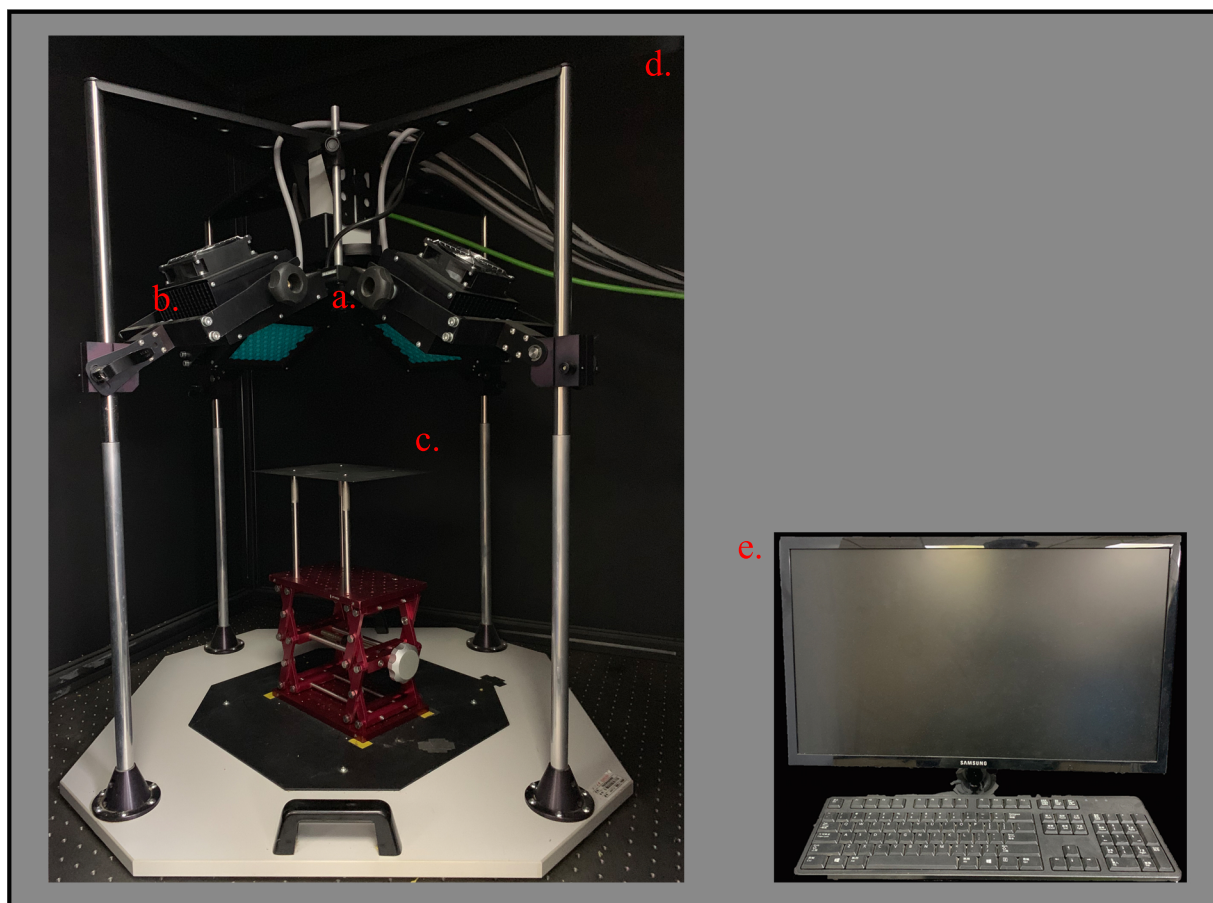

**Fig. S1:** The detailed setting of ChlF imaging system

a. charge-coupled device (CCD) camera with a prime lens (SV-H 1.4/6, VS Technology, Tokyo, Japan); b. Light emitting diode (LED) panels ( $45^\circ$  incident angle); c. Adjustable sample-loading platform; d. Dark environment; e. controlling and monitoring computer.
