# Supplementary material for: Time-Series Chlorophyll Fluorescence Imaging Reveals Dynamic Photosynthetic Fingerprints of sos Mutants to Drought Stress
Source: MDPI journal article supplement (doi:10.3390/s19122649), 2019-06-12
Supplement: s1 [file s1]

## The detailed quenching protocol with major parameter abbreviations and important calculation formulas

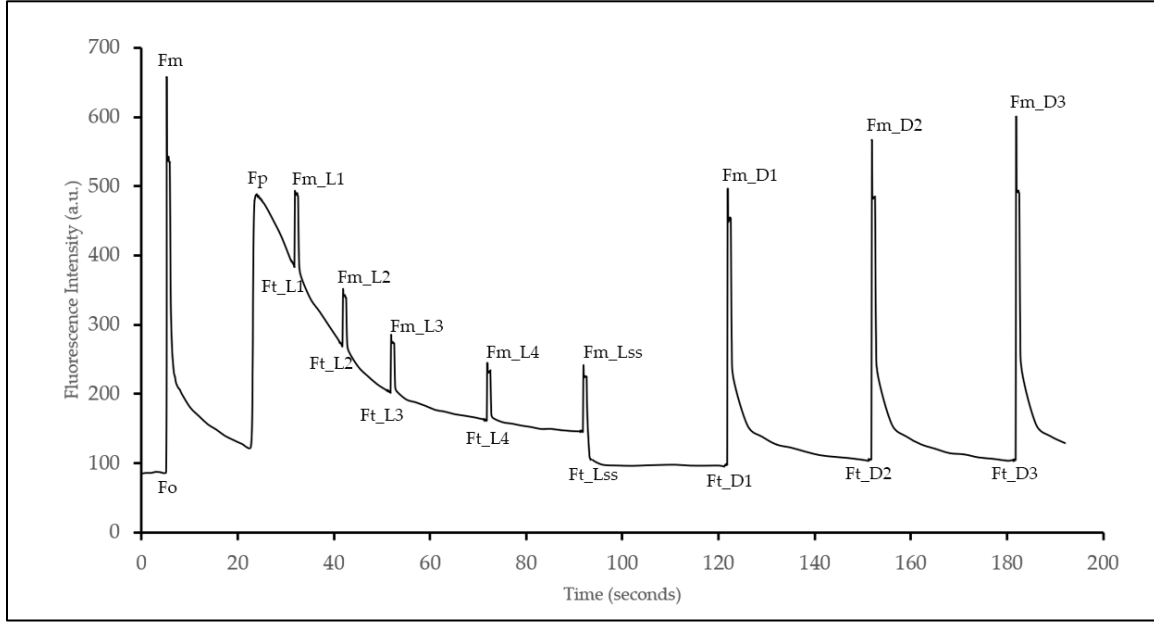

**Fig a.** Detailed quenching protocols

### Abbreviations:

$F_o$ , the minimum fluorescence;  $F_m$ , maximum fluorescence;  $F_{m\_Ln}$ , the maximum fluorescence in light;  $F_{m\_Lss}$ , the steady-state maximum fluorescence in light;  $F_{m\_Dn}$ , the instantaneous maximum fluorescence signals in dark;  $F_p$ , the peak rise fluorescence;  $F_{t\_Ln}$ , the instantaneous fluorescence in light;  $F_{t\_Lss}$ , the steady-state fluorescence in light;  $F_{t\_Dn}$ , the instantaneous fluorescence signals before the saturating flashes;  $F_v$ , variable fluorescence in the steady state;  $F_v$ , variable fluorescence during light adaptation;  $F_v/F_m'$ , the trapping efficiency of PSII;  $F_s/F_o$ , steady-state of chlorophyll fluorescence yield normalized to the minimal fluorescence yield;  $NPQ$ , instantaneous non-photochemical quenching relaxation;  $F_v/F_m$ ,  $(F_m - F_o) / F_m$ , the maximum PSII quantum yield;  $NPQ\_Ln$ ,  $(F_m - F_{m\_Ln}) / F_{m\_Ln}$ , instantaneous non-photochemical quenching in light;  $NPQ\_Lss$ ,  $(F_m - F_{m\_Lss}) / F_{m\_Lss}$ , steady-state non-photochemical quenching;  $q_L$ ,  $(F_q/F_v) / (F_o/F_t)$ , coefficient of photochemical quenching measured the fraction of open PSII centers based on a 'lake' model for PSII;  $q_P$ ,  $(F_m - F_t) / (F_m - F_o)$ , coefficient of photochemical quenching;  $QY$ ,  $(F_m - F_t) / F_m$ , instantaneous PSII quantum yield;  $R_{fd\_Ln}$ ,  $(F_p - F_{t\_Ln}) / F_{t\_Ln}$ , instantaneous fluorescence decline ratio in light;  $qN\_Dn$ ,  $(F_m - F_{m\_Dn}) / (F_m - F_{o\_Dn})$ , coefficient of non-photochemical quenching during dark relaxation;  $qN\_Ln$ ,  $(F_m - F_{m\_Ln}) / (F_m - F_{o\_Ln})$ , coefficient of non-photochemical quenching during light adaptation;  $qL\_Ln$ ,  $(F_{m\_Ln} - F_{t\_Ln}) / (F_{m\_Ln} - F_{o\_Ln})$ , coefficient of photochemical quenching during light adaptation;  $qL\_Lss$ ,  $(F_{m\_Lss} - F_{t\_Lss}) / (F_{m\_Lss} - F_{o\_Lss})$ , coefficient of photochemical quenching in steady-state;  $\Phi_{PSII\_Lss}$ ,  $(F_{m\_Lss} - F_{t\_Lss}) / F_{m\_Lss}$ , steady-state PSII quantum yield;  $\Phi_{PSII\_Ln}$ ,  $(F_{m\_Ln} - F_{t\_Ln}) / F_{m\_Ln}$ , PSII quantum yield in light.
