# Supplementary material for: Time-Series Chlorophyll Fluorescence Imaging Reveals Dynamic Photosynthetic Fingerprints of sos Mutants to Drought Stress
Source: Sensors (Basel). 2019 Jun 12;19(12):2649. doi: 10.3390/s19122649 (PMC6631407; doi:10.3390/s19122649)
Supplement: Supplementary file 1 [file sensors-19-02649-s001.zip]

Archive with 5 entries (5 files):
- Additional file 5..xlsx
- Additional file 1.pdf
- Additional file 2.pdf
- Additional file 3.xlsx
- Additional file 4R.pdf
