# Supplementary material for: Time-Series Chlorophyll Fluorescence Imaging Reveals Dynamic Photosynthetic Fingerprints of sos Mutants to Drought Stress
Source: Sensors (Basel). 2019 Jun 12;19(12):2649. doi: 10.3390/s19122649 (PMC6631407; doi:10.3390/s19122649)
Supplement: Supplementary file 1 [file sensors-19-02649-s001.zip › Additional file 3.xlsx]

## Sheet: col
	1	2	3	4	5	6	7	8	9	10	11	12	13	14	15	16	17	18	19	20	21	22	23	24	25	26	27	28	29	30	31	32	33	34	35	36	37	38	39	40	41	42	43	44	45	46	47	48	49
	Fo	Fm	Fp	Fm_L1	Fm_L2	Fm_L3	Fm_L4	Fm_Lss	Fm_D1	Fm_D2	Fm_D3	Ft_L1	Ft_L2	Ft_L3	Ft_L4	Ft_Lss	Ft_D1	Ft_D2	Ft_D3	Fo_L1	Fo_L2	Fo_L3	Fo_L4	Fo_Lss	Fo_D1	Fo_D2	Fo_D3	QY_max	Fv_Fm_L1	Fv_Fm_L2	Fv_Fm_L3	Fv_Fm_L4	Fv_Fm_Lss	Fv_Fm_D1	Fv_Fm_D2	Fv_Fm_D3	QY_L1	QY_L2	QY_L3	QY_L4	QY_Lss	QY_D1	QY_D2	QY_D3	NPQ_L1	NPQ_L2	NPQ_L3	NPQ_L4	NPQ_Lss
Day0	94.32	556.3	525.65	522.79	408.27	304.21	243.46	232.17	450.03	481.9	496.01	460.53	352.87	260.77	182.42	154.46	110.11	117.04	114.41	93.306	88.8575	82.7006	77.4469	76.2672	90.6891	91.914	92.4154	0.830451	0.821523	0.782356	0.728146	0.68189	0.671503	0.798482	0.809267	0.813682	0.119092	0.135695	0.142796	0.250719	0.334712	0.755327	0.757128	0.769339	0.0640984	0.362579	0.828671	1.28497	1.39609
	70.71	420.85	394.02	395.83	320.5	239.39	192.45	198.37	351.49	370.56	377.56	327.8	247.04	184.48	122.64	107.91	84.37	87.7	86.08	69.9669	67.1761	62.7218	58.9543	59.4983	68.4408	69.1336	69.3736	0.831983	0.82324	0.790402	0.737993	0.693664	0.700064	0.805284	0.813435	0.816258	0.171867	0.229204	0.229375	0.362744	0.456017	0.759965	0.763331	0.77201	0.063209	0.313105	0.75801	1.1868	1.12154
	93.68	567.87	540.86	532.95	429.87	321.09	253.23	241.52	464.19	493.98	508.12	470.18	368.74	274.25	188.62	160.66	111.89	117.18	115.23	92.6782	88.9683	83.1389	77.7445	76.6042	90.3509	91.424	91.8973	0.835033	0.826103	0.793034	0.741073	0.692989	0.682825	0.805358	0.814924	0.819142	0.117778	0.142206	0.145878	0.255144	0.334796	0.758956	0.762784	0.773223	0.0655221	0.321027	0.76857	1.24251	1.35123
	70.97	417.08	391.74	391.45	319.34	233.17	186.62	184.13	344.38	364.89	372.94	329.92	253.62	188.37	125.63	109.31	84.63	88.39	86.78	70.188	67.4568	62.5721	58.6465	58.3983	68.5091	69.2838	69.5689	0.829841	0.820697	0.788762	0.731646	0.685744	0.682842	0.801065	0.810124	0.813458	0.157185	0.205799	0.192134	0.326814	0.406343	0.754254	0.757763	0.767308	0.0654745	0.306069	0.788738	1.23492	1.26514
	88.23	540.34	503.71	505.31	407.67	304.4	243.95	239.39	438.26	465.85	478.36	437.01	338.63	251.32	174.45	150.72	105.69	110.84	108.4	87.2424	83.7781	78.3179	73.624	73.2032	84.9973	85.985	86.402	0.836714	0.827349	0.794495	0.742714	0.6982	0.69421	0.806057	0.815423	0.819379	0.135165	0.169353	0.174376	0.284894	0.3704	0.758842	0.762069	0.773392	0.0693238	0.325435	0.775099	1.21496	1.25715
	76.96	463.22	433.63	436.84	360.9	271.37	219.15	218.47	383.84	403.47	413.13	370.81	289.88	218.77	147.62	128.05	92.62	97.13	94.49	76.1955	73.498	68.8707	64.9433	64.8835	74.4036	75.112	75.4403	0.833859	0.825576	0.796348	0.746211	0.703658	0.70301	0.80616	0.813835	0.817393	0.151154	0.196786	0.193831	0.326397	0.413878	0.758702	0.759263	0.771283	0.0603882	0.283513	0.706968	1.11371	1.12029
	85.99	524.98	495.47	492.68	399.37	304.79	244.98	237.33	438.7	459.99	470.28	433.85	336.67	255.36	179.16	153.51	104.9	109.48	107.32	85.0764	81.7771	76.8913	72.4302	71.7465	83.3064	84.045	84.3824	0.836203	0.827319	0.795235	0.747724	0.704342	0.697693	0.810106	0.817289	0.82057	0.119408	0.156997	0.162177	0.268675	0.353179	0.760884	0.761995	0.771796	0.0655598	0.31452	0.722432	1.14295	1.21203
	64.58	386.55	355.75	363.08	293.78	220.09	174.71	178.72	326.06	340.05	347.33	299.16	227.46	170.61	112.37	99.83	76.99	81.87	79.21	63.89	61.3437	57.3352	53.7015	54.0744	62.6386	63.1376	63.3843	0.832932	0.824033	0.791192	0.739492	0.692625	0.697435	0.807892	0.814329	0.81751	0.176049	0.225747	0.224817	0.35682	0.441417	0.763878	0.759241	0.771946	0.0646414	0.315781	0.756327	1.21252	1.16288
	80.46	462.45	434.77	433.6	323.69	236.12	196.87	204.36	374.75	404.55	419.7	371.28	270.3	190.65	136.78	122.82	93.29	98.35	96.49	79.5392	74.8754	68.9595	65.1651	65.9654	77.3121	78.5051	79.0589	0.826014	0.816561	0.768682	0.707947	0.668994	0.67721	0.793697	0.805945	0.81163	0.143727	0.164942	0.192572	0.305227	0.399002	0.751061	0.75689	0.770098	0.066536	0.428682	0.958538	1.34901	1.26292
	78.05	451.05	426.5	421.51	339.7	255.48	205.88	213.02	377.88	397.1	406.46	356.79	279.11	203.55	138.63	124.01	91.47	94.5	93.61	77.1148	73.8606	68.9206	64.7147	65.4037	75.5196	76.2572	76.596	0.826959	0.817051	0.782571	0.730231	0.685668	0.692969	0.800149	0.807965	0.811553	0.153543	0.178363	0.203264	0.326647	0.417848	0.757939	0.762025	0.769694	0.0700814	0.327789	0.7655	1.19084	1.11741
	83.91	497.43	467.7	465.98	365.8	270.84	220.94	226.24	407.67	434.31	448.19	396.11	308.7	219.58	154.53	138.9	98.7	102.54	100.62	82.9654	79.1081	73.5326	69.2842	69.7969	80.9051	81.9021	82.3832	0.831313	0.821955	0.783739	0.728502	0.686412	0.691492	0.801543	0.81142	0.816187	0.149942	0.156096	0.189263	0.300579	0.38605	0.757892	0.763901	0.775497	0.0674922	0.359841	0.836619	1.25143	1.19868
	66.44	387.4	361.9	362.83	290.39	216.68	178.24	192.03	324.41	340.42	347.93	293.24	228.55	163.05	110.96	103.89	79.66	80.82	79.43	65.6772	62.8397	58.531	55.3089	56.5695	64.2988	64.9038	65.172	0.828498	0.818986	0.783602	0.729874	0.689694	0.705413	0.801798	0.809342	0.812686	0.191798	0.212955	0.247508	0.377469	0.458991	0.754447	0.762587	0.771707	0.0677177	0.334068	0.78789	1.17347	1.01739
Day1	88.82	538.69	507.06	506	435.22	338.49	274.16	261.48	453.01	476.11	483.3	449.88	359.75	285.08	202.62	171.39	104.37	111.79	108.04	87.8839	85.4697	80.928	76.6291	75.6043	86.1339	86.9359	87.1727	0.835119	0.826317	0.803617	0.760915	0.720495	0.71086	0.809863	0.817404	0.81963	0.110909	0.173407	0.157789	0.260943	0.344539	0.769608	0.765201	0.776454	0.0646047	0.237742	0.59145	0.964875	1.06016
	61.38	378.35	353.46	357.91	316.38	246.79	201.66	205.39	324.14	338.68	341.4	296.16	221.98	182.96	121.86	107.82	72.65	77.87	75.77	60.8165	59.4896	56.4942	53.7411	54.0024	59.7586	60.2354	60.3209	0.837769	0.830079	0.811968	0.771084	0.733506	0.737074	0.815639	0.822147	0.823313	0.172529	0.298375	0.258641	0.395716	0.475047	0.775868	0.770078	0.778061	0.0571093	0.195872	0.533085	0.876178	0.842105
	108.51	675.43	649.96	637.38	549.33	422.96	340.29	314.21	561.91	597.36	609.68	580.35	478.92	372.38	263.58	221.31	129.04	137.05	133.37	107.479	104.651	99.0149	93.6867	91.5937	105.099	106.279	106.662	0.839347	0.831373	0.809494	0.7659	0.724686	0.708495	0.812961	0.822086	0.825052	0.0894757	0.128174	0.119586	0.225425	0.295662	0.770355	0.770574	0.781246	0.0596975	0.229552	0.596912	0.984866	1.14961
	82.45	506.96	484.96	479.51	421.73	328.97	264.88	252.03	432.35	452.54	459.19	417.16	329.85	266.91	182.78	154.39	97.77	104.49	101.24	81.6895	79.8263	75.7816	71.7807	70.8025	80.1991	80.8684	81.0782	0.837364	0.82964	0.810717	0.76964	0.729007	0.719071	0.814504	0.821301	0.823432	0.130029	0.217865	0.188649	0.309952	0.387414	0.773864	0.769103	0.779525	0.0572459	0.202096	0.541052	0.913923	1.01151
	100.86	629.59	602.04	593.52	513.11	401.78	326.3	310.03	530.3	556.79	565.47	533.56	429.86	338.47	240.39	205.62	119.26	126.29	123.6	99.8875	97.3208	92.4614	87.7881	86.5659	97.9228	98.7907	99.0605	0.839801	0.831703	0.810332	0.769871	0.730959	0.720782	0.815344	0.822571	0.824817	0.101024	0.162246	0.157574	0.263285	0.336774	0.775108	0.773182	0.781421	0.060773	0.227008	0.567002	0.929482	1.03074
	69.37	420.81	397.56	398.57	342.42	269.4	224.97	227.04	364.72	375.48	379.61	336.93	253.88	204.42	143.08	126.8	81.5	86.93	84.23	68.7377	66.8473	63.4879	60.6644	60.814	67.6548	68.0164	68.1507	0.835151	0.827539	0.80478	0.764336	0.730344	0.732144	0.814502	0.818855	0.820472	0.154653	0.258571	0.241203	0.364004	0.441508	0.776541	0.768483	0.778114	0.0557995	0.228929	0.562027	0.870516	0.853462
	90.25	552.76	527.37	523.8	458.01	356.05	285.1	263.87	466.53	490.31	498.11	469.94	383.48	305.77	216.5	180.73	105.42	111.84	109.34	89.4426	87.3013	82.7827	78.2548	76.564	87.6062	88.4114	88.6618	0.836728	0.829243	0.80939	0.767497	0.725518	0.709842	0.812217	0.819683	0.822004	0.102826	0.162726	0.141216	0.240617	0.315079	0.774034	0.771899	0.78049	0.0552883	0.206873	0.552479	0.938828	1.09482
	73.69	442.81	422.4	418.25	365.74	284.8	227.08	218.06	377.1	394.46	400.74	362.66	289.59	231.51	158.9	133.65	85.12	91.6	90.21	72.9769	71.1934	67.4614	63.6303	62.9012	71.6134	72.2169	72.4247	0.833586	0.825519	0.805344	0.763127	0.719789	0.711542	0.810094	0.816922	0.819273	0.132911	0.208208	0.187114	0.300247	0.387095	0.774277	0.767784	0.774891	0.0587209	0.210723	0.55481	0.950018	1.03068
	85.77	513.53	482.56	485.47	423.7	328	258.78	242.55	423.39	454.64	464.66	429.09	353.72	278.7	190.42	157.68	98.81	107.26	104.6	84.9499	82.8367	78.3664	73.659	72.2823	82.8249	83.9537	84.2894	0.83298	0.825015	0.804492	0.761078	0.71536	0.70199	0.804377	0.81534	0.8186	0.116135	0.165164	0.150305	0.264163	0.349907	0.766622	0.764077	0.774889	0.0577997	0.212013	0.56564	0.984427	1.11721
	76.64	464.93	442.54	439.05	388.26	302.02	239.23	228.72	393.66	415.22	422.01	380.59	303.75	246.81	166.74	139.3	89.24	95.95	93.95	75.9025	74.2239	70.3819	66.3252	65.4908	74.4191	75.1568	75.3763	0.835158	0.827121	0.808829	0.766963	0.722756	0.713664	0.810956	0.818995	0.821387	0.133151	0.217663	0.182802	0.303014	0.390958	0.773307	0.768918	0.777375	0.0589455	0.197471	0.539401	0.943444	1.03275
	96.57	601.01	572.01	567.67	495.17	386.63	303.69	279.46	497.62	530.35	541.42	509.32	418.84	332.86	228.84	189.61	112.54	120.93	117.65	95.6672	93.3635	88.67	83.4436	81.5019	93.4502	94.546	94.8919	0.83932	0.831474	0.811452	0.770659	0.725234	0.708359	0.812206	0.821729	0.824735	0.102789	0.154149	0.139074	0.246468	0.321513	0.773843	0.771981	0.782701	0.0587313	0.213745	0.554484	0.979025	1.15061
	80.52	495.75	472.75	468.5	416.28	327.18	257.51	240.98	414.91	441.09	448.45	409.33	333.21	267.43	178.88	147.4	92.62	100.91	97.75	79.7664	78.0984	74.3022	70.0012	68.7198	78.0501	78.9313	79.1638	0.837579	0.829741	0.81239	0.772901	0.728161	0.714832	0.811887	0.821054	0.823472	0.126297	0.199553	0.182621	0.305347	0.388331	0.776771	0.771226	0.782027	0.0581644	0.190905	0.515221	0.925168	1.05722
Day2	92.91	558.13	525.8	517.86	378.23	301.69	267.46	277.57	476.96	498.92	505.29	435.32	309.64	236.67	182.74	166.19	109.03	118.95	116.18	91.7227	86.0933	81.393	78.6765	79.5285	90.3504	91.1101	91.3203	0.833533	0.822881	0.772378	0.73021	0.705838	0.713483	0.81057	0.817385	0.819272	0.159387	0.181345	0.215519	0.316758	0.401268	0.771406	0.761585	0.770073	0.0777623	0.475637	0.850012	1.08678	1.01077
	84.1	502.42	476.78	468.88	359.39	279.33	252.05	277.18	434.92	449.85	455.81	381.44	267.1	203.57	153.9	144.26	97.63	105.36	102.96	83.1049	78.8474	74.1827	72.11	74.0302	81.9705	82.4865	82.6847	0.83261	0.822759	0.780608	0.734426	0.713906	0.732917	0.811527	0.816636	0.818598	0.186487	0.256796	0.27122	0.389407	0.479544	0.775522	0.765789	0.774116	0.0715322	0.39798	0.798661	0.993335	0.812613
	96.62	589.23	560.09	544.68	405.78	315.35	276.33	286.74	495	521.37	531.14	467.33	334.88	251.06	192.79	175.81	113.04	123.25	120.5	95.3413	89.9516	84.5754	81.4893	82.3711	93.6953	94.601	94.9178	0.836023	0.824959	0.778324	0.731805	0.705102	0.712732	0.810717	0.818553	0.821294	0.14201	0.174725	0.203869	0.30232	0.386866	0.771636	0.763604	0.773129	0.0817911	0.452092	0.868495	1.13234	1.05493
	78.13	464.95	441.63	430.58	317.61	246.65	227.09	249.22	405.03	417.73	424.27	350.37	241.58	182.61	142.05	134.17	91.63	99.54	97.19	77.0959	72.4799	68.0145	66.4366	68.2085	76.2348	76.6736	76.8911	0.83196	0.820949	0.771796	0.724247	0.707444	0.726312	0.81178	0.816452	0.818768	0.186284	0.239382	0.259639	0.374477	0.46164	0.77377	0.761712	0.770924	0.0798226	0.463902	0.88506	1.04743	0.865621
	85.38	516.89	484.52	480.02	358.18	275.87	255.17	276.64	445.46	461.53	466.92	395.62	275.16	205.87	162.49	153.17	100.07	107.39	105.27	84.3103	79.5571	74.6124	73.0105	74.6686	83.1769	83.7212	83.8969	0.83482	0.824361	0.777885	0.729538	0.713875	0.730087	0.813279	0.818601	0.820318	0.175826	0.231783	0.253743	0.363209	0.44632	0.775356	0.767317	0.774544	0.0768093	0.443101	0.873672	1.02567	0.868457
	80.36	478.66	452.75	443.97	329.23	254.73	232.81	257.06	418.13	431.4	433.78	364.43	247	186.62	147.07	137.56	94.56	100.63	98.84	79.3195	74.6702	70.0253	68.2585	70.2002	78.4533	78.9087	78.988	0.832115	0.82134	0.773198	0.7251	0.706806	0.726911	0.812371	0.817087	0.817908	0.179156	0.249765	0.267381	0.368283	0.464872	0.77385	0.766736	0.772143	0.0781359	0.453877	0.879088	1.05601	0.862056
	101.37	610.86	585.77	569.22	422.53	327.16	293.75	303.49	526.53	549.97	555.38	495.09	348.48	263.14	206.89	188.75	120.41	129.91	127.39	100.154	94.3885	88.6177	85.9692	86.7843	98.7455	99.5412	99.717	0.834054	0.82405	0.776611	0.72913	0.707339	0.714045	0.81246	0.819006	0.820453	0.130231	0.175254	0.195684	0.295694	0.378068	0.771314	0.763787	0.770626	0.0731527	0.44572	0.86716	1.07952	1.01278
	76.63	457.18	432.61	424.25	308.81	240.04	220.78	244.7	401.56	412.82	416.18	345.29	233.51	175.22	137.53	129.99	91.19	98.75	96.45	75.6458	70.9188	66.5408	64.9697	66.894	74.8913	75.2742	75.3852	0.832385	0.821695	0.770348	0.722793	0.705727	0.726629	0.813499	0.817658	0.818864	0.186117	0.243839	0.270038	0.377072	0.468778	0.772911	0.760792	0.768249	0.0776193	0.480457	0.904599	1.07075	0.868329
	82.17	487.56	456.54	452.9	329.1	259.43	238.47	254.24	418.52	436.49	443.18	374.6	256.81	194.04	154.96	146.36	98.33	106.07	102.46	81.1237	76.0026	71.5642	69.8702	71.1635	79.9473	80.5811	80.8062	0.831467	0.820879	0.769059	0.724148	0.707007	0.720093	0.808976	0.815389	0.817667	0.172886	0.21966	0.252053	0.350191	0.424323	0.765053	0.756993	0.768807	0.076529	0.481495	0.879351	1.04453	0.917716
	87.23	512	487.12	473.33	351.65	273.62	251.41	270.54	444.16	459.44	465.23	392.62	269.57	203.73	161.83	152.65	103.43	112.45	108.81	86.0325	80.9418	75.956	74.1378	75.7167	85.0177	85.5623	85.7611	0.829629	0.81824	0.769823	0.722403	0.705112	0.720128	0.808588	0.813768	0.815659	0.170515	0.233414	0.255427	0.35631	0.435758	0.767133	0.755246	0.766116	0.0816978	0.455993	0.871208	1.03651	0.892511
	106.46	637.21	606.21	588.23	434.3	339.91	307.76	323.28	545.96	569.11	579.68	506.23	351.31	265.22	211.54	198.09	124.59	135.45	132.24	104.999	98.7516	92.8866	90.3086	91.599	103.568	104.373	104.724	0.832928	0.8215	0.772619	0.726732	0.706562	0.716657	0.810301	0.816602	0.819342	0.139401	0.191089	0.219735	0.312646	0.387249	0.771796	0.761997	0.771874	0.0832667	0.467212	0.874643	1.07048	0.971078
	80.22	482.05	455.03	446.98	338.54	261.32	240.34	268.07	420.56	432.69	438.16	363.72	249.53	186.57	146.42	139.45	94.16	101.99	99.9	79.1861	74.9338	70.3335	68.719	70.8134	78.3145	78.7255	78.9047	0.833586	0.822842	0.778656	0.730853	0.714076	0.73584	0.813785	0.818056	0.819918	0.186272	0.262923	0.286048	0.39078	0.4798	0.776108	0.764289	0.772001	0.0784599	0.423909	0.844673	1.0057	0.798224
Day3	102.86	645.94	606.03	598.11	443.08	341.89	280.99	268.9	559.45	577.84	580.61	515.51	366.53	275.07	204.75	179.12	119.35	127.5	124.78	101.567	95.8704	90.1003	85.2321	84.0854	100.389	100.965	101.049	0.840759	0.830187	0.783627	0.736464	0.696672	0.687299	0.820558	0.825271	0.82596	0.138102	0.172768	0.195443	0.271326	0.333879	0.786665	0.779351	0.785088	0.0799686	0.457841	0.889321	1.2988	1.40216
	84.94	530.76	498.86	493.62	377.95	296.14	254.44	270.27	463.48	477.6	480.96	399.64	280.51	210.21	155.91	142.95	97.7	103.09	101.25	83.9294	79.778	75.3823	72.3635	73.5893	83.0116	83.4535	83.5554	0.839965	0.829972	0.788919	0.74545	0.715597	0.727719	0.820895	0.825265	0.826274	0.190389	0.257812	0.290167	0.387243	0.471084	0.789203	0.78415	0.789484	0.0752401	0.404313	0.897529	1.08599	0.963814
	85.95	538.09	503.57	496.85	367.2	285.45	244.36	253.08	465	482.32	487.3	407.85	287.03	213.76	160.63	146.64	98.46	104.78	102.04	84.8254	80.0028	75.3041	72.1055	72.8461	83.8449	84.3913	84.5425	0.840268	0.829274	0.782127	0.736192	0.704921	0.712162	0.819688	0.82503	0.826508	0.179129	0.218328	0.251147	0.34265	0.420578	0.788258	0.782758	0.790601	0.0830029	0.465387	0.885059	1.20204	1.12617
	79.2	491.97	462.91	453.71	338.29	259.53	221.37	226.98	430.91	442.19	445.52	369.95	256.98	193.14	143.06	130.66	90.15	95.34	93.13	78.1392	73.8026	69.2198	66.1772	66.6698	77.4336	77.7902	77.8926	0.839015	0.827777	0.781836	0.733288	0.701056	0.706275	0.820302	0.82408	0.825165	0.184611	0.240356	0.255809	0.353752	0.424355	0.790792	0.784391	0.790963	0.084327	0.454285	0.895619	1.22239	1.16746
	91.45	577.28	539.24	534.01	392.82	304.18	261.75	271.8	504.71	515.27	520.04	444.43	309.74	229.25	174.84	158.86	104.48	110.1	107	90.291	85.1182	80.0628	76.7865	77.6286	89.4134	89.7392	89.8828	0.841585	0.830919	0.783315	0.736792	0.706642	0.714391	0.822842	0.82584	0.827162	0.16775	0.211496	0.246334	0.332034	0.415526	0.79299	0.786326	0.794247	0.0810284	0.469579	0.897824	1.20546	1.12391
	86.04	536.19	506.89	496.41	361.06	279.46	238.58	246.33	472.88	481.47	486.7	412.72	282.93	208.6	158.59	142.85	97.54	103.7	100.73	84.9477	79.8268	74.986	71.6899	72.3742	84.2304	84.499	84.6586	0.839534	0.828876	0.77891	0.731675	0.699514	0.70619	0.821878	0.824498	0.826056	0.16859	0.216391	0.25356	0.335275	0.420087	0.793732	0.784618	0.793035	0.0801354	0.485044	0.918665	1.24742	1.17671
	94.47	598.02	566.29	554.99	414.3	316.98	264.62	262.65	524.76	537.25	542.29	475.55	337.31	251.01	189.57	167.86	109.45	115.07	112.68	93.3269	88.2854	82.8641	78.7886	78.613	92.4315	92.8116	92.9608	0.842029	0.83184	0.786905	0.738583	0.702258	0.700693	0.823859	0.827247	0.828577	0.143138	0.185832	0.20812	0.283614	0.360899	0.791428	0.785817	0.792214	0.0775329	0.443447	0.886617	1.25992	1.27687
	77.7	481.31	450.27	443.57	326.5	250.93	214.47	227.39	420.13	431.02	435.91	362.91	251.28	184.73	139.46	128.11	89.47	94.68	92.69	76.6472	72.1754	67.6703	64.704	65.8324	75.9154	76.2635	76.4152	0.838566	0.827204	0.778942	0.730322	0.698308	0.710487	0.819305	0.823063	0.8247	0.181843	0.230383	0.263819	0.349746	0.436607	0.787042	0.780335	0.787364	0.0850824	0.47415	0.918105	1.24418	1.11667
	95.49	591.92	552.78	546.44	399.82	315.18	266.08	269.87	517.82	529.84	533.38	467.64	331.86	246.78	186.86	167.75	108.79	116.58	113.04	94.2249	88.621	83.6423	79.7375	80.0745	93.3353	93.7186	93.8287	0.838678	0.827566	0.778348	0.734621	0.700325	0.703285	0.819753	0.823119	0.824087	0.144206	0.169976	0.217019	0.29773	0.378404	0.789908	0.779971	0.788069	0.0832296	0.480466	0.878038	1.22459	1.19335
	88.51	551.31	519.59	508.37	372.85	290.13	249.75	260.96	484.08	493.78	497.02	424.59	293.76	219.69	166.16	151.35	101.67	108.69	104.5	87.3258	82.194	77.3334	74.1383	75.0959	86.5796	86.8848	86.9846	0.839455	0.828224	0.779552	0.733453	0.70315	0.712232	0.821146	0.824041	0.824988	0.164801	0.212123	0.242788	0.334695	0.420026	0.789973	0.779882	0.789747	0.084466	0.478638	0.900217	1.20745	1.11262
	76.1	473.96	441.18	438.29	316.44	248.69	222	246.55	417.74	423.68	429.29	347.72	238.77	174.22	132.58	125.76	86.22	90.79	88.91	75.1184	70.4678	66.4373	64.3698	66.2836	74.4904	74.6771	74.8495	0.839438	0.82861	0.777311	0.732851	0.710046	0.731156	0.821682	0.823742	0.825644	0.206644	0.245449	0.299449	0.402793	0.489921	0.793604	0.785711	0.792891	0.0813845	0.497788	0.905827	1.13495	0.922369
Day4	84.75	532.01	504.98	490.17	330.12	259.26	220.66	225.64	470.85	481.1	484.8	405.27	263.13	195.38	149.45	135.29	96.73	104.77	102.47	83.6131	77.2264	72.5854	69.1965	69.6787	83.0319	83.345	83.4554	0.840698	0.82942	0.766066	0.720029	0.686411	0.691195	0.823655	0.826762	0.827856	0.173205	0.202926	0.246394	0.322714	0.400417	0.794563	0.782228	0.788634	0.0853581	0.611565	1.05203	1.41099	1.35778
	91.04	566.16	542.87	519.62	362.63	286.75	243.54	258.99	491.2	506.14	513.82	430.83	293.38	213.84	161.97	148.44	102.8	109.74	107.9	89.7474	83.5036	78.7076	75.0525	76.4581	88.8594	89.3365	89.5728	0.839197	0.827283	0.769728	0.725518	0.691827	0.704783	0.819097	0.823495	0.825673	0.170875	0.190966	0.254263	0.334935	0.42685	0.790717	0.783183	0.790004	0.0895655	0.561261	0.974403	1.32471	1.18603
	80.45	510.68	481.87	467.05	311.55	245.09	214.68	230.35	443.53	460.14	465.21	377.1	248.98	180.1	139.42	129.51	91.41	98.18	96.17	79.2832	73.0905	68.7189	66.0938	67.5077	78.5759	79.0816	79.23	0.842465	0.830247	0.765397	0.719618	0.692129	0.706934	0.82284	0.828136	0.82969	0.192592	0.200835	0.265168	0.350568	0.437769	0.793903	0.78663	0.793276	0.0934161	0.639159	1.08364	1.3788	1.21697
	77.7	486.04	464.25	440.76	297.83	231.49	197.83	206.78	420.38	433.92	440.32	364.16	238.4	174.24	134.63	124.18	88.77	94.36	92.12	76.4445	70.5707	66.0833	63.0222	63.9034	75.8071	76.2361	76.4313	0.840137	0.826562	0.76305	0.714531	0.681432	0.69096	0.81967	0.824308	0.826419	0.173791	0.199543	0.247311	0.319466	0.399458	0.788834	0.782541	0.790789	0.102732	0.631938	1.09962	1.45686	1.35052
	84.47	531.55	502.64	488.21	327.95	258.64	227.25	243.22	465.51	479.25	481.47	396.25	260.66	192.68	148.87	137.54	95.82	101.43	99.45	83.2949	76.8848	72.34	69.6492	71.0796	82.6077	83.0301	83.0965	0.841087	0.829387	0.765559	0.720306	0.693513	0.707756	0.822544	0.82675	0.827411	0.188362	0.205184	0.255026	0.344906	0.434504	0.794161	0.788357	0.793445	0.0887733	0.620826	1.05517	1.33905	1.18547
	77.89	484.1	459.12	443.79	295.66	231.68	204.33	219.33	426.88	437.64	439.86	359.59	231.72	170.77	132.02	122.13	88.02	93.75	91.96	76.7681	70.6455	66.2724	63.8285	65.2219	76.2456	76.5819	76.6496	0.839103	0.827017	0.761058	0.713948	0.68762	0.702631	0.821389	0.825012	0.825741	0.189729	0.216262	0.262906	0.353888	0.443168	0.793806	0.785783	0.790933	0.0908312	0.637354	1.08952	1.36921	1.20718
	85.17	541.4	515.68	497.56	333.4	261.93	225.76	235.65	476.03	486.97	491.05	412.2	268.54	199.68	154.55	140.81	98.34	104.11	102.28	84.0056	77.5581	72.929	69.8146	70.7327	83.369	83.6983	83.818	0.842686	0.831165	0.767372	0.721571	0.690757	0.69984	0.824866	0.828124	0.829309	0.171557	0.194541	0.237659	0.315423	0.402461	0.793416	0.786209	0.791712	0.08811	0.623875	1.06696	1.39812	1.29748
	65.67	405.92	381.08	369.64	242.75	191.75	172.54	194.55	356.86	364.88	368.08	286.61	184.43	134.8	105.54	101.48	75.2	80.24	78.6	64.6435	59.2292	55.6197	53.8797	55.8529	64.2412	64.4964	64.5957	0.838219	0.825118	0.756008	0.709936	0.687726	0.712912	0.819982	0.823239	0.824506	0.224624	0.240247	0.297001	0.388316	0.478386	0.789273	0.780092	0.786459	0.0981496	0.672173	1.11692	1.35261	1.08646
	84.64	533.01	507.38	486.69	324.62	261.03	225.89	233.18	466.06	477.98	483.95	407.56	270.98	201.55	156.69	141.89	97.63	104.19	101.93	83.3799	76.81	72.6238	69.611	70.2882	82.7523	83.1204	83.2991	0.841204	0.82868	0.763385	0.72178	0.691837	0.698567	0.822443	0.826101	0.827877	0.162588	0.165239	0.227867	0.306344	0.3915	0.790521	0.78202	0.789379	0.0951735	0.641951	1.04195	1.3596	1.28583
	72.43	450.89	425.15	412.56	276.47	222.5	201.92	233.01	395.25	404.16	411.05	321.45	215.13	155.3	119.59	117.37	82.29	86.51	85.37	71.3649	65.7651	62.1775	60.4556	62.9713	70.8283	71.1093	71.3196	0.839362	0.827019	0.762126	0.72055	0.700596	0.729749	0.820801	0.824057	0.826494	0.220841	0.221869	0.302022	0.407736	0.496288	0.791803	0.785951	0.792312	0.0929077	0.630882	1.02647	1.23301	0.935067
Day5	86.25	557.11	521.29	516.39	383.95	291.75	234.9	224.81	478.29	500.13	504.72	431.7	315.85	228.18	165.2	145.83	99.09	105.91	103.36	85.2098	80.6209	75.604	71.1422	70.1881	84.1042	84.7551	84.8859	0.845183	0.83499	0.790022	0.74086	0.697138	0.687789	0.824156	0.830534	0.831816	0.164004	0.177367	0.217892	0.296722	0.351319	0.792824	0.788235	0.795213	0.0788551	0.450996	0.909546	1.37169	1.47814
	79.58	503.8	470.12	466.64	365.43	282.61	233.57	238.18	422.83	449.15	455.57	366.7	276.12	200.27	145.67	132.6	88.44	94.2	92.55	78.5914	75.0888	70.824	67.2838	67.661	77.2435	78.0793	78.2711	0.84204	0.83158	0.794519	0.749393	0.711933	0.715925	0.817318	0.826162	0.828191	0.214169	0.244397	0.291356	0.376333	0.443278	0.790838	0.790271	0.796848	0.0796331	0.37865	0.782669	1.15696	1.11521
	96.03	610.31	576.38	561.78	416.68	317	255.21	244.61	491.62	543.94	556.31	464.41	340.22	244.92	184.93	166.41	106.27	114.48	114.27	94.7422	89.4869	83.826	78.7821	77.7421	92.5156	94.2211	94.5854	0.842654	0.831354	0.785238	0.735565	0.691305	0.682179	0.811815	0.82678	0.829977	0.173324	0.183498	0.227382	0.275381	0.319693	0.783837	0.789536	0.794593	0.0863861	0.464697	0.925268	1.3914	1.49503
	86.83	553.31	524.45	513.4	388.21	291.52	235.06	226.23	462.63	494.12	501.3	421.35	310.78	221.81	162.16	144.92	97.49	104.28	103.3	85.7835	81.3976	76.105	71.6143	70.7728	84.2389	85.2279	85.4389	0.843072	0.832911	0.790326	0.738937	0.695336	0.687165	0.817913	0.827516	0.829565	0.179295	0.199454	0.239126	0.310134	0.359413	0.78927	0.788958	0.793936	0.0777367	0.425285	0.898017	1.35391	1.44579
	82.6	528.85	493.27	491.48	360.74	274.76	232.26	236.75	449.15	475.34	480.55	396.61	282.97	203.42	153.06	139.92	92.64	99.35	98.32	81.6306	76.9958	72.1752	68.865	69.2544	80.3725	81.1728	81.3234	0.843812	0.833909	0.786562	0.737316	0.7035	0.707479	0.821056	0.829232	0.83077	0.193029	0.215585	0.259645	0.340997	0.408997	0.793744	0.790992	0.795401	0.0760356	0.466014	0.924771	1.27697	1.23379
	85.43	542.54	512.69	503.37	369.55	279.92	230.83	226.7	463.45	485.94	489.89	417.62	297.77	212.67	157.97	140.74	95.97	103.16	101.91	84.3959	79.5652	74.4338	70.4498	70.0603	83.1944	83.8914	84.0083	0.842537	0.832338	0.784697	0.734089	0.694798	0.690956	0.820489	0.827363	0.828516	0.170352	0.194236	0.240247	0.315644	0.37918	0.792923	0.78771	0.791974	0.0778155	0.46811	0.938197	1.35039	1.39321
	98.94	632.6	602.37	589.58	437.76	328.76	266.11	258.23	540.25	570.76	575.16	504.96	364.2	260.67	192.65	170.69	112.04	120.25	118.54	97.8236	92.5008	86.4447	81.4054	80.6525	96.3637	97.2913	97.4184	0.843598	0.834079	0.788695	0.737058	0.694091	0.687672	0.821631	0.829541	0.830624	0.143526	0.168037	0.207112	0.276051	0.339	0.792615	0.789316	0.793901	0.0729672	0.445084	0.9242	1.37721	1.44975
	76.65	478.34	448.18	443.05	317.37	242.9	202.94	205.4	408.01	432.5	436.55	355.24	246.6	177.04	132.79	121.96	85.37	92.14	91.31	75.684	70.8886	66.3452	62.9591	63.1939	74.5897	75.3699	75.492	0.839758	0.829175	0.776637	0.726862	0.689765	0.692337	0.817187	0.825734	0.827071	0.198194	0.222989	0.27114	0.345669	0.406232	0.790765	0.78696	0.790837	0.0796524	0.5072	0.969288	1.35705	1.32882
Day6	83.76	537.19	508.03	496.49	361.31	285.99	242.22	246.63	466.02	481.61	486.94	416.05	302.49	223.81	168.55	150.22	97.25	104.64	103.14	82.7029	77.8511	73.6705	70.3937	70.7614	81.8119	82.2794	82.4336	0.844078	0.833425	0.784531	0.742402	0.709381	0.713087	0.824446	0.829158	0.830711	0.162017	0.162796	0.21742	0.304145	0.390909	0.791318	0.782729	0.788187	0.0819755	0.486784	0.878352	1.21778	1.17812
	77.5	485.1	456.25	447.95	340.61	264.46	224.73	235.05	408.71	432.43	438.47	356.65	272.92	193.34	143.97	131.71	87.13	92.68	92.72	76.4866	72.581	68.385	65.3955	66.2418	75.2529	76.0207	76.2053	0.840239	0.829252	0.786909	0.741416	0.709004	0.71818	0.815877	0.824201	0.826202	0.203817	0.198732	0.268925	0.359365	0.439651	0.786817	0.785676	0.788537	0.0829334	0.42421	0.834304	1.15859	1.06382
	94.78	592.58	563.45	546.66	400.7	311	255.15	243.05	482.21	528.97	539.74	460.8	344.52	245.85	191.25	168.65	105.65	113.78	112.7	93.5235	88.0371	82.7907	78.2321	77.0559	91.4328	92.9914	93.3188	0.840055	0.828918	0.780292	0.733792	0.693388	0.682963	0.810388	0.824203	0.827104	0.157063	0.140205	0.209486	0.250441	0.30611	0.780905	0.784903	0.791196	0.084001	0.478862	0.905402	1.32248	1.4381
	85.3	532	509.46	493.73	366.01	283.48	235.07	228	449.93	477.75	484.41	411.28	307.45	220.42	167.84	148.13	96.93	103.69	102.42	84.2529	79.5178	74.7875	70.9336	70.2761	82.8761	83.7747	83.9772	0.839662	0.829354	0.782744	0.736181	0.698245	0.691772	0.815802	0.824647	0.82664	0.166994	0.159996	0.22245	0.286	0.350307	0.784566	0.782962	0.788568	0.077512	0.453512	0.876676	1.26316	1.33333
	82.5	517.61	487.14	479.1	350.39	272.01	231.05	234.93	435.69	464.39	471.42	389.29	286.63	207.27	159.03	144.66	92.28	99.72	98.14	81.4564	76.6682	72.121	68.8832	69.2241	80.0995	81.0201	81.2314	0.840614	0.82998	0.781192	0.734859	0.701869	0.705342	0.816155	0.825534	0.827688	0.187456	0.181969	0.238006	0.311707	0.384242	0.788198	0.785267	0.79182	0.0803799	0.47724	0.902908	1.24025	1.20325
	75.83	473.28	446.15	439.25	321.19	250.78	215.16	224.31	410.66	426.35	429.87	351.43	256.03	185.81	140.6	127.95	86.72	92.63	90.58	74.9003	70.4826	66.3921	63.6044	64.3807	74.0215	74.5158	74.6226	0.839778	0.829481	0.780558	0.735258	0.704386	0.712983	0.81975	0.825224	0.826407	0.199932	0.202871	0.259072	0.346533	0.429584	0.788828	0.782737	0.789285	0.077473	0.47352	0.887232	1.19967	1.10994
	98.85	620.82	596.53	577.77	419.55	328.8	275.07	268.12	531.79	559.49	567.44	493.2	364.55	264.49	200.41	177.81	111.47	120.47	118.56	97.691	91.8352	86.6031	82.3655	81.7311	96.2834	97.1543	97.3912	0.840775	0.830917	0.78111	0.736609	0.700565	0.69517	0.818945	0.826352	0.828367	0.146373	0.131093	0.19559	0.271422	0.336827	0.790387	0.784679	0.791062	0.0745106	0.479728	0.888139	1.25695	1.31546
Day7	86.51	545.3	509.06	498.6	334.79	272.54	236.12	238	476.61	492.99	497.65	404.05	271.07	204.38	160.58	144.65	99.52	107.24	105.72	85.2434	78.663	74.6564	71.63	71.802	84.5762	85.0778	85.2155	0.841353	0.829035	0.765038	0.726072	0.696637	0.698311	0.822546	0.827425	0.828764	0.189631	0.190328	0.250092	0.319922	0.392227	0.791192	0.78247	0.787562	0.0936623	0.628782	1.00081	1.30942	1.29118
	86.07	533.08	499.92	488.96	354.05	281.46	236.65	231.18	448.1	478.53	485.08	384.7	281.35	206.91	163.1	145.6	96.73	102.89	102.19	84.8341	79.5734	75.2136	71.5911	71.0823	83.5129	84.5145	84.7165	0.838542	0.826501	0.775248	0.732773	0.697481	0.692524	0.813629	0.823387	0.825356	0.213228	0.205338	0.264869	0.310797	0.370188	0.784133	0.784987	0.789334	0.0902323	0.505663	0.893981	1.25261	1.30591
	90.07	552.59	512.47	495.53	346.25	280.18	237.71	224.65	458.69	499.12	509.56	392.32	273.41	207.41	169.48	153.63	100.26	109.89	109.56	88.4106	82.0957	77.7487	74.0761	72.758	87.1616	88.5242	88.8471	0.837004	0.821584	0.7629	0.722504	0.688376	0.676127	0.809977	0.822639	0.82564	0.208282	0.210368	0.259726	0.28703	0.316136	0.781421	0.779833	0.784991	0.115149	0.595928	0.972268	1.32464	1.45978
	83.43	515.91	486.93	467.2	327.03	261.31	218.87	206.3	432.05	466.1	473.25	374.21	263.36	196.49	157.26	140.93	93.65	101.76	101.13	82.0467	76.3033	72.0739	68.4149	67.1362	80.891	82.0127	82.2313	0.838286	0.824386	0.766678	0.724182	0.687418	0.67457	0.812774	0.824045	0.826241	0.199037	0.194692	0.248058	0.281491	0.316869	0.783243	0.781678	0.786307	0.104259	0.577562	0.974322	1.35715	1.50078
	99.09	608.54	571.12	550.97	371.77	302.62	259.24	249.55	510.88	550.42	558.06	448.34	305.99	230.09	187.49	169.59	110.78	119.08	118.5	97.4323	89.7796	85.0844	81.2613	80.2841	96.0987	97.4151	97.6517	0.837168	0.823162	0.758508	0.718841	0.68654	0.678285	0.811896	0.823017	0.825016	0.186271	0.176937	0.239674	0.276771	0.320417	0.783158	0.783656	0.787657	0.104488	0.636872	1.0109	1.3474	1.43855
	95.54	586.07	556.16	533.57	366.57	296.04	249.39	238.92	502.92	531.02	538.68	442.58	306.3	228.18	181.35	162.49	108.49	116.54	114.93	94.0317	87.0433	82.3828	78.3066	77.2437	93.0325	93.9522	94.1892	0.836982	0.823769	0.762547	0.721717	0.686008	0.676696	0.815015	0.823072	0.825148	0.170531	0.164416	0.229226	0.272826	0.319898	0.78428	0.780536	0.786645	0.0983938	0.598794	0.979699	1.35001	1.453
[truncated: 49 more columns]

## Sheet: sos1
	1	2	3	4	5	6	7	8	9	10	11	12	13	14	15	16	17	18	19	20	21	22	23	24	25	26	27	28	29	30	31	32	33	34	35	36	37	38	39	40	41	42	43	44	45	46	47	48	49
	Fo	Fm	Fp	Fm_L1	Fm_L2	Fm_L3	Fm_L4	Fm_Lss	Fm_D1	Fm_D2	Fm_D3	Ft_L1	Ft_L2	Ft_L3	Ft_L4	Ft_Lss	Ft_D1	Ft_D2	Ft_D3	Fo_L1	Fo_L2	Fo_L3	Fo_L4	Fo_Lss	Fo_D1	Fo_D2	Fo_D3	QY_max	Fv_Fm_L1	Fv_Fm_L2	Fv_Fm_L3	Fv_Fm_L4	Fv_Fm_Lss	Fv_Fm_D1	Fv_Fm_D2	Fv_Fm_D3	QY_L1	QY_L2	QY_L3	QY_L4	QY_Lss	QY_D1	QY_D2	QY_D3	NPQ_L1	NPQ_L2	NPQ_L3	NPQ_L4	NPQ_Lss
Day0	90.32	567.87	524.57	531.75	452.69	365.68	309.69	282.98	463.44	493.21	507.38	457.1	370.49	296.69	217.13	175.98	106.9	114.29	111.93	89.3546	86.8071	83.0192	79.746	77.8537	87.1949	88.1965	88.6392	0.84095	0.831961	0.808242	0.772973	0.742497	0.724879	0.811853	0.821179	0.8253	0.140386	0.181581	0.188662	0.29888	0.378119	0.769334	0.768273	0.779396	0.0679267	0.254435	0.552915	0.833672	1.00675
	74.34	464.33	426.25	435.13	372.44	297.62	246.76	235.08	386.91	410.37	418.51	358.06	281.52	227.6	156.21	130.52	88.81	95.42	92.48	73.5498	71.5151	68.2219	65.1441	64.3007	72.0324	72.8073	73.0594	0.839898	0.830971	0.807982	0.770775	0.736002	0.726473	0.813827	0.822581	0.82543	0.177119	0.24412	0.235266	0.366956	0.444785	0.770463	0.767478	0.779026	0.0671064	0.246724	0.560144	0.881707	0.9752
	76.3	467.73	429.07	436.13	376.71	302.98	256.11	238.34	385.61	408.26	415.76	369.73	296.85	240.06	172.91	140.59	89.13	94.8	93.03	75.4087	73.4067	70.0834	67.2371	65.9463	73.7383	74.529	74.7753	0.836872	0.827096	0.805137	0.768687	0.737468	0.72331	0.808775	0.817447	0.820148	0.152248	0.211993	0.20767	0.32486	0.410128	0.76886	0.767795	0.776241	0.0724555	0.241618	0.543765	0.826286	0.962449
	61.33	378.33	342.15	351.31	303.37	241.55	200.1	191.3	310.6	328.81	336.63	281.2	220.38	180.7	125.41	105.74	72.52	78.01	75.77	60.5748	58.968	56.1736	53.5919	52.9397	59.236	59.8684	60.1227	0.837893	0.827575	0.805623	0.767445	0.732174	0.723264	0.809285	0.817924	0.821398	0.199567	0.27356	0.251915	0.373263	0.447256	0.766516	0.762751	0.774916	0.0769121	0.247091	0.56626	0.890705	0.977679
	93.8	582.04	544.21	545.57	467.58	375.6	323.57	291.57	468.06	505.51	518.11	477.8	392.82	317.74	237.8	188.84	109.54	117.4	114.98	92.8003	90.24	86.1676	83.102	80.8238	90.2579	91.566	91.9711	0.838843	0.829902	0.807006	0.770587	0.743172	0.722798	0.807166	0.818864	0.822487	0.124219	0.159887	0.154047	0.265074	0.352334	0.76597	0.767759	0.778078	0.0668475	0.244792	0.549627	0.798807	0.996227
	77.08	480.82	448.87	451.81	383.26	299.54	240.85	222.05	370.2	415.41	430.24	382.89	303.89	242.81	167.79	136.34	89.88	98.45	96.92	76.2947	74.0579	70.2632	66.4641	64.9467	73.5565	75.1822	75.6542	0.839691	0.831135	0.806769	0.76543	0.724044	0.707513	0.801306	0.819017	0.824158	0.152542	0.207092	0.18939	0.303342	0.385994	0.757212	0.763005	0.77473	0.0642084	0.254553	0.605195	0.996346	1.16537
	68.4	418.14	382.18	394.02	346.76	282.36	242.31	230.39	354.45	368.04	373.12	325.96	260.08	218.4	156.77	130.64	80.37	85	82.67	67.7219	66.1718	63.4119	61.1423	60.3544	66.4469	66.9101	67.0761	0.836418	0.828126	0.809171	0.775422	0.747669	0.738034	0.812535	0.818199	0.820229	0.172732	0.249971	0.226519	0.353019	0.432962	0.773254	0.769047	0.778436	0.0612152	0.205848	0.480875	0.725641	0.814923
	65.36	393.69	363.16	367.71	322.96	253.47	211.2	200.66	325.16	345.94	353.84	301.68	241.4	196.97	137.64	114.43	76.69	82.56	80.14	64.6022	63.0669	59.8621	57.1603	56.3591	63.1504	63.8958	64.1604	0.833981	0.824312	0.804722	0.763829	0.729355	0.719131	0.805787	0.815298	0.818674	0.179571	0.252539	0.222906	0.348295	0.429732	0.764147	0.761346	0.773513	0.0706535	0.219005	0.553202	0.864063	0.961975
	80.15	494.43	458.74	464.73	404.83	332.99	288.55	274.51	421.5	436.14	440.38	400.61	326.35	273.97	205.78	172.21	98.3	101.45	98.61	79.3282	77.3739	74.3098	71.8407	70.9374	77.9633	78.4503	78.5864	0.837894	0.829303	0.808873	0.776841	0.751028	0.741585	0.815034	0.820126	0.821549	0.137973	0.193859	0.177243	0.286848	0.372664	0.766785	0.767391	0.77608	0.0639081	0.221327	0.484819	0.713499	0.801137
	78.03	478.74	450.04	449.06	387.75	313.06	262.52	245	389.47	417.75	427.95	387.15	306.62	254.9	184.37	152.57	94.13	99.94	96.77	77.1984	75.1555	71.8337	68.7947	67.5292	75.2199	76.2164	76.5492	0.83701	0.828089	0.806175	0.770543	0.737945	0.72437	0.806866	0.817555	0.821126	0.137866	0.209233	0.185779	0.297692	0.377265	0.758313	0.760766	0.773875	0.0660936	0.234662	0.529228	0.823632	0.954041
	61.81	374.7	342.5	351.77	308.44	250.94	217.39	211.84	317.57	331.31	334.32	292.96	232.8	197.5	143.14	121.28	73.27	76.68	74.87	61.1524	59.6946	57.1598	55.2186	54.8536	60.0286	60.5029	60.6025	0.835041	0.826158	0.806463	0.772217	0.745993	0.741061	0.810975	0.817383	0.818729	0.167183	0.245234	0.212959	0.341552	0.427492	0.769279	0.768555	0.776053	0.0651846	0.214823	0.493186	0.72363	0.768788
	62.13	368.76	347.39	346.56	298.41	243.08	204.3	195.16	304.28	324.18	333.1	295.74	233.41	197.87	145.71	121.77	73.8	78.27	76.36	61.4666	59.7565	57.1515	54.7098	54.0322	59.9882	60.7231	61.0292	0.831516	0.822638	0.79975	0.764886	0.732208	0.723139	0.802852	0.812687	0.816784	0.146641	0.217821	0.185988	0.286784	0.37605	0.75746	0.75856	0.77076	0.0640582	0.235749	0.517031	0.804993	0.889527
Day1	79.72	505.73	466.06	475.99	410.55	333.33	270.93	254.31	412.96	443.48	455.4	399.27	325.52	261.01	180.2	148.28	93.76	100.22	98.04	78.9425	76.9093	73.7105	70.1383	68.9714	76.9935	77.9943	78.3549	0.842366	0.834151	0.812668	0.778866	0.74112	0.72879	0.813557	0.824131	0.827943	0.16118	0.207112	0.216962	0.334884	0.416932	0.772956	0.774015	0.784717	0.0624803	0.231835	0.517205	0.866645	0.988636
	76.06	473.98	440.88	443.24	382.09	305.34	242.89	234.51	389.49	417.42	427.22	371.11	297.66	236.67	158.25	132.83	89.19	95.67	93.82	75.2228	73.2338	69.8677	65.9856	65.3512	73.5014	74.4414	74.7472	0.839529	0.830289	0.808334	0.771181	0.728331	0.721329	0.811288	0.821663	0.825038	0.162734	0.220969	0.224897	0.348471	0.433585	0.771008	0.770806	0.780394	0.0693529	0.240493	0.552302	0.951418	1.02115
	93.58	589.16	554.76	553.83	485.65	398.31	328.92	302.2	489.41	521.37	532.77	481.88	397.39	323.42	229.76	185.61	109.86	118.08	115.64	92.6413	90.5157	86.9617	83.1327	81.3155	90.6455	91.6865	92.0328	0.841164	0.832726	0.813619	0.781673	0.747256	0.730922	0.814786	0.824143	0.827256	0.129914	0.181736	0.188019	0.301471	0.385804	0.775526	0.77352	0.782946	0.0637921	0.213137	0.479149	0.791195	0.94957
	78.18	481.22	451.82	445.91	381.51	318.05	260.21	246.58	395.9	416.33	427.16	372.58	300.47	247.84	173.31	146.22	91.78	98.05	96.58	77.187	74.9956	72.1652	68.7002	67.712	75.5354	76.2492	76.605	0.837538	0.8269	0.803424	0.773101	0.735982	0.725395	0.809206	0.816854	0.820665	0.16445	0.212419	0.220751	0.333961	0.407008	0.768174	0.76449	0.773902	0.0791864	0.261356	0.513033	0.849352	0.951578
	89.65	559.5	521.63	524.11	443.73	374.31	321.04	297.33	469.39	488.61	498.68	445.35	358.41	292.93	211.94	173.55	105.84	112.79	109.47	88.6904	86.0526	83.065	80.115	78.5518	86.9746	87.6132	87.9316	0.839768	0.830779	0.80607	0.778085	0.750452	0.735809	0.814707	0.820689	0.823671	0.150274	0.192279	0.217413	0.339833	0.416305	0.774516	0.769161	0.78048	0.067524	0.260902	0.49475	0.742773	0.881748
	71.09	427.88	397.88	395.23	332.58	278.62	236.07	228.33	359.49	373.74	382.48	323.99	254.95	208.09	149.35	130.24	84.3	89.05	86.79	70.1275	67.8593	65.2797	62.6346	62.0763	68.9119	69.4192	69.7151	0.833855	0.822565	0.795961	0.765703	0.734678	0.728129	0.808307	0.814258	0.817729	0.180249	0.233418	0.25314	0.367349	0.429598	0.765501	0.761733	0.773086	0.0826101	0.286548	0.535712	0.812513	0.873954
	79.57	495.63	460.93	464.82	401.19	333.03	281.16	273.59	421.35	437.25	443.7	389.16	308.66	251.55	176.96	150.82	92.8	99.87	96.74	78.7322	76.6724	73.7863	70.8888	70.3976	77.38	77.9002	78.1025	0.839457	0.830618	0.808888	0.778439	0.74787	0.742689	0.816352	0.821841	0.823975	0.162773	0.230639	0.244663	0.370607	0.448737	0.779756	0.771595	0.78197	0.0662837	0.2354	0.488244	0.762804	0.811579
	85.33	512.98	486.28	478.17	404.72	339.22	285.31	267.65	430.79	449.11	460.43	405.65	323.21	266.15	190.51	159.36	99.37	107.04	104.23	84.3091	81.695	78.6302	75.3309	74.041	82.7053	83.3581	83.7402	0.833658	0.823684	0.798145	0.768203	0.735968	0.723366	0.808015	0.814393	0.818126	0.151662	0.201398	0.215406	0.33227	0.404596	0.769331	0.761662	0.773625	0.0727984	0.267494	0.512234	0.797974	0.916608
	89.02	548.71	514.04	512.28	435.61	372.1	327.6	301.84	468.86	481.9	489.49	442.8	354.58	297.42	226.04	184.72	105.78	113.09	110.26	88.0047	85.4219	82.6554	80.2344	78.5917	86.6265	87.0618	87.3064	0.837765	0.82821	0.803903	0.777868	0.755084	0.739625	0.81524	0.819336	0.821638	0.135629	0.186015	0.200699	0.310012	0.38802	0.774389	0.765325	0.774745	0.0711135	0.259636	0.47463	0.674939	0.817884
	67.87	415.16	384.49	388.07	330.2	279.77	248.07	242.98	359.68	366.36	372.23	316.72	243.53	203.31	149.4	127.69	80.43	85.98	83.99	67.1042	65.1304	62.8942	61.1379	60.8239	66.2007	66.4236	66.614	0.836521	0.827082	0.802755	0.775193	0.753546	0.749675	0.815946	0.818693	0.821041	0.183859	0.262477	0.273296	0.397751	0.474483	0.776385	0.765313	0.77436	0.069807	0.257299	0.483933	0.67356	0.708618
	86.12	529.1	495.13	493.11	422.48	360.78	316.86	294.38	446.53	464.84	473.44	423.33	337.86	286.54	214.58	178.42	102.03	109.32	105.35	85.1089	82.722	80.0418	77.6538	76.2272	83.6037	84.2248	84.503	0.837233	0.827404	0.804199	0.778142	0.754927	0.741058	0.81277	0.818809	0.821513	0.14151	0.200294	0.205776	0.322792	0.393913	0.771505	0.764822	0.77748	0.0729857	0.252367	0.466545	0.669823	0.797337
	78.37	467.55	440.9	436.16	372.38	315.41	278.93	262.75	400.25	413.53	419.01	369.11	294.9	245.77	181.97	153.02	92.75	98.29	95.56	77.4359	75.1506	72.5076	70.3913	69.3141	76.2218	76.6908	76.8772	0.832382	0.82246	0.798188	0.770116	0.747638	0.736197	0.809565	0.814546	0.816527	0.153728	0.208067	0.220792	0.347614	0.417621	0.76827	0.762315	0.771939	0.071969	0.255572	0.482356	0.676227	0.779448
Day2	87.01	534.41	496.49	500.13	423.94	343.01	299.74	303.61	459.59	479.46	488.33	413.8	328.07	256.2	191.17	172	102.51	110.32	108.82	86.0497	83.4687	79.7634	77.1728	77.4269	84.7633	85.4161	85.6934	0.837185	0.827945	0.803112	0.76746	0.742534	0.744979	0.815568	0.821849	0.824517	0.172615	0.22614	0.253083	0.362214	0.433484	0.776953	0.769908	0.777159	0.0685422	0.260579	0.558001	0.782912	0.760186
	85.68	518.36	484.35	484.41	400.89	315.91	273.97	279.21	445.65	464.83	472.68	394.85	303.82	230.57	169.91	155.19	100.44	108.86	106.9	84.6988	81.7219	77.4735	74.6703	75.0542	83.4301	84.0796	84.3329	0.834709	0.825151	0.796149	0.754761	0.727451	0.731191	0.81279	0.819118	0.821586	0.184885	0.242136	0.27014	0.379823	0.444182	0.774621	0.765807	0.773843	0.0700853	0.293023	0.640847	0.892032	0.856524
	96.46	594.58	560.48	557.26	476.09	385.65	332.68	326.81	506.26	534.41	543.67	473.74	382.97	302.25	225.23	197.47	115.18	123.8	120.86	95.4232	92.7164	88.667	85.5357	85.1425	93.8051	94.7297	95.0165	0.837768	0.828764	0.805254	0.770084	0.742889	0.739474	0.81471	0.82274	0.825231	0.149876	0.195593	0.216258	0.322983	0.395765	0.772488	0.768343	0.777696	0.0669705	0.248882	0.541761	0.787243	0.819345
	81.79	493.32	465.16	452.4	374.67	300.92	260.33	260.66	414.81	434.3	444.61	373.15	294.18	225.95	168.87	152.97	97.46	105.67	103.04	80.5816	77.7099	73.9509	71.2219	71.2466	79.3015	79.9878	80.3309	0.834205	0.82188	0.792591	0.754251	0.726417	0.726669	0.808824	0.815824	0.819323	0.175177	0.214829	0.249136	0.351323	0.413144	0.765049	0.756689	0.768246	0.0904509	0.316679	0.639373	0.894979	0.89258
	99.18	614.12	572.36	570.28	453.15	369.62	331.39	332	525.47	546.4	555.63	478.94	367.41	281.75	219.1	197.36	118.6	127.91	124.21	97.9638	93.7989	89.6072	87.1693	87.2115	96.5494	97.2338	97.5221	0.838501	0.828218	0.793007	0.757569	0.736958	0.737315	0.816261	0.822047	0.824484	0.160167	0.189209	0.237731	0.338845	0.405542	0.774297	0.765904	0.776452	0.0768745	0.355225	0.66149	0.853164	0.849759
	80.6	497.46	462.48	460.47	362.33	293.8	266.06	273.62	430.3	443.31	450.48	367.56	277.04	208.25	162.56	150.05	97.59	105.1	101.73	79.5644	76.0072	72.4616	70.645	71.1671	78.6121	79.0358	79.2607	0.837977	0.82721	0.790227	0.753364	0.734477	0.739905	0.817309	0.821714	0.824053	0.201772	0.235393	0.291184	0.38901	0.451612	0.773205	0.76292	0.774174	0.080331	0.372947	0.693193	0.869729	0.818069
	97.31	605.37	570.22	565.82	468.03	375.5	328.54	327.72	517.52	542.11	553.59	477.71	379.86	289.49	218.74	196.25	116.92	126.72	123.38	96.2288	92.9267	88.5922	85.7021	85.6462	94.7253	95.5183	95.8686	0.839255	0.82993	0.801451	0.764069	0.739143	0.73866	0.816963	0.823803	0.826824	0.155721	0.188385	0.229055	0.334206	0.401166	0.774076	0.766247	0.777127	0.0698986	0.293443	0.61217	0.842607	0.847217
	80.65	490.42	460.65	455.04	364.79	292.79	260.94	271.2	423.37	437.48	446.63	364.01	280.38	211.6	159.71	146.97	97.3	105.54	102.8	79.6318	76.3272	72.5921	70.4598	71.187	78.6028	79.0763	79.3703	0.835549	0.825	0.790764	0.752068	0.729977	0.737511	0.81434	0.819246	0.822291	0.200048	0.231393	0.277298	0.387944	0.458075	0.770177	0.758755	0.769832	0.0777514	0.34439	0.674989	0.879436	0.808333
	95.14	579.41	541.85	540.19	426.73	351.06	318.45	321.26	501.13	515.72	525.62	453.86	344.79	267.16	207.9	186.18	114.9	123.79	119.96	94.0191	89.8607	85.959	83.8564	84.05	92.7607	93.2491	93.5677	0.835798	0.825952	0.78942	0.755144	0.736673	0.738374	0.814897	0.819187	0.821986	0.159814	0.192018	0.23899	0.34715	0.420469	0.770718	0.759967	0.771774	0.0726041	0.357791	0.650459	0.819469	0.803555
	80.73	490.17	457.85	455.41	365.92	297.92	274.71	284.99	427.2	436.07	445.1	362.95	269.44	207.98	162.83	150.84	97.7	104.35	101.43	79.7278	76.4544	72.9742	71.4946	72.1722	78.8166	79.1135	79.4057	0.835302	0.824932	0.791063	0.755054	0.739745	0.746755	0.815504	0.818576	0.8216	0.203026	0.263664	0.301893	0.407266	0.470718	0.771301	0.760704	0.772119	0.0763268	0.339555	0.645307	0.784318	0.719955
	98.9	611.29	577.57	569.77	458.75	376.41	336.07	328.81	527.51	545.57	555.42	487.89	382.72	294.29	229.59	201.37	119.14	127.88	124.82	97.7476	93.8511	89.831	87.3293	86.8311	96.4224	97.0094	97.3162	0.838211	0.828444	0.79542	0.761348	0.740145	0.735923	0.817212	0.822187	0.824788	0.143707	0.165733	0.218166	0.316839	0.387579	0.774146	0.765603	0.775269	0.0728715	0.332512	0.624	0.818937	0.859098
	86.04	519.66	493.77	482.88	388.79	315.1	277.9	273.02	444.48	462.16	472.4	406.52	318.72	243.52	185.49	163.95	103.3	110.77	107.98	84.9685	81.4979	77.6894	75.2073	74.8452	83.6961	84.3034	84.6381	0.83443	0.824038	0.790381	0.753445	0.729373	0.725862	0.811699	0.817588	0.820834	0.158135	0.180226	0.227166	0.33253	0.399495	0.767594	0.760321	0.771423	0.076168	0.336608	0.649191	0.869953	0.903377
Day3	86.6	530.9	488.24	492.31	385.64	314.72	272.21	279.07	457.71	474.54	484.07	385.6	295.26	224.87	168.94	154.54	98.01	103.33	101.34	85.5067	81.5871	77.8745	74.9772	75.4883	84.3986	84.9542	85.2546	0.836881	0.826315	0.788437	0.752559	0.724561	0.7295	0.815607	0.820976	0.82388	0.216754	0.234364	0.285492	0.379376	0.446232	0.785869	0.782252	0.79065	0.0783856	0.376673	0.686896	0.950332	0.90239
	88.56	538.38	503.68	497.25	390.18	313.09	260.19	254.58	461.63	483.31	490.02	399.3	309.76	234.9	173.18	154.57	100.91	106.71	104.18	87.3712	83.3523	79.1871	75.3142	74.8369	86.2025	86.9307	87.1453	0.835507	0.824291	0.786375	0.747079	0.710541	0.706038	0.813265	0.820135	0.82216	0.196983	0.20611	0.249736	0.334409	0.392843	0.781405	0.77921	0.787396	0.0827149	0.379825	0.719569	1.06918	1.11478
	97	597.61	559.47	556.7	434.37	353.26	296.69	291.05	514.51	539.46	546.78	454.43	344.48	266.29	198.03	175.65	111.06	117.89	115.62	95.8566	91.4233	87.2089	83.2884	82.8378	94.522	95.332	95.5581	0.837687	0.827813	0.789527	0.753131	0.719275	0.715383	0.816287	0.823282	0.825235	0.183708	0.206943	0.246193	0.332536	0.396495	0.784144	0.781467	0.788544	0.0734866	0.375809	0.6917	1.01426	1.05329
	83.67	509.46	475.79	464.46	365.25	295.28	248.6	251.4	430.81	451.38	461.74	368.24	287.82	219.83	162.6	148.21	95.88	101.6	100.4	82.3595	78.5749	74.7637	71.3706	71.5995	81.2344	81.9385	82.2736	0.835767	0.822677	0.784874	0.746804	0.71291	0.715197	0.811438	0.818471	0.821818	0.207165	0.211992	0.25552	0.345937	0.410461	0.777442	0.774912	0.782562	0.0968867	0.394825	0.725345	1.04932	1.02649
	100.29	627.77	582.9	579.33	423.78	344.38	292.53	295.8	545.4	561.86	568.07	476.7	339.52	259.43	194.58	176.97	115.2	122.38	120.25	98.968	93.1284	88.6375	84.7702	85.0426	97.9273	98.4451	98.634	0.840244	0.829168	0.780243	0.742617	0.710217	0.7125	0.820449	0.824787	0.82637	0.177153	0.19883	0.246675	0.334837	0.401724	0.788779	0.782188	0.788318	0.0836138	0.481358	0.822899	1.146	1.12228
	86.69	539.55	501.42	495.83	364.83	292.95	249.36	252.78	472.14	484.07	490.59	394.87	282.07	213.43	161.75	146.81	99.35	105.34	104.08	85.479	80.4961	76.362	73.0341	73.3247	84.7459	85.1225	85.3219	0.839329	0.827604	0.77936	0.739334	0.707114	0.709927	0.820507	0.824153	0.826083	0.203618	0.226845	0.271446	0.351339	0.419218	0.789575	0.782387	0.787847	0.0881754	0.478908	0.841782	1.16374	1.13446
	94.26	593.28	551.69	545.95	414.36	334.41	285.18	287.67	511.78	529.46	538.11	443.32	326.76	246.98	186.52	168.77	108.38	115.75	113.3	92.9793	88.2085	83.9366	80.4507	80.6477	91.934	92.4887	92.7492	0.841121	0.829693	0.787121	0.749001	0.717895	0.719652	0.820364	0.825315	0.827639	0.187984	0.21141	0.261446	0.345957	0.413321	0.788229	0.781381	0.789448	0.0866929	0.431798	0.77411	1.08037	1.06236
	82.28	511.21	475.12	469.25	351.31	282.97	244.09	254.81	442.66	456.37	463.33	364.83	266.71	201.45	151.46	139.6	94.55	101.36	99.51	81.1126	76.6638	72.8257	69.9578	70.8116	80.2791	80.7188	80.9339	0.839049	0.827144	0.781777	0.742638	0.713393	0.7221	0.818644	0.823129	0.825321	0.222525	0.240813	0.288087	0.379491	0.452141	0.786405	0.7779	0.785229	0.0894193	0.455154	0.806587	1.09435	1.00624
	100.15	625.02	585.27	579.49	423.22	350.28	296.45	298.07	547.42	559.1	567.07	485.59	347.93	268.81	201.72	180.59	115.38	122.03	119.4	98.9048	93.0413	88.9685	85.0461	85.1789	97.9257	98.293	98.5365	0.839765	0.829324	0.780158	0.746007	0.713118	0.714232	0.821114	0.824194	0.826236	0.162039	0.177898	0.232585	0.319548	0.394136	0.789229	0.781739	0.789444	0.0785691	0.476821	0.784344	1.10835	1.09689
	89.24	553.91	519.1	509.44	384.99	313.34	269.06	276.84	482	492.96	499.44	411.21	299.36	229.03	171.76	155.88	102.17	108.89	106.46	88.0024	83.3482	79.4167	76.2368	76.8487	87.1454	87.4971	87.699	0.838891	0.827257	0.783506	0.746548	0.716655	0.722408	0.8192	0.822507	0.824405	0.19282	0.222421	0.269069	0.361629	0.436931	0.788029	0.77911	0.786841	0.0872919	0.438765	0.76776	1.05869	1.00083
	78.24	477.82	446.27	441.2	317.69	256.61	222.66	228.58	417.89	429.67	434.37	349.35	247.24	187.94	143.43	130.29	90.41	95.56	93.02	77.1909	72.2749	68.5621	65.8783	66.387	76.4449	76.8302	76.9791	0.836256	0.825043	0.772499	0.732816	0.70413	0.709568	0.817069	0.821188	0.82278	0.208182	0.221757	0.267605	0.355834	0.430003	0.783651	0.777597	0.785851	0.0830009	0.504045	0.862047	1.14596	1.09038
Day4	94.25	583.18	545.81	528.66	375.22	305.86	272.2	279.02	505.17	523.47	531.77	415.79	294.31	219.87	177.08	164.36	106.89	112.39	110.65	92.7049	86.5019	82.2043	79.5601	80.1326	91.9551	92.544	92.8001	0.838386	0.824642	0.769464	0.731236	0.707715	0.712807	0.817972	0.823211	0.825488	0.213502	0.215633	0.281142	0.349449	0.410938	0.788408	0.785298	0.791921	0.103129	0.554235	0.906689	1.14247	1.0901
	85.75	527.31	490.07	478.12	344.97	278.79	245.2	251.41	463.62	476.92	482.55	362.38	260.17	192.66	153.64	143.12	98.52	102.95	101.22	84.339	78.9628	74.8934	72.2351	72.7645	83.8762	84.3016	84.4758	0.837382	0.823603	0.771102	0.731363	0.705404	0.710574	0.819084	0.823238	0.824939	0.242073	0.245818	0.308942	0.373409	0.430731	0.787498	0.784136	0.790239	0.102882	0.528568	0.891424	1.15053	1.09741
	79.26	490.25	455.17	447.98	324.71	264.57	240.12	248.99	428.21	443.05	447.15	343.73	243.35	183.34	149.79	138.97	89.47	95.05	94.24	78.0691	73.2247	69.6541	67.8356	68.5253	77.4459	77.918	78.0438	0.838327	0.825731	0.774492	0.736727	0.717493	0.724787	0.81914	0.824133	0.825464	0.232711	0.250562	0.307026	0.376187	0.441865	0.79106	0.785464	0.789243	0.0943569	0.509809	0.853007	1.04169	0.968955
	74.3	448.48	414.07	396.45	285.42	228.14	211.47	225.59	382.37	397.02	404.08	295.29	213.45	157.69	130.67	124.72	83.92	88.45	87.62	72.7189	67.8757	64.0514	62.6645	63.8487	72.231	72.7381	72.9716	0.834329	0.816575	0.76219	0.719245	0.703672	0.71697	0.811096	0.81679	0.819413	0.255165	0.252155	0.308802	0.382087	0.447139	0.780527	0.777215	0.783162	0.13124	0.571298	0.96581	1.12077	0.988031
	93.01	578.82	539.62	519.82	343.01	284.73	256.73	267.02	508.42	520.33	525.63	411.7	268.51	204.62	164.5	153.11	106.78	113.44	111.19	91.344	83.7574	79.7704	77.4052	78.3152	90.9855	91.3598	91.5218	0.839311	0.824278	0.755817	0.719838	0.698496	0.706707	0.821043	0.82442	0.825882	0.207995	0.217195	0.281354	0.359249	0.426597	0.789977	0.781985	0.788463	0.113501	0.687473	1.03287	1.25459	1.1677
	85.29	524.42	492.77	471.07	315.64	258.48	228.49	236.48	460.98	472.6	478.77	371.5	247.69	187.17	149.47	138.7	97.84	104.13	102.17	83.7474	77.006	73.0641	70.4503	71.192	83.4228	83.7957	83.9876	0.837363	0.822219	0.756032	0.717332	0.69167	0.698951	0.819032	0.822692	0.824576	0.21137	0.215277	0.275882	0.345836	0.413481	0.787757	0.779666	0.786599	0.113253	0.66145	1.02886	1.29516	1.21761
	85.44	525.74	487.68	474.44	329.38	270.86	246.82	258.61	456.73	472.57	479.29	362.15	250.45	187.7	155.4	145.63	96.44	101.61	99.44	83.9646	77.8935	74.1071	72.1835	73.159	83.3923	83.9058	84.1152	0.837486	0.823024	0.763515	0.726401	0.707546	0.717107	0.817414	0.822448	0.8245	0.236679	0.239632	0.307022	0.370391	0.436874	0.788847	0.784984	0.792526	0.108127	0.59615	0.941003	1.13005	1.03295
	83.19	516.19	482.57	461.33	315.35	258.54	230.96	247.45	448.11	461.84	467.91	354.51	244.32	182.13	146.05	137.77	95.72	101.36	99.03	81.6257	75.4462	71.678	69.381	70.7983	81.2018	81.6416	81.8293	0.838838	0.823064	0.760754	0.722758	0.699597	0.713888	0.81879	0.823225	0.825118	0.231548	0.225242	0.295544	0.367639	0.443241	0.786392	0.78053	0.788357	0.118917	0.63688	0.996558	1.23498	1.08604
	87.39	535.7	500.77	480.97	315.01	267.32	249.79	268.37	468.72	478.23	486.8	378.48	246.65	192.93	155.8	147.31	100.06	105.37	103.66	85.7973	78.4268	75.0916	73.6399	75.1742	85.3992	85.7097	85.981	0.836868	0.821616	0.751034	0.719095	0.705193	0.719886	0.817803	0.820777	0.823375	0.21309	0.217009	0.278281	0.376276	0.451094	0.786525	0.779667	0.787058	0.113791	0.700581	1.00397	1.1446	0.996125
	84.32	513.18	485.05	457.42	297.94	250.66	226.18	236	451.75	463.07	468.28	359.95	232.46	180.25	146.67	136.89	96.68	103.3	100.51	82.6643	75.3731	71.9403	69.7729	70.6802	82.4772	82.847	83.0122	0.835691	0.819281	0.747019	0.712997	0.691516	0.700508	0.817427	0.821092	0.82273	0.213086	0.219776	0.280898	0.351534	0.419958	0.785988	0.776924	0.785363	0.121901	0.722427	1.04732	1.2689	1.17449
Day5	92.28	584.15	542.93	532.28	410.35	321.99	273.55	261.12	473.92	521.31	535.32	426.58	324.23	235.08	191.35	172.69	103.6	110.03	109.47	90.881	86.4929	81.7636	78.2452	77.1941	89.0095	90.5556	90.9692	0.842027	0.829261	0.789222	0.746068	0.713964	0.704373	0.812185	0.826292	0.830066	0.19858	0.20987	0.269915	0.300494	0.338657	0.781398	0.788936	0.795505	0.0974487	0.423541	0.814187	1.13544	1.23709
	79.52	501.38	461.94	462.36	365.39	283.26	238.54	230.16	429.65	453.35	461.39	350.77	271.36	193.22	152.16	138.16	90.85	96.32	94.84	78.4697	75.0877	70.8653	67.6905	66.9983	77.4687	78.2059	78.4417	0.841398	0.830284	0.7945	0.749823	0.71623	0.708906	0.819693	0.827493	0.829988	0.241349	0.257341	0.317871	0.36212	0.399722	0.788549	0.787537	0.794447	0.0843931	0.372178	0.770035	1.10187	1.1784
	81.98	519.84	482.66	477.18	367.95	294.2	248.05	237.35	431.61	468.18	477.17	379.56	283.74	210.75	171.43	152.76	91.87	97.88	97.45	80.8403	76.9693	73.1343	69.9014	69.0245	79.4197	80.5778	80.84	0.842298	0.830587	0.790816	0.751413	0.718196	0.709187	0.815992	0.827891	0.830585	0.204577	0.228863	0.283651	0.308889	0.356394	0.787146	0.790935	0.795775	0.0894002	0.412801	0.766961	1.09571	1.19018
	73.62	461.11	426.55	418.53	314.74	246.16	212.29	210.59	381.17	412.6	421.56	319.27	241.53	174.6	141.89	129.66	83.43	88.25	87.68	72.4433	68.5316	64.6121	62.015	61.8691	71.2348	72.2635	72.5335	0.840342	0.82691	0.78226	0.73752	0.707876	0.70621	0.813115	0.824858	0.82794	0.237163	0.232605	0.290705	0.331622	0.384301	0.781121	0.786112	0.792011	0.101737	0.465051	0.873213	1.17208	1.18961
	97.75	619.27	580.5	571.1	403.98	323.25	273.36	258.97	530.47	559.64	567.48	469.43	337.11	250.36	197.46	177.43	110.85	117.33	116.43	96.4657	90.1653	85.4047	81.476	80.1486	95.2336	96.1332	96.3618	0.842153	0.831088	0.776808	0.735794	0.701946	0.69051	0.820473	0.828223	0.830193	0.178025	0.165528	0.225491	0.277656	0.314863	0.791034	0.790347	0.79483	0.084346	0.532922	0.915762	1.2654	1.39128
	85.33	541.74	506.91	498.69	363.86	287.52	241.96	232.28	468.83	492.19	496.74	400.13	296.72	216.33	167.01	149.92	96.88	104.35	103.13	84.1853	79.2292	74.8989	71.3969	70.5296	83.2898	83.998	84.1296	0.842489	0.831187	0.782254	0.7395	0.704923	0.69636	0.822345	0.829338	0.830637	0.197638	0.184522	0.2476	0.309762	0.354572	0.793358	0.787988	0.792386	0.0863262	0.488869	0.884182	1.23897	1.33227
	86.42	549.01	508.8	503.15	389.77	302.31	262.74	255.75	451.65	491.21	504.29	397.33	300.58	216.03	173.88	161.73	98.3	104.37	104.38	85.1976	81.1982	76.5826	73.7682	73.2064	83.5838	84.8484	85.2303	0.842589	0.830671	0.791677	0.746675	0.719235	0.713758	0.814937	0.827267	0.83099	0.210315	0.228827	0.285402	0.338205	0.367625	0.782354	0.787525	0.793016	0.0911458	0.408549	0.81605	1.08956	1.14667
	78.21	497.04	464.34	455.24	336.45	264.2	223.41	216.02	418.51	448.65	455.91	355.34	268.09	193.67	153.01	137.3	89.27	94.79	94.3	77.0961	72.7464	68.6851	65.5727	64.9208	75.967	76.9048	77.1153	0.842648	0.830647	0.783782	0.740026	0.706492	0.699468	0.818482	0.828586	0.830854	0.219445	0.20318	0.266957	0.315116	0.364411	0.786696	0.788722	0.793161	0.0918197	0.477307	0.881302	1.22479	1.3009
Day6	92.12	550.03	498.34	500.59	415.47	336.35	284.03	259.72	437.93	496.02	509.39	384.61	318.83	233.98	193.19	170.21	100.86	109.31	108.67	90.621	87.3802	83.2611	79.63	77.5938	88.333	90.4701	90.9053	0.832518	0.818972	0.789683	0.752457	0.719642	0.70124	0.798294	0.817608	0.821541	0.231687	0.232604	0.304356	0.319825	0.34464	0.769689	0.779626	0.786666	0.0987635	0.323874	0.635291	0.936521	1.11778
	85.01	520.36	473.57	473.06	390.4	310.79	251.94	231.84	414.13	468.42	480.42	350.36	286.81	211.72	169.23	149.22	93.72	101.39	101.74	83.6437	80.6253	76.5745	72.4072	70.6469	81.5909	83.4975	83.8709	0.836632	0.823186	0.79348	0.753613	0.712601	0.695277	0.802983	0.821747	0.825422	0.259375	0.265343	0.318768	0.328292	0.356366	0.773694	0.783549	0.788227	0.0999873	0.332889	0.674314	1.06541	1.24448
	76.73	482.05	438.22	440.49	368.62	298.44	236.23	221.34	385.94	435.07	444.96	331.46	266.23	209.25	163.36	143.49	85.71	90.62	90.51	75.5947	73.1472	69.8861	65.8267	64.6155	73.8045	75.4334	75.7253	0.840826	0.828385	0.801565	0.765829	0.721345	0.708072	0.808767	0.826618	0.829816	0.24752	0.277766	0.298854	0.308471	0.351721	0.777919	0.791712	0.796588	0.0943495	0.307715	0.615233	1.0406	1.17787
	72.75	446.37	404.81	397.67	324.95	262.71	216.78	204.76	360.22	399.59	409.02	288.11	227.11	176.81	143.17	126.9	79.87	84.74	84.16	71.3264	68.5739	65.3087	62.041	61.0159	70.0207	71.3879	71.6832	0.837019	0.820639	0.788971	0.751404	0.713807	0.702013	0.805617	0.821347	0.824744	0.275505	0.301092	0.326977	0.339561	0.38025	0.778274	0.787933	0.79424	0.122463	0.373657	0.699098	1.05909	1.17997
	96	613.29	568.52	560.77	440.1	346.2	275.97	259.53	514.96	553.08	559.9	450.06	340.45	255.95	196.92	174.66	108.47	115.12	113.55	94.6129	90.4296	85.6559	80.5821	79.1187	93.2139	94.3915	94.5881	0.843467	0.83128	0.794525	0.752583	0.708004	0.695146	0.818988	0.829335	0.831062	0.197425	0.226426	0.260687	0.286444	0.327014	0.789362	0.791857	0.797196	0.0936569	0.393524	0.77149	1.22231	1.36308
	85.47	540.86	499.07	495.32	397.99	314.22	247.56	231.94	460.17	488.38	494.21	387.07	294.34	225.18	169.41	148.84	96.5	102.25	101.67	84.246	80.8817	76.7248	71.9915	70.6087	83.1655	84.0429	84.2138	0.841974	0.829916	0.796774	0.755824	0.709196	0.695574	0.819272	0.827915	0.829599	0.218546	0.260434	0.283368	0.315681	0.358282	0.790295	0.790634	0.794278	0.0919406	0.358979	0.721278	1.18476	1.3319
	85.28	508.89	455.28	461.11	377.48	298.67	263.25	260.34	429.03	461.04	471.2	344.41	282.58	203.17	164.96	155.88	95.82	101.33	100.54	83.8244	80.5791	76.2823	73.748	73.5178	82.7003	83.8221	84.152	0.83242	0.818212	0.786534	0.744593	0.719856	0.717609	0.807239	0.818189	0.821409	0.253085	0.251404	0.319751	0.373371	0.401245	0.776659	0.780214	0.78663	0.10362	0.348124	0.703854	0.933105	0.954713
Day7	83.39	381.42	320.77	361.82	341.2	307.81	247.08	214.34	288.07	331.26	349.53	303.21	282.23	254.2	198.94	157.92	93.32	102.27	100.16	82.4139	81.2949	79.2467	74.5304	71.2477	77.8729	80.7178	81.7591	0.78137	0.772224	0.761738	0.742547	0.698355	0.667595	0.729674	0.756331	0.766088	0.161987	0.172831	0.174166	0.194836	0.263227	0.676051	0.69127	0.713444	0.0541706	0.117878	0.239141	0.543711	0.779509
	78.09	403.36	351.68	373.77	331.66	274.32	218.39	210.46	324.75	362.9	373.44	296.92	266.69	209.8	150.68	134.82	86.57	93.96	93.53	76.9112	74.953	71.572	67.0892	66.3215	74.5943	76.4401	76.8972	0.806401	0.794228	0.774007	0.739093	0.692801	0.684873	0.770302	0.789363	0.794084	0.205608	0.195893	0.2352	0.310042	0.359403	0.733426	0.741086	0.749545	0.0791663	0.216185	0.4704	0.846971	0.916564
	82.24	437.5	382.13	406.28	364.3	302.74	251.53	240.65	368.84	400.33	408.74	329.85	296.64	233.37	171.95	154.95	90.39	97.26	97.28	81.069	79.2468	75.8899	72.2048	71.2797	79.4595	80.8293	81.1664	0.812023	0.80046	0.782468	0.749323	0.712937	0.703803	0.784569	0.798093	0.801423	0.188121	0.185726	0.229141	0.316384	0.356119	0.754934	0.75705	0.762	0.0768436	0.200933	0.445134	0.739355	0.817993
	70.03	391.99	342.92	356.31	304.77	244.81	216.12	223.11	339.1	358.29	363.96	255.38	219.88	161.87	126.57	121.97	78.24	82.93	82.53	68.7992	66.6237	63.2379	61.1413	61.688	68.1315	68.8727	69.0796	0.821347	0.806912	0.781397	0.741686	0.717096	0.723508	0.799081	0.807774	0.8102	0.283265	0.278538	0.338793	0.414353	0.453319	0.769272	0.768539	0.773244	0.100138	0.286183	0.601201	0.813761	0.756936
	103.38	641.08	596.29	578.65	424.58	340.22	291.71	278.33	549.26	585.17	594.82	459.5	332.8	249.88	205.35	187.2	117.92	127.95	126.08	101.612	95.5251	90.4776	86.6458	85.426	100.666	101.811	102.1	0.838741	0.824398	0.775013	0.734061	0.702973	0.693077	0.816724	0.826014	0.828352	0.20591	0.216167	0.265534	0.296047	0.327417	0.785311	0.781346	0.788037	0.107889	0.509916	0.88431	1.19766	1.30331
	91.61	563.68	525.14	512.42	389.1	309.2	258.68	244.57	481.93	514.38	520.58	397.25	298.48	221.39	177.21	158.46	103.7	112.96	110.86	90.1444	85.3839	80.802	76.8784	75.5824	89.1522	90.2049	90.3937	0.837479	0.824081	0.780561	0.738674	0.702805	0.690958	0.81501	0.824634	0.82636	0.224757	0.232896	0.283991	0.314945	0.352087	0.784824	0.780396	0.787045	0.100035	0.448676	0.823027	1.17906	1.30478
[truncated: 49 more columns]

## Sheet: sos2
	1	2	3	4	5	6	7	8	9	10	11	12	13	14	15	16	17	18	19	20	21	22	23	24	25	26	27	28	29	30	31	32	33	34	35	36	37	38	39	40	41	42	43	44	45	46	47	48	49
	Fo	Fm	Fp	Fm_L1	Fm_L2	Fm_L3	Fm_L4	Fm_Lss	Fm_D1	Fm_D2	Fm_D3	Ft_L1	Ft_L2	Ft_L3	Ft_L4	Ft_Lss	Ft_D1	Ft_D2	Ft_D3	Fo_L1	Fo_L2	Fo_L3	Fo_L4	Fo_Lss	Fo_D1	Fo_D2	Fo_D3	QY_max	Fv_Fm_L1	Fv_Fm_L2	Fv_Fm_L3	Fv_Fm_L4	Fv_Fm_Lss	Fv_Fm_D1	Fv_Fm_D2	Fv_Fm_D3	QY_L1	QY_L2	QY_L3	QY_L4	QY_Lss	QY_D1	QY_D2	QY_D3	NPQ_L1	NPQ_L2	NPQ_L3	NPQ_L4	NPQ_Lss
Day0	90.92	550.41	514.99	511.32	412.46	304.88	238.48	232.59	419.71	466.98	485.81	448.59	342.98	252.58	173.97	151.47	104.8	113.58	111.27	89.7862	86.1599	80.245	74.7659	74.177	86.4719	88.3137	88.9658	0.834814	0.824403	0.791107	0.736798	0.68649	0.681082	0.793972	0.810883	0.816871	0.122682	0.168453	0.171543	0.270505	0.348768	0.750304	0.756778	0.77096	0.0764492	0.334457	0.805333	1.30799	1.36644
	68.58	414.93	379.44	388.37	312.53	227.94	184.59	193.14	339.53	361.41	371.22	310.49	226.5	166.57	111.69	102.35	80.69	85.27	82.82	67.8135	65.0569	60.3916	56.8541	57.64	66.1519	66.9415	67.2708	0.834719	0.825389	0.791838	0.735055	0.691998	0.701564	0.805166	0.814777	0.818784	0.20053	0.27527	0.269238	0.394929	0.470074	0.762348	0.764063	0.776898	0.0683884	0.327649	0.820347	1.24785	1.14834
	80.66	505.78	467.23	470.44	384.63	285.47	225.14	221.38	396.37	432.54	447.24	399.91	305.92	226.56	154.74	135	95.06	102.01	100.71	79.7051	76.8021	71.8207	67.2845	66.9447	77.259	78.5392	79.0107	0.840524	0.830573	0.800322	0.748413	0.701144	0.697603	0.805084	0.818423	0.823337	0.149923	0.204638	0.206361	0.312694	0.390189	0.760174	0.764161	0.774819	0.0751212	0.314978	0.771745	1.24651	1.28467
	67.78	417.9	383.16	388.26	314.45	233.93	182.52	186.75	333.59	361.43	373.61	314.59	234.35	174.76	116.58	104.94	79.77	85.49	84.4	66.951	64.3465	60.1125	56.0552	56.4479	65.111	66.1048	66.5014	0.837808	0.827561	0.795368	0.743032	0.692882	0.697735	0.804817	0.817102	0.822003	0.189744	0.25473	0.252939	0.361275	0.438072	0.760874	0.763467	0.774096	0.0763406	0.328987	0.786432	1.28961	1.23775
	82.54	513.74	475.61	479.97	383.26	281.82	226.24	224.93	404.35	443.79	458.13	402.91	300.84	219.64	151.12	132.13	96.57	103.08	101.81	81.6174	78.2594	72.9012	68.5452	68.4245	79.1018	80.5014	80.9611	0.839335	0.829953	0.795806	0.74132	0.697024	0.695797	0.804373	0.818605	0.823279	0.160552	0.21505	0.220637	0.332037	0.412573	0.761172	0.767728	0.777771	0.0703586	0.340448	0.822937	1.27077	1.284
	67.32	413.65	378.99	387.38	317.12	231.86	183.6	190.9	332.58	362.33	373.34	311.52	226.48	166.18	112.23	101.23	79.63	84.42	83.21	66.5851	64.1424	59.702	55.9173	56.5762	64.7512	65.8032	66.1575	0.837254	0.828114	0.797735	0.742509	0.695439	0.703634	0.805306	0.818389	0.822796	0.195828	0.285822	0.283274	0.388725	0.469722	0.760569	0.767008	0.77712	0.0678145	0.304396	0.784051	1.253	1.16684
	78.13	471.2	436.52	441.35	366.27	277.2	219.31	214.9	370.72	404.41	416.97	377.28	295.18	223.94	152.99	132.55	90.52	96.49	93.97	77.2635	74.587	70.0062	65.631	65.2304	74.7697	76.0475	76.4807	0.834189	0.824938	0.796361	0.747452	0.700739	0.696461	0.798312	0.811954	0.81658	0.145168	0.194092	0.192136	0.302403	0.383201	0.755826	0.761406	0.774636	0.0676334	0.286483	0.699856	1.14856	1.19265
	72.71	439.6	410	410.66	337.19	245.8	189.61	187.09	341.32	374.98	389.28	345.25	261.66	194.67	129.15	112.76	84.56	91.23	88.72	71.8723	69.2321	64.3218	59.6927	59.4407	69.4046	70.695	71.188	0.8346	0.824984	0.794679	0.738316	0.685181	0.682288	0.796658	0.81147	0.817129	0.15928	0.223998	0.208015	0.318865	0.397295	0.752256	0.756707	0.772092	0.0704719	0.303716	0.788446	1.31844	1.34967
	73.29	452.17	414.84	423.67	356.95	266.93	205.81	204.79	359.46	390.88	400.19	353.02	270.6	204.49	135.93	118.62	86.11	90.54	89.01	72.4995	70.2524	65.8798	61.3809	61.2898	70.3491	71.4735	71.7788	0.837915	0.828877	0.803187	0.753195	0.70176	0.700719	0.804292	0.817147	0.820638	0.166757	0.241911	0.233919	0.339536	0.420772	0.760446	0.768369	0.777581	0.0672693	0.26676	0.693965	1.19703	1.20797
	80.62	499.48	468.89	467.57	385.35	276	211.33	205.58	381.83	424.88	440.07	399.15	303.37	221.09	146.02	126.42	95.11	101.76	100.98	79.7416	76.9418	71.3014	66.0776	65.5047	76.8005	78.3982	78.9007	0.838592	0.829455	0.800333	0.741662	0.687325	0.681366	0.798862	0.815482	0.820709	0.146331	0.212742	0.198949	0.309043	0.385057	0.75091	0.760497	0.770537	0.0682465	0.296172	0.80971	1.36351	1.42961
	81.26	515.98	478.68	481.25	392.63	283.4	218.85	213.14	391.82	439.65	457.6	414.17	314.83	230.02	153.69	133.14	96.12	103.33	101.61	80.3468	77.4291	71.9595	66.9458	66.4016	77.3975	79.0973	79.6595	0.842513	0.833046	0.802794	0.746085	0.694102	0.68846	0.802467	0.82009	0.825919	0.139387	0.198151	0.188356	0.297738	0.37534	0.754683	0.764972	0.77795	0.0721662	0.314163	0.820677	1.35769	1.42085
	55.6	336.67	303.52	310.55	258.47	193.64	150.14	152.53	263.3	287.79	296.72	247.17	184.62	140.91	93.82	85.16	64.79	69.17	68.32	54.8383	52.9541	49.5551	46.1344	46.3576	53.1539	54.083	54.3906	0.834853	0.823416	0.795125	0.744087	0.692724	0.696075	0.798124	0.812075	0.816694	0.20409	0.28572	0.272309	0.375117	0.441684	0.753931	0.759651	0.769749	0.0841088	0.30255	0.738639	1.24237	1.20724
Day1	88.78	539.49	506.87	504.59	422.51	346.21	281.39	271.35	446.74	470.94	482.69	436.55	339.16	274.02	192.21	166.64	101.82	110.14	108.11	87.7809	84.9112	81.31	77.1368	76.3623	85.847	86.7031	87.0935	0.835437	0.826035	0.799031	0.765143	0.725872	0.718584	0.807837	0.815893	0.819566	0.134842	0.197273	0.208515	0.316927	0.385885	0.772082	0.766127	0.776026	0.0691651	0.276869	0.558274	0.917232	0.98817
	75.69	467.24	436.61	437.65	368.25	299.36	243.35	247.82	393.35	409.06	419.88	360.34	270.79	219.41	149.11	134.02	87.72	94.8	92.44	74.87	72.5315	69.3865	65.8724	66.1956	73.4548	73.9854	74.3318	0.838006	0.828927	0.803037	0.768217	0.72931	0.732888	0.813259	0.819133	0.822969	0.176648	0.264657	0.26707	0.387261	0.459204	0.776993	0.768249	0.779842	0.0676111	0.268812	0.560796	0.920033	0.885401
	85.3	537.07	504.44	503.93	429.74	340.63	270.51	257.46	433.25	467.58	480.69	433.37	343.7	273.37	185.66	159.7	99.11	107.01	104.28	84.4183	82.0455	78.1426	73.7567	72.7512	82.1726	83.333	83.74	0.841175	0.83248	0.809081	0.770594	0.727342	0.717427	0.810335	0.821778	0.825792	0.140019	0.200214	0.197458	0.313667	0.379709	0.771241	0.771141	0.783062	0.0657631	0.249756	0.576696	0.985398	1.08603
	65.36	403.48	373.65	376.3	319.8	255.65	205.04	207.94	335.19	352.14	361.19	302.79	229.57	184.28	123.18	112.96	76.99	81.68	78.94	64.6041	62.7022	59.762	56.5018	56.7198	63.2718	63.852	64.1434	0.838009	0.828318	0.803933	0.766235	0.724435	0.72723	0.811236	0.818674	0.822411	0.195349	0.282145	0.279171	0.399239	0.456766	0.770309	0.768047	0.781445	0.0722296	0.261664	0.578252	0.967811	0.940367
	91.82	579.52	542.89	544.29	457.62	366.71	292.51	291.46	478.34	505.51	518	462.2	361.68	281.83	190.16	166.94	107.3	114.69	112.45	90.8879	88.1016	84.0883	79.466	79.3883	88.8425	89.7384	90.1241	0.841559	0.833016	0.807479	0.770695	0.728331	0.727618	0.814269	0.82248	0.826015	0.15082	0.20965	0.231464	0.349903	0.427228	0.775683	0.77312	0.782915	0.0647265	0.266378	0.580322	0.981197	0.988335
	86.41	541.16	508.51	507.74	431.05	341.63	269.5	272.31	442.88	472.3	485.53	427.6	333.06	257.55	169.09	151.53	100.85	108.56	106.12	85.5113	83.0236	79.0389	74.4301	74.6428	83.4529	84.4441	84.8575	0.840324	0.831585	0.807392	0.768642	0.723822	0.72589	0.811568	0.821207	0.825227	0.157837	0.227329	0.246114	0.372579	0.443539	0.772286	0.770146	0.781435	0.0658211	0.255446	0.584053	1.00801	0.987294
	75.36	463.68	430.83	433.44	366.65	298.32	240.82	234.68	391.33	408.8	416.85	367.26	280.8	230.9	158.62	138.33	86.97	93.15	91.02	74.5151	72.2524	69.132	65.5074	65.0445	73.1616	73.7509	74.0087	0.837474	0.828084	0.802939	0.768262	0.727982	0.722838	0.813044	0.819592	0.822457	0.152685	0.234147	0.225999	0.341334	0.410559	0.777758	0.772138	0.781648	0.0697674	0.264639	0.554304	0.925421	0.975797
	63.05	382.04	355.24	355.66	297.57	238.4	191.13	192.87	317.77	334.13	342.47	288.78	213.35	175.13	118.11	106.76	72.66	77.62	76	62.2875	60.2284	57.3476	54.1274	54.266	61.0134	61.5925	61.8702	0.834965	0.824868	0.797599	0.759448	0.716803	0.718639	0.807995	0.815663	0.819341	0.188045	0.283026	0.265394	0.382044	0.446467	0.771344	0.767695	0.778083	0.074172	0.283866	0.602517	0.998849	0.980816
	88.49	558.84	522.28	524.56	451.8	358.25	278.63	268.36	452.66	488.17	500.33	453.43	356.69	286.31	187.98	161.75	102.11	111.24	107.96	87.5837	85.2903	81.2834	76.3342	75.5422	85.3209	86.507	86.8812	0.841654	0.833034	0.811221	0.77311	0.726037	0.718504	0.811512	0.822793	0.826352	0.135599	0.210514	0.200809	0.325342	0.397265	0.774422	0.772129	0.784222	0.06535	0.236919	0.559916	1.00567	1.08243
	76.69	479.31	447.28	449.38	386.39	303.27	235.41	228.18	384.49	417.6	429.43	378.91	296.52	236.33	154.62	133.18	89.37	98.45	94.86	75.8814	73.8485	70.1726	65.7848	65.2074	73.7788	74.9186	75.2907	0.839999	0.831142	0.808876	0.768613	0.720552	0.714228	0.808113	0.820597	0.824673	0.156816	0.232589	0.220727	0.343188	0.416338	0.767562	0.764248	0.779103	0.0666029	0.240482	0.580473	1.03606	1.10058
	77.24	486.1	452.94	456.17	390.31	303.58	234.13	229.35	393.46	424.51	437.35	386.12	303.63	238.35	155.97	135.49	88.71	96.13	94	76.443	74.341	70.5045	65.9604	65.5754	74.4545	75.4995	75.8958	0.841103	0.832424	0.809534	0.767756	0.718274	0.714081	0.81077	0.822149	0.826464	0.153561	0.22208	0.214869	0.333832	0.409244	0.774539	0.773551	0.785069	0.0656115	0.24542	0.601225	1.0762	1.11947
	66.66	409.09	382.85	382.66	330.07	258.01	196.16	191.79	326.6	353.65	366.05	319.27	249.07	199.22	128.08	112.3	76.45	82.71	81.32	65.9181	64.1572	60.8536	56.6414	56.2712	64.025	64.9996	65.4069	0.837053	0.827737	0.805625	0.764142	0.711249	0.7066	0.803965	0.816204	0.821317	0.165656	0.245402	0.227859	0.347064	0.414464	0.765922	0.766125	0.777845	0.0690691	0.239404	0.585559	1.08549	1.13301
Day2	88.59	535.02	504.73	499.33	398.91	310	276.86	290.09	463.73	478.68	484.88	413.81	300.33	231.63	180.58	167.2	103.2	110.09	108.11	87.5538	83.8525	79.0847	76.7413	77.7238	86.3909	86.8965	87.0987	0.834417	0.824657	0.789796	0.744888	0.722816	0.73207	0.813704	0.818466	0.820371	0.17127	0.247123	0.252806	0.347757	0.423627	0.777457	0.770013	0.777038	0.0714758	0.341205	0.725871	0.932457	0.844324
	81.22	499.08	470.9	466.77	379.94	290.45	257.23	277.12	429.28	443.92	450.66	377.96	268.93	209.23	157.7	147.89	95.41	102.74	101.02	80.3153	77.2765	72.7194	70.4418	71.8541	79.1262	79.6102	79.8243	0.837261	0.827934	0.796609	0.749632	0.726153	0.740711	0.815677	0.820666	0.822873	0.190265	0.292178	0.279635	0.38693	0.466332	0.777744	0.768562	0.77584	0.0692204	0.313576	0.718299	0.940209	0.800953
	97.58	602.11	569.8	561.9	465.82	360.28	312.17	321.86	508.32	534.4	545.19	478.66	358.41	276.52	208.22	189.68	113.5	124.54	120.81	96.4613	93.1625	88.0065	84.8136	85.5131	94.7469	95.6166	95.9564	0.837937	0.82833	0.800003	0.755727	0.728309	0.734316	0.813608	0.821077	0.823995	0.14814	0.230583	0.232486	0.332992	0.410675	0.776715	0.766954	0.778408	0.0715608	0.292581	0.671228	0.928789	0.87072
	85.35	519.12	491.37	484.68	402.77	309.27	266.03	282.08	442.7	462.1	470.58	399.43	294.16	226.86	167.21	154.58	98.7	108.8	105.93	84.3644	81.4801	76.784	73.8056	74.9894	82.9945	83.6529	83.9267	0.835587	0.825938	0.797701	0.751725	0.722566	0.734156	0.812527	0.818972	0.821653	0.175889	0.269658	0.266466	0.371462	0.451999	0.77705	0.764553	0.774895	0.0710572	0.288875	0.678533	0.951359	0.840329
	90.94	558.85	522.96	522.71	423.68	328.91	288.62	305.5	479.5	497.69	507.33	429.73	314.53	239.83	182.22	170.17	106.58	114.14	112.77	89.9282	86.4518	81.6512	78.9164	80.127	88.5553	89.1571	89.4616	0.837273	0.827958	0.79595	0.751752	0.726573	0.737719	0.815317	0.820858	0.823662	0.177881	0.257624	0.270834	0.368651	0.442979	0.777727	0.77066	0.777719	0.0691397	0.319038	0.699097	0.936283	0.829296
	83.4	504.82	472.94	472.28	385.75	293.53	261.23	284.08	435.09	452.49	461.64	378.56	273.67	205.89	156.3	149.49	97.12	104.59	102.8	82.4614	79.3534	74.5361	72.2671	73.9118	81.2488	81.8364	82.1308	0.834793	0.825397	0.794288	0.74607	0.723358	0.73982	0.81326	0.819142	0.822089	0.198442	0.290551	0.298573	0.401677	0.473775	0.776782	0.768857	0.777316	0.0688998	0.308671	0.719824	0.932473	0.777035
	96.58	591.53	563.76	554.06	451.6	349.4	301.86	306.78	506.33	527.63	536.56	475.6	355	273.76	209.81	189.74	112.65	122.44	118.59	95.5252	91.9293	86.7632	83.4977	83.8698	93.9975	94.7073	94.9911	0.836728	0.82759	0.796437	0.75168	0.723389	0.726613	0.814355	0.820504	0.822963	0.141609	0.213906	0.216485	0.304943	0.381511	0.777517	0.767943	0.778981	0.0676281	0.309854	0.692988	0.959617	0.92819
	79.66	477.16	453.54	443.9	361.93	276.26	241.19	255.61	410.38	424.26	430.55	366.18	263.17	204.84	153.76	142.79	92.87	100.86	97.5	78.6759	75.6396	71.0359	68.4757	69.5903	77.5531	78.0356	78.2459	0.833054	0.822762	0.79101	0.742866	0.716092	0.727748	0.811021	0.816067	0.818265	0.175084	0.27287	0.258525	0.362494	0.441376	0.773698	0.762268	0.773545	0.0749268	0.318376	0.727213	0.978357	0.86675
	92.89	572.38	541.65	534.81	443.63	335.94	289.35	300.46	486.11	510.83	518.51	455.19	338.04	257.4	191.58	175.84	108.53	118.42	115.48	91.8429	88.7118	83.3677	80.1645	80.9942	90.2896	91.1085	91.3498	0.837713	0.82827	0.800032	0.751838	0.72295	0.730433	0.814261	0.821646	0.823823	0.148875	0.238014	0.233792	0.337895	0.414764	0.776738	0.768181	0.777285	0.0702492	0.290219	0.703816	0.978158	0.905012
	79.69	485.51	454.67	454.01	378.49	292.7	259.21	280.53	417.81	434.59	442.6	363.2	263.83	205.4	153.04	144.32	94.28	101.93	99.69	78.7927	76.1556	71.9145	69.7019	71.1561	77.6255	78.1864	78.4418	0.835863	0.826452	0.798791	0.754306	0.731099	0.746351	0.814209	0.820092	0.822771	0.200018	0.302941	0.298258	0.409591	0.485545	0.774347	0.765457	0.774763	0.0693817	0.282755	0.658729	0.873037	0.730688
	101.13	629.05	599.05	586.56	486.31	372.97	315.92	321.1	523.95	556.78	568.29	506.51	388.7	294.74	220.85	200.83	118.98	129.98	126.61	99.9658	96.573	91.0768	87.2302	87.6205	97.9706	99.0628	99.4211	0.839234	0.829573	0.801417	0.755807	0.723885	0.727124	0.813015	0.822079	0.825052	0.136474	0.200716	0.209749	0.300931	0.374556	0.772917	0.766551	0.777209	0.0724393	0.293516	0.686597	0.991169	0.959047
	72.55	447.55	420.27	416.92	354.92	274.57	236.76	253.98	381.56	399.46	406.02	334.42	247.04	192.57	141.13	132.72	86.12	94.57	91.46	71.6961	69.6052	65.8273	63.3999	64.5723	70.5715	71.1613	71.3667	0.837895	0.828034	0.803885	0.760253	0.732219	0.745759	0.815045	0.821856	0.824229	0.19788	0.303956	0.298649	0.403911	0.477439	0.774295	0.763255	0.77474	0.0734673	0.260988	0.630003	0.890311	0.762147
Day3	93.06	582.5	548.98	544.63	421.99	332.07	288.48	297.95	508.65	521.04	525.96	454.52	333.16	252.08	189.94	172.57	106.85	113.13	110.19	92.0376	87.729	83.0535	80.0291	80.741	90.9504	91.3388	91.4888	0.84024	0.831009	0.792106	0.749892	0.722584	0.729012	0.821193	0.824699	0.826054	0.165452	0.210503	0.240883	0.341583	0.420809	0.789934	0.782877	0.790497	0.0695334	0.380364	0.754148	1.0192	0.955026
	81.02	507.37	474.06	471.51	367.27	291.66	260.46	281.51	436.86	449.27	456.59	374.74	277.97	207.98	156.19	147.92	93.1	98.96	96.58	80.0478	76.3681	72.462	70.3678	71.8187	78.9843	79.3807	79.6062	0.840314	0.830231	0.792066	0.751553	0.729833	0.744881	0.8192	0.823312	0.825651	0.205234	0.243145	0.286909	0.40033	0.474548	0.786888	0.779732	0.788475	0.0760535	0.381463	0.739594	0.947977	0.802316
	101.5	629.79	592.46	586.28	459.15	368.17	322.62	341.57	538.83	557.04	568	489.18	367.07	273.45	205.44	189.62	114.85	122.44	119.38	100.3	95.7641	91.0703	87.9971	89.3492	98.8117	99.4076	99.7511	0.838835	0.828921	0.791432	0.75264	0.727242	0.738416	0.816618	0.821543	0.824382	0.165621	0.200544	0.257272	0.363214	0.444858	0.786853	0.780195	0.789824	0.0742137	0.371643	0.710596	0.952111	0.843809
	93.68	574.69	542.87	533.13	419.19	335.87	293.36	317.22	491.74	508.98	519.37	437.16	331.29	245.38	182.33	171.23	106.72	113.51	111.4	92.5045	88.3383	83.9496	81.0153	82.7338	91.173	91.7492	92.0812	0.83699	0.826488	0.789264	0.750053	0.723837	0.739191	0.814591	0.819739	0.822706	0.180012	0.20969	0.26942	0.378477	0.460217	0.782975	0.776985	0.785509	0.0779547	0.370954	0.711049	0.958992	0.811645
	83.43	518.14	478.54	482.46	373.35	296.69	271.29	298.28	447.49	458.76	466.85	382.6	281.1	207.81	159.51	152.78	94.97	100.1	98.86	82.4482	78.5264	74.4788	72.7685	74.5786	81.3617	81.7267	81.9798	0.838982	0.829109	0.789671	0.748968	0.731769	0.749971	0.818182	0.821853	0.824398	0.206981	0.247087	0.299572	0.412031	0.487797	0.787772	0.781803	0.78824	0.0739543	0.387813	0.746402	0.909912	0.737093
	75.83	468.7	432.7	436.97	340.22	266.6	245.12	275.56	406.58	416.67	423.8	336.86	247.72	180.48	138.05	135.89	86.87	90.84	89.77	74.9495	71.4638	67.5458	66.0787	68.1069	74.0008	74.3284	74.5521	0.838212	0.828479	0.789948	0.74664	0.730423	0.752842	0.817992	0.821613	0.824087	0.2291	0.271883	0.323031	0.436806	0.506859	0.78634	0.781986	0.788178	0.0726137	0.377638	0.758065	0.912125	0.7009
	107.38	670.82	638.57	624.07	483.86	379.83	325.67	328.36	582.51	599.12	606.74	540.82	392.55	299.17	227.43	204.46	122.95	130.27	127.11	106.108	101.125	95.6502	91.8054	92.0179	104.836	105.362	105.595	0.839927	0.829975	0.791003	0.748176	0.718103	0.719765	0.820027	0.824139	0.825964	0.133398	0.188712	0.212358	0.301655	0.37733	0.788931	0.782564	0.790503	0.0749115	0.386393	0.766106	1.05982	1.04294
	87.73	543.65	511.56	504.59	384.72	303.67	270.42	291.95	471.05	482.76	491.27	414.75	291.68	221.71	168.83	158.68	100.84	106.78	104.47	86.6476	82.2471	77.8075	75.431	77.0153	85.601	85.98	86.2461	0.838628	0.828281	0.786216	0.743776	0.72106	0.736204	0.818276	0.821899	0.824443	0.178046	0.241838	0.269898	0.375675	0.456482	0.785925	0.778813	0.787347	0.0774094	0.413106	0.790266	1.01039	0.862134
	97.24	608.81	573.03	566.76	438.52	347.69	309.13	325.55	525.32	538.87	548.76	475.03	346.18	258.73	197.32	183.51	112.04	117.94	115.38	96.1012	91.561	86.8251	84.2022	85.3752	94.8327	95.2651	95.5696	0.840279	0.830438	0.791205	0.75028	0.727615	0.737751	0.819476	0.823213	0.825844	0.16185	0.210572	0.25586	0.361692	0.436308	0.78672	0.781135	0.789744	0.0741937	0.388329	0.751014	0.96943	0.870097
	83.37	512.7	478.34	475.31	368.72	295.03	271.43	296.44	440.36	453.42	460.91	376.9	274.33	205.06	159.48	153.66	96.19	100.47	99.23	82.317	78.3923	74.4394	72.8414	74.5288	81.2009	81.6345	81.874	0.83739	0.826814	0.787393	0.747689	0.731638	0.748587	0.815603	0.819958	0.822364	0.207044	0.255994	0.304952	0.412445	0.481649	0.781565	0.778417	0.784709	0.0786645	0.390486	0.737789	0.888885	0.729524
	81.06	490.36	456.08	454.72	348.46	279.71	258.94	291.34	424.52	435.2	443.95	352.15	252.58	186.09	143.88	141.55	92.97	96.74	95.48	80.0232	75.9475	72.0858	70.6259	72.8351	79.0337	79.3965	79.683	0.834693	0.824017	0.782048	0.742284	0.72725	0.75	0.813828	0.817563	0.820514	0.225567	0.275154	0.334704	0.44435	0.514142	0.781	0.777711	0.784931	0.0783779	0.40722	0.753101	0.893721	0.683119
Day4	104.44	647	614.52	582.57	390.72	323.02	295.02	315.1	554.42	571.37	582.38	479.01	314.92	241.61	193.32	181.17	119.14	127.29	124.18	102.608	94.4407	89.8871	87.5743	89.2628	101.699	102.255	102.602	0.838578	0.82387	0.758291	0.721729	0.703158	0.716716	0.816567	0.821035	0.823822	0.177764	0.194001	0.252028	0.344722	0.42504	0.785109	0.77722	0.786772	0.110596	0.655917	1.00297	1.19307	1.05332
	81.95	506.15	467.79	459.79	319.62	262.73	253.13	289.51	435.64	445.93	455.24	339.36	230.21	171.85	140.03	139.05	94.13	98.77	97.09	80.6337	74.8751	71.2603	70.5348	73.0942	79.8573	80.1965	80.4926	0.838091	0.824629	0.765737	0.72877	0.72135	0.747524	0.81669	0.820159	0.823187	0.261924	0.279738	0.345906	0.446806	0.519706	0.783927	0.778508	0.786728	0.100829	0.583599	0.926502	0.999565	0.748299
	99.46	621.91	585.7	562.14	390.04	317.64	290.45	311.68	526.42	545.48	560.02	456.13	314.29	234.69	187.42	176.76	113.58	121.15	119.44	97.797	90.825	86.2473	84.1094	85.8018	96.656	97.2801	97.7327	0.840073	0.826027	0.767139	0.728475	0.710417	0.724712	0.81639	0.821661	0.825484	0.188583	0.194211	0.261145	0.354725	0.43288	0.784241	0.777902	0.786722	0.106326	0.594477	0.957908	1.14119	0.995348
	80.78	497.06	460.93	454.12	317.77	260.09	248.56	283.03	430.2	439.83	449.09	338.23	235.4	172.92	139.58	138.36	92.67	98.75	96.8	79.5574	73.9951	70.3616	69.4896	71.939	78.79	79.1072	79.4016	0.837484	0.82481	0.767142	0.729472	0.720431	0.745826	0.816853	0.820141	0.823194	0.255197	0.259213	0.335153	0.438445	0.511147	0.784589	0.775481	0.784453	0.0945565	0.564213	0.911108	0.999759	0.75621
	88.57	548.17	508.52	497.72	339.51	282.18	270.21	302.91	471.88	484.2	495.78	380.57	259.18	194.65	160.02	155.74	101.17	107.25	105.29	87.1428	80.5693	76.8634	75.947	78.3235	86.3153	86.7189	87.0832	0.838426	0.824916	0.762689	0.727609	0.718933	0.74143	0.817082	0.820903	0.824351	0.235373	0.236606	0.310192	0.407794	0.485854	0.785602	0.778501	0.787628	0.101362	0.614592	0.942625	1.02868	0.809679
	80.56	496.38	458.95	450.33	307.7	252.72	240.8	264.39	428.64	443.22	451.04	334.08	228.54	170.27	142.25	138.23	92.79	98.4	96.34	79.2449	73.2684	69.6599	68.7222	70.5178	78.5454	79.0218	79.2668	0.837705	0.824029	0.761884	0.72436	0.714609	0.733281	0.816757	0.82171	0.824258	0.258144	0.257264	0.32625	0.409261	0.477174	0.783525	0.777988	0.786405	0.102258	0.613195	0.96415	1.06138	0.877454
	97.77	607.36	574.09	552.14	370.64	307.09	283.11	308.03	528.49	540.51	550.07	448.03	294.97	224.91	180.5	171.94	111.1	119.7	116.92	96.2209	88.6552	84.4738	82.5504	84.5448	95.4763	95.8615	96.1579	0.839025	0.825731	0.760805	0.724922	0.708416	0.725531	0.819341	0.822646	0.82519	0.188557	0.20416	0.267609	0.362439	0.441808	0.789778	0.778542	0.787445	0.100011	0.638679	0.977792	1.14531	0.971756
	89.98	552.95	520.97	500.57	332.9	275.96	260.59	294.57	478.76	488.38	499.59	394.24	257.47	194.76	157.13	154.38	102.18	109.72	107.05	88.4735	81.2413	77.3466	76.0888	78.7409	87.7668	88.0849	88.4428	0.837273	0.823255	0.755959	0.719718	0.708013	0.732692	0.816679	0.819639	0.822969	0.212418	0.226585	0.294246	0.397022	0.475914	0.786574	0.775339	0.785724	0.104641	0.661009	1.00373	1.12192	0.877143
	92.5	575.7	539.33	523.23	348.96	291.73	280.46	314.85	496.67	508.33	518.6	411.33	269.94	204.04	167.07	163.25	105.74	112.79	110.66	91.0332	83.7559	79.9896	79.1179	81.6332	90.1941	90.5713	90.892	0.839326	0.826017	0.759984	0.725809	0.7179	0.740723	0.818402	0.821826	0.824736	0.213864	0.226444	0.300586	0.4043	0.481499	0.787102	0.778117	0.786618	0.100281	0.649759	0.9734	1.0527	0.82849
	84.53	514.94	479.29	466.4	313	259.88	256.62	296.31	444.81	455.66	466.9	346.93	232.46	172.12	144.78	145.28	95.58	101.35	100.57	83.1101	76.4349	72.801	72.5428	75.3978	82.3975	82.7625	83.126	0.835845	0.821805	0.755799	0.719867	0.717314	0.745544	0.814758	0.818368	0.821962	0.256154	0.257316	0.337694	0.435819	0.509703	0.785122	0.777575	0.784601	0.104074	0.645176	0.981453	1.00662	0.737842
Day5	93.56	599.95	567.14	555.91	432.3	338.41	288.78	292.76	508.89	530.36	538.67	467.55	350.01	258.63	195.72	175.91	106.61	113.8	112.37	92.4182	88.2244	83.4967	80.1002	80.4034	91.0201	91.6839	91.9291	0.844054	0.833753	0.795919	0.753268	0.722626	0.725361	0.82114	0.827129	0.829341	0.158947	0.190354	0.23575	0.322252	0.399132	0.790505	0.785429	0.791394	0.0792215	0.387809	0.77285	1.07753	1.04929
	80.05	510	476.41	475.35	374.59	291.22	250.52	264.95	438.97	455.03	461.59	377.56	283.43	203.75	151.38	139.75	91.23	97.13	95.73	79.1445	75.7519	71.6064	68.8558	69.9022	78.0673	78.5604	78.7536	0.843039	0.833503	0.797774	0.754116	0.725149	0.736168	0.822158	0.827351	0.829386	0.205722	0.243359	0.300357	0.395737	0.472542	0.792173	0.786542	0.792608	0.0728937	0.361489	0.751253	1.03577	0.924891
	98.33	621.7	589.08	575.78	451.12	349.96	292.69	290.84	513.33	551.95	562.97	478.94	369.07	267.77	202.04	182.76	109.94	116.88	115.9	97.1051	92.7812	87.5748	83.4869	83.3357	95.1528	96.4032	96.7339	0.841837	0.83135	0.794331	0.749758	0.71476	0.713465	0.814636	0.825341	0.828172	0.168189	0.181881	0.234855	0.309713	0.371613	0.78583	0.788242	0.794128	0.0797527	0.378126	0.776489	1.12409	1.1376
	77.1	481.92	450.62	447.37	349.26	270.12	231.56	239.13	408.77	432.78	439.11	350.37	264.33	189.79	144.66	133.97	86.84	92.44	91.11	76.159	72.6832	68.5063	65.7304	66.3264	74.9541	75.7244	75.9159	0.840015	0.829763	0.791894	0.746386	0.716141	0.722635	0.816635	0.825028	0.827114	0.216823	0.243171	0.297386	0.375281	0.439761	0.787558	0.786404	0.792512	0.0772291	0.379832	0.784096	1.08119	1.01531
	91.77	573.55	537.1	527.99	390.41	307.99	264.91	265.35	477.19	512.1	521.64	423.01	310.41	225.32	177.9	163.3	101.58	109.35	108.56	90.5202	85.3629	80.6443	77.3506	77.3881	88.8977	90.0412	90.3317	0.839997	0.828557	0.781351	0.738159	0.708012	0.708355	0.813706	0.824173	0.826831	0.19883	0.204913	0.268418	0.328451	0.384586	0.787129	0.786467	0.791887	0.0862895	0.469097	0.862236	1.16507	1.16148
	69.22	413.78	373.61	376.32	287.84	231.1	209.1	210.83	349.88	373.42	381.07	265.41	189.7	143.15	121.28	113.97	75.72	80.94	81.42	68.0862	64.4991	61.1356	59.4801	59.6192	67.1679	67.9907	68.2401	0.832713	0.819074	0.77592	0.735458	0.715542	0.717216	0.808026	0.817924	0.820925	0.294723	0.340953	0.380571	0.41999	0.459422	0.783583	0.783247	0.786338	0.0995429	0.437535	0.79048	0.978862	0.962624
	97.11	617.65	586.84	571.04	419.31	329.23	280.31	287.06	529.84	550.17	558.85	482.39	346.24	254.11	193.73	177.51	111.08	119.16	116.57	95.8796	90.3879	85.3537	81.6591	82.2223	94.6439	95.2727	95.5297	0.842775	0.832097	0.784437	0.740747	0.708683	0.713571	0.821373	0.82683	0.82906	0.155243	0.174262	0.228169	0.308872	0.381628	0.790352	0.783412	0.791411	0.081623	0.473015	0.876044	1.20345	1.15164
	83.72	525.22	493.7	488.03	360.2	280.68	244.02	262.93	457.02	470.07	477.79	389.34	276.47	199.23	151.62	142.83	95.22	101.93	99.88	82.7153	78.0223	73.5111	70.7282	72.2339	81.7748	82.1831	82.4159	0.8406	0.830512	0.783392	0.738096	0.710154	0.725273	0.821069	0.825168	0.827506	0.202221	0.232454	0.290188	0.378657	0.456776	0.79165	0.78316	0.790954	0.0762043	0.458134	0.871241	1.15236	0.997566
Day6	95.1	610.17	578.1	570.4	458.82	356.63	296.12	293.06	505.55	542.42	552.83	485.23	389.79	285.18	209.74	184.15	106.22	114.56	112.96	94.0777	90.4497	85.6136	81.6102	81.376	92.1285	93.284	93.5871	0.844142	0.835067	0.802864	0.759937	0.724402	0.722323	0.817766	0.828023	0.830713	0.149316	0.150451	0.200348	0.291706	0.37163	0.789892	0.788798	0.79567	0.069723	0.329868	0.710933	1.06055	1.08207
	80.34	514.53	480.87	481.84	396.76	306.63	252.42	251.5	428.98	459.38	466.49	389.39	312.2	230.13	164.21	144.72	89.75	97.49	96.2	79.4979	76.7814	72.6489	69.1313	69.0621	77.9138	78.8617	79.0686	0.843858	0.835012	0.806479	0.763073	0.726126	0.725399	0.818374	0.82833	0.830503	0.191869	0.213126	0.249486	0.349457	0.424573	0.790783	0.787779	0.793779	0.0678441	0.296829	0.678016	1.03839	1.04584
	94.79	610.77	575.33	570.03	475.65	367.92	294.61	279.08	477.32	540.51	553.9	479.81	389.54	290.83	213.96	187.34	105.53	112.77	112.66	93.7501	90.7874	85.982	81.2567	80.0284	90.8481	92.9155	93.3033	0.844802	0.835535	0.80913	0.766302	0.724189	0.713242	0.809671	0.828097	0.831552	0.158272	0.181036	0.209529	0.273752	0.328723	0.778911	0.791364	0.796606	0.0714699	0.284074	0.660062	1.07315	1.18851
	85.45	541.31	509.14	504.9	419.48	325.4	258.68	243.05	422.4	479.28	492.02	417.23	335.24	251.04	186.7	161.63	95.3	102.42	101.98	84.4882	81.7041	77.3484	72.8801	71.5832	81.8143	83.7392	84.1197	0.842142	0.832663	0.805225	0.762298	0.718261	0.70548	0.806311	0.825281	0.829032	0.173638	0.20082	0.228519	0.278259	0.334993	0.774384	0.786304	0.792732	0.0721133	0.290431	0.663522	1.09259	1.22715
	84.32	536.6	494.15	498.38	401.71	308.94	251.92	239.45	416.91	473.5	486.64	398.97	315.09	228.82	174.99	155.73	93.61	101.1	99.66	83.316	80.0938	75.5694	71.605	70.5605	80.6803	82.5905	82.9813	0.842862	0.832826	0.800618	0.755391	0.715763	0.705323	0.80648	0.825574	0.829481	0.199466	0.215628	0.259338	0.305375	0.349635	0.775467	0.786484	0.795208	0.0766885	0.335789	0.736907	1.13004	1.24097
	73.26	434.94	387.34	402.86	347.97	278.44	232.81	237.02	359.2	387.95	399.55	308.9	256.8	189.05	138.57	129.14	83.86	90.91	88.94	72.2904	70.3005	66.9242	63.9133	64.2265	70.7473	71.7953	72.1831	0.831563	0.820557	0.79797	0.759646	0.72547	0.729025	0.803042	0.814937	0.819339	0.233232	0.262005	0.321039	0.404794	0.455151	0.766537	0.765666	0.7774	0.0796306	0.249935	0.56206	0.868219	0.835035
	98.72	631.35	598.98	592.31	469.45	363.56	301.06	299.76	530.94	564.7	575.07	502.74	397.46	289.47	212.25	188.21	111.38	118.84	116.68	97.713	93.6689	88.5243	84.2648	84.1627	95.8846	96.9311	97.2321	0.843637	0.835031	0.800471	0.756507	0.720106	0.719233	0.819406	0.828349	0.830921	0.151221	0.15335	0.20379	0.294991	0.372131	0.790221	0.789552	0.797103	0.0659114	0.344872	0.736577	1.09709	1.10618
Day7	89.23	568.86	529.1	523.68	405.74	324.84	271.36	270.88	480.93	508.8	517.54	421.55	309.72	236.81	180.3	161.95	99.72	106.97	104.89	88.0386	83.9368	79.8242	76.1369	76.0991	86.7423	87.6079	87.8634	0.843142	0.831885	0.793127	0.754266	0.719425	0.719067	0.819636	0.827815	0.830229	0.195024	0.236654	0.270995	0.335569	0.402134	0.792652	0.78976	0.79733	0.0862741	0.402031	0.751201	1.09633	1.10004
	74.66	469.39	428.89	426.67	328.14	260.37	222.28	223.02	397.63	423.8	429.44	318.73	234.77	178.38	139.76	127.85	83.61	89.65	87.92	73.4896	69.8758	66.2062	63.4419	63.502	72.5767	73.404	73.5714	0.840942	0.82776	0.787055	0.745722	0.714586	0.715263	0.817477	0.826796	0.828681	0.252982	0.284543	0.314898	0.371243	0.426733	0.789729	0.788462	0.795268	0.100124	0.430457	0.802781	1.11171	1.1047
	92.33	574.97	534.12	522.42	412.82	330.67	267.29	252.87	469.56	519.1	530.5	410.43	311	244.24	190.85	170.29	101.83	108.18	108.71	90.8623	86.8519	82.5378	77.9256	76.6513	89.1174	90.7613	91.1036	0.839418	0.826074	0.789613	0.750392	0.70846	0.696875	0.810211	0.825156	0.828268	0.214368	0.246645	0.261378	0.285982	0.326571	0.783137	0.791601	0.79508	0.10059	0.392786	0.738803	1.15111	1.27378
	86.53	522.66	483.55	470.62	360.97	291.94	242.78	230.27	430.32	474.73	484.32	356.22	262.21	202.41	167.26	149.61	95.43	102.36	102.34	84.9744	80.5561	76.5184	72.662	71.4994	83.5614	85.1074	85.4106	0.834443	0.819442	0.776834	0.737897	0.700708	0.689497	0.805816	0.820725	0.823648	0.243084	0.273596	0.306673	0.311064	0.350284	0.778235	0.784383	0.788693	0.110578	0.447932	0.790299	1.15281	1.26977
	89.81	532.84	482.76	477.41	357.13	291.38	259.21	251.51	438.9	482.26	493.88	357.89	259.5	198.67	169.16	156.05	99.78	106.87	106.66	88.0862	82.9326	78.8033	76.2442	75.5637	86.6829	88.2499	88.6315	0.83145	0.815492	0.76778	0.729551	0.705859	0.69956	0.8025	0.817008	0.82054	0.250351	0.273374	0.318176	0.347402	0.379548	0.772659	0.778398	0.784037	0.116106	0.492006	0.828677	1.05563	1.11856
	81.6	357.53	308.77	339.41	325.36	297.72	229.1	190.53	241.53	292.99	317.04	285.58	268.64	243.46	182.54	144.64	90.42	100.87	100.99	80.6177	79.7992	78.0226	72.344	67.9974	73.5391	77.6939	79.2889	0.771767	0.762477	0.754736	0.737933	0.684225	0.643115	0.695528	0.734824	0.749909	0.158599	0.17433	0.182252	0.20323	0.240854	0.625637	0.655722	0.68146	0.0533868	0.0988751	0.200893	0.560585	0.876502
[truncated: 49 more columns]
