# Supplementary material for: Time-Series Chlorophyll Fluorescence Imaging Reveals Dynamic Photosynthetic Fingerprints of sos Mutants to Drought Stress
Source: Sensors (Basel). 2019 Jun 12;19(12):2649. doi: 10.3390/s19122649 (PMC6631407; doi:10.3390/s19122649)
Supplement: Supplementary file 1 [file sensors-19-02649-s001.zip › Additional file 5..xlsx]

## Sheet: ANOVA BY DAYS
	One Way ANOVA on Day 0								One Way ANOVA on Day 1								One Way ANOVA on Day 2								One Way ANOVA on Day 3								One Way ANOVA on Day 4								One Way ANOVA on Day 5								One Way ANOVA on Day 6
			square sum (SS)	df	mean square (MS)	F	p-value				square sum (SS)	df	mean square (MS)	F	p-value				square sum (SS)	df	mean square (MS)	F	p-value				square sum (SS)	df	mean square (MS)	F	p-value				square sum (SS)	df	mean square (MS)	F	p-value				square sum (SS)	df	mean square (MS)	F	p-value
	Fo	Between Groups	204.939	2	102.47	1.00815	0.375855		Fo	Between Groups	228.641	2	114.321	1.0124	0.374353		Fo	Between Groups	20.0327	2	10.0163	0.132984	0.875946		Fo	Between Groups	33.3989	2	16.6994	0.230808	0.795288		Fo	Between Groups	463.975	2	231.988	4.39258	0.022306		Fo	Between Groups	22.7502	2	11.3751	0.149045	0.862434		Fo
		Within Groups	3354.16	33	101.641					Within Groups	3726.37	33	112.92					Within Groups	2485.55	33	75.3198					Within Groups	2170.56	30	72.3521					Within Groups	1425.97	27	52.8136					Within Groups	1602.72	21	76.3199
		Total	3559.09	35						Total	3955.01	35						Total	2505.59	35						Total	2203.96	32						Total	1889.94	29						Total	1625.47	23
	Fm	Between Groups	1860.71	2	930.354	0.216973	0.806091		Fm	Between Groups	5856.87	2	2928.43	0.603248	0.552953		Fm	Between Groups	2634.07	2	1317.03	0.422914	0.658635		Fm	Between Groups	485.456	2	242.728	0.0781094	0.925051		Fm	Between Groups	14077.9	2	7038.97	3.09308	0.061729		Fm	Between Groups	1111.95	2	555.975	0.157608	0.855186		Fm
		Within Groups	141500	33	4287.88					Within Groups	160197	33	4854.44					Within Groups	102768	33	3114.19					Within Groups	93226.2	30	3107.54					Within Groups	61444.2	27	2275.71					Within Groups	74079.3	21	3527.59
		Total	143361	35						Total	166053	35						Total	105402	35						Total	93711.7	32						Total	75522.1	29						Total	75191.3	23
	Fp	Between Groups	3483.37	2	1741.68	0.43159	0.653089		Fp	Between Groups	8758.26	2	4379.13	0.956262	0.39472		Fp	Between Groups	1333.28	2	666.642	0.227098	0.798077		Fp	Between Groups	288.008	2	144.004	0.0489393	0.952315		Fp	Between Groups	9754.95	2	4877.47	2.13776	0.137452		Fp	Between Groups	1908.54	2	954.268	0.267756	0.767667		Fp
		Within Groups	133171	33	4035.5					Within Groups	151121	33	4579.42					Within Groups	96870.9	33	2935.48					Within Groups	88275.2	30	2942.51					Within Groups	61602.8	27	2281.58					Within Groups	74842.8	21	3563.94
		Total	136655	35						Total	159879	35						Total	98204.1	35						Total	88563.2	32						Total	71357.7	29						Total	76751.3	23
	Fm_L1	Between Groups	1885.5	2	942.75	0.249546	0.780611		Fm_L1	Between Groups	6877.32	2	3438.66	0.790171	0.462165		Fm_L1	Between Groups	2721.93	2	1360.96	0.496245	0.613283		Fm_L1	Between Groups	616.973	2	308.487	0.112498	0.893975		Fm_L1	Between Groups	10274	2	5136.98	2.68233	0.086587		Fm_L1	Between Groups	1766.89	2	883.446	0.284781	0.755037		Fm_L1
		Within Groups	124669	33	3777.86					Within Groups	143609	33	4351.79					Within Groups	90503.3	33	2742.53					Within Groups	82264.8	30	2742.16					Within Groups	51708.3	27	1915.12					Within Groups	65146	21	3102.19
		Total	126555	35						Total	150487	35						Total	93225.3	35						Total	82881.8	32						Total	61982.3	29						Total	66912.9	23
	Fm_L2	Between Groups	1959.51	2	979.754	0.399262	0.674011		Fm_L2	Between Groups	9754.91	2	4877.46	1.5243	0.232713		Fm_L2	Between Groups	21089.5	2	10544.7	5.89794	0.00645734		Fm_L2	Between Groups	3959.75	2	1979.87	1.20494	0.313802		Fm_L2	Between Groups	5402.66	2	2701.33	2.93672	0.070146		Fm_L2	Between Groups	871.3	2	435.65	0.254009	0.778033		Fm_L2
		Within Groups	80979.1	33	2453.91					Within Groups	105593	33	3199.8					Within Groups	58999.6	33	1787.87					Within Groups	49293.7	30	1643.12					Within Groups	24835.9	27	919.847					Within Groups	36017	21	1715.09
		Total	82938.6	35						Total	115348	35						Total	80089.1	35						Total	53253.5	32						Total	30238.5	29						Total	36888.3	23
	Fm_L3	Between Groups	9793.66	2	4896.83	3.3032	0.0492437		Fm_L3	Between Groups	4702.82	2	2351.41	1.16883	0.323263		Fm_L3	Between Groups	17737.4	2	8868.69	7.72777	0.00176731		Fm_L3	Between Groups	5037.72	2	2518.86	2.39418	0.10847		Fm_L3	Between Groups	7377.74	2	3688.87	6.15666	0.00626796		Fm_L3	Between Groups	581	2	290.5	0.294071	0.748243		Fm_L3
		Within Groups	48920.8	33	1482.45					Within Groups	66388.1	33	2011.76					Within Groups	37872.1	33	1147.64					Within Groups	31562.2	30	1052.07					Within Groups	16177.5	27	599.168					Within Groups	20745	21	987.858
		Total	58714.5	35						Total	71090.9	35						Total	55609.5	35						Total	36599.9	32						Total	23555.3	29						Total	21326	23
	Fm_L4	Between Groups	14834.5	2	7417.24	7.26819	0.0024241		Fm_L4	Between Groups	8863.55	2	4431.77	3.27426	0.0504464		Fm_L4	Between Groups	10308.7	2	5154.37	6.56883	0.00396793		Fm_L4	Between Groups	7241.35	2	3620.68	6.15835	0.00574302		Fm_L4	Between Groups	14826.8	2	7413.42	21.2171	2.89851e-06		Fm_L4	Between Groups	1828.29	2	914.145	1.60511	0.224552		Fm_L4
		Within Groups	33676.7	33	1020.51					Within Groups	44666.1	33	1353.52					Within Groups	25894.2	33	784.672					Within Groups	17637.9	30	587.929					Within Groups	9434.03	27	349.408					Within Groups	11960	21	569.523
		Total	48511.2	35						Total	53529.6	35						Total	36202.9	35						Total	24879.2	32						Total	24260.9	29						Total	13788.3	23
	Fm_Lss	Between Groups	6559.26	2	3279.63	4.65889	0.016514		Fm_Lss	Between Groups	4081.04	2	2040.52	2.0742	0.141732		Fm_Lss	Between Groups	3710.41	2	1855.2	3.1599	0.0555128		Fm_Lss	Between Groups	13964.4	2	6982.19	17.0625	1.12567e-05		Fm_Lss	Between Groups	25307.9	2	12654	43.9249	3.24825e-09		Fm_Lss	Between Groups	4602.73	2	2301.37	4.89569	0.0179803		Fm_Lss
		Within Groups	23230.3	33	703.95					Within Groups	32464.1	33	983.761					Within Groups	19374.6	33	587.108					Within Groups	12276.4	30	409.213					Within Groups	7778.2	27	288.081					Within Groups	9871.69	21	470.08
		Total	29789.6	35						Total	36545.2	35						Total	23085	35						Total	26240.8	32						Total	33086.1	29						Total	14474.4	23
	Fm_D1	Between Groups	5025.92	2	2512.96	1.02398	0.370292		Fm_D1	Between Groups	8236.75	2	4118.37	1.31009	0.283463		Fm_D1	Between Groups	1616.16	2	808.079	0.392518	0.678465		Fm_D1	Between Groups	24.1529	2	12.0764	0.00514842	0.994866		Fm_D1	Between Groups	7409.65	2	3704.83	2.17236	0.133411		Fm_D1	Between Groups	1153.12	2	576.561	0.236018	0.791833		Fm_D1
		Within Groups	80985.7	33	2454.11					Within Groups	103738	33	3143.59					Within Groups	67937.3	33	2058.71					Within Groups	70369.7	30	2345.66					Within Groups	46046.9	27	1705.44					Within Groups	51300.3	21	2442.87
		Total	86011.6	35						Total	111975	35						Total	69553.5	35						Total	70393.8	32						Total	53456.5	29						Total	52453.4	23
	Fm_D2	Between Groups	2033.74	2	1016.87	0.334346	0.718203		Fm_D2	Between Groups	7390.35	2	3695.17	1.0006	0.37854		Fm_D2	Between Groups	1694.52	2	847.26	0.347055	0.709315		Fm_D2	Between Groups	224.466	2	112.233	0.0448181	0.956235		Fm_D2	Between Groups	7656.18	2	3828.09	2.11115	0.140648		Fm_D2	Between Groups	732.297	2	366.148	0.134565	0.874844		Fm_D2
		Within Groups	100365	33	3041.37					Within Groups	121868	33	3692.96					Within Groups	80562.5	33	2441.29					Within Groups	75125.8	30	2504.19					Within Groups	48958.2	27	1813.27					Within Groups	57140.5	21	2720.97
		Total	102399	35						Total	129258	35						Total	82257	35						Total	75350.3	32						Total	56614.4	29						Total	57872.8	23
	Fm_D3	Between Groups	1945.27	2	972.633	0.293395	0.747653		Fm_D3	Between Groups	5928.79	2	2964.39	0.761054	0.475198		Fm_D3	Between Groups	2390.54	2	1195.27	0.467753	0.630498		Fm_D3	Between Groups	523.501	2	261.75	0.104181	0.901386		Fm_D3	Between Groups	10152.5	2	5076.25	2.72668	0.0834462		Fm_D3	Between Groups	429.703	2	214.852	0.0761525	0.92693		Fm_D3
		Within Groups	109398	33	3315.1					Within Groups	128539	33	3895.12					Within Groups	84326.3	33	2555.34					Within Groups	75373.4	30	2512.45					Within Groups	50265.9	27	1861.7					Within Groups	59248	21	2821.33
		Total	111344	35						Total	134468	35						Total	86716.8	35						Total	75896.9	32						Total	60418.4	29						Total	59677.7	23
	Ft_L1	Between Groups	2671.68	2	1335.84	0.359533	0.700702		Ft_L1	Between Groups	14321.8	2	7160.92	1.67906	0.202095		Ft_L1	Between Groups	1407.9	2	703.951	0.244976	0.784134		Ft_L1	Between Groups	585.829	2	292.915	0.0987142	0.906295		Ft_L1	Between Groups	3773.64	2	1886.82	0.930071	0.4068		Ft_L1	Between Groups	4233.92	2	2116.96	0.620279	0.54736		Ft_L1
		Within Groups	122611	33	3715.48					Within Groups	140739	33	4264.83					Within Groups	94827.1	33	2873.55					Within Groups	89018.9	30	2967.3					Within Groups	54774.4	27	2028.68					Within Groups	71671.3	21	3412.92
		Total	125283	35						Total	155061	35						Total	96235	35						Total	89604.8	32						Total	58548	29						Total	75905.2	23
	Ft_L2	Between Groups	2661.2	2	1330.6	0.52541	0.596177		Ft_L2	Between Groups	14233.7	2	7116.83	2.14823	0.132728		Ft_L2	Between Groups	12372.6	2	6186.32	3.21417	0.0530444		Ft_L2	Between Groups	1205.41	2	602.706	0.367164	0.695766		Ft_L2	Between Groups	1514.39	2	757.195	0.873105	0.429114		Ft_L2	Between Groups	781.731	2	390.865	0.204138	0.816949		Ft_L2
		Within Groups	83572.3	33	2532.49					Within Groups	109325	33	3312.88					Within Groups	63515.2	33	1924.7					Within Groups	49245.6	30	1641.52					Within Groups	23415.6	27	867.244					Within Groups	40208.9	21	1914.71
		Total	86233.5	35						Total	123559	35						Total	75887.8	35						Total	50451	32						Total	24930	29						Total	40990.6	23
	Ft_L3	Between Groups	7637.02	2	3818.51	2.63028	0.0871132		Ft_L3	Between Groups	8757.62	2	4378.81	2.25011	0.121317		Ft_L3	Between Groups	9054.27	2	4527.14	3.97133	0.0284823		Ft_L3	Between Groups	1181.06	2	590.528	0.58441	0.563655		Ft_L3	Between Groups	1345.44	2	672.721	1.27193	0.296554		Ft_L3	Between Groups	258.338	2	129.169	0.126426	0.881905		Ft_L3
		Within Groups	47907.8	33	1451.75					Within Groups	64219.3	33	1946.04					Within Groups	37618.5	33	1139.95					Within Groups	30314	30	1010.47					Within Groups	14280.3	27	528.899					Within Groups	21455.7	21	1021.7
		Total	55544.8	35						Total	72977	35						Total	46672.8	35						Total	31495.1	32						Total	15625.7	29						Total	21714	23
	Ft_L4	Between Groups	7558.63	2	3779.31	4.5106	0.018546		Ft_L4	Between Groups	7140.71	2	3570.36	3.33198	0.0480778		Ft_L4	Between Groups	3816.64	2	1908.32	2.7704	0.0772307		Ft_L4	Between Groups	726.556	2	363.278	0.663613	0.522384		Ft_L4	Between Groups	2223.05	2	1111.53	3.8176	0.0346674		Ft_L4	Between Groups	204.774	2	102.387	0.190919	0.827618		Ft_L4
		Within Groups	27649.8	33	837.874					Within Groups	35360.9	33	1071.54					Within Groups	22731.2	33	688.825					Within Groups	16422.7	30	547.424					Within Groups	7861.27	27	291.158					Within Groups	11262	21	536.285
		Total	35208.5	35						Total	42501.6	35						Total	26547.9	35						Total	17149.3	32						Total	10084.3	29						Total	11466.8	23
	Ft_Lss	Between Groups	2717.12	2	1358.56	2.69198	0.0826052		Ft_Lss	Between Groups	2954.07	2	1477.04	2.19029	0.127885		Ft_Lss	Between Groups	1737.15	2	868.573	1.81398	0.178883		Ft_Lss	Between Groups	1314.53	2	657.264	1.90195	0.166847		Ft_Lss	Between Groups	3525.09	2	1762.54	9.20361	0.000895829		Ft_Lss	Between Groups	324.502	2	162.251	0.415361	0.665407		Ft_Lss
		Within Groups	16654.1	33	504.67					Within Groups	22253.7	33	674.356					Within Groups	15801.1	33	478.821					Within Groups	10367.2	30	345.574					Within Groups	5170.66	27	191.506					Within Groups	8203.15	21	390.626
		Total	19371.2	35						Total	25207.8	35						Total	17538.2	35						Total	11681.8	32						Total	8695.74	29						Total	8527.65	23
	Ft_D1	Between Groups	362.574	2	181.287	1.29337	0.28789		Ft_D1	Between Groups	406.652	2	203.326	1.27924	0.291686		Ft_D1	Between Groups	132.462	2	66.2312	0.642725	0.532314		Ft_D1	Between Groups	43.1008	2	21.5504	0.221776	0.802397		Ft_D1	Between Groups	616.831	2	308.415	4.48475	0.0208112		Ft_D1	Between Groups	13.5244	2	6.76218	0.0661663	0.936169		Ft_D1
		Within Groups	4625.5	33	140.167					Within Groups	5245.1	33	158.942					Within Groups	3400.57	33	103.048					Within Groups	2915.16	30	97.1721					Within Groups	1856.79	27	68.7698					Within Groups	2146.19	21	102.2
		Total	4988.08	35						Total	5651.75	35						Total	3533.03	35						Total	2958.26	32						Total	2473.62	29						Total	2159.72	23
	Ft_D2	Between Groups	210.962	2	105.481	0.638572	0.534446		Ft_D2	Between Groups	390.331	2	195.166	1.07634	0.352505		Ft_D2	Between Groups	110.815	2	55.4075	0.445491	0.644305		Ft_D2	Between Groups	44.2402	2	22.1201	0.191382	0.826818		Ft_D2	Between Groups	699.358	2	349.679	4.24345	0.0249743		Ft_D2	Between Groups	31.5849	2	15.7925	0.134077	0.875265		Ft_D2
		Within Groups	5451.03	33	165.183					Within Groups	5983.66	33	181.323					Within Groups	4104.35	33	124.374					Within Groups	3467.43	30	115.581					Within Groups	2224.92	27	82.4045					Within Groups	2473.51	21	117.786
		Total	5661.99	35						Total	6373.99	35						Total	4215.16	35						Total	3511.67	32						Total	2924.28	29						Total	2505.1	23
	Ft_D3	Between Groups	215.678	2	107.839	0.670194	0.518435		Ft_D3	Between Groups	355.036	2	177.518	1.03189	0.367547		Ft_D3	Between Groups	97.7442	2	48.8721	0.414647	0.663967		Ft_D3	Between Groups	66.1718	2	33.0859	0.310059	0.735726		Ft_D3	Between Groups	676.718	2	338.359	4.40586	0.0220837		Ft_D3	Between Groups	18.6814	2	9.34072	0.0826108	0.921007		Ft_D3
		Within Groups	5309.93	33	160.907					Within Groups	5677.07	33	172.032					Within Groups	3889.52	33	117.864					Within Groups	3201.25	30	106.708					Within Groups	2073.53	27	76.7975					Within Groups	2374.45	21	113.069
		Total	5525.61	35						Total	6032.1	35						Total	3987.26	35						Total	3267.43	32						Total	2750.25	29						Total	2393.13	23
	Fo_L1	Between Groups	201.182	2	100.591	1.00975	0.375289		Fo_L1	Between Groups	232.349	2	116.174	1.04678	0.362431		Fo_L1	Between Groups	19.6346	2	9.81728	0.133047	0.875891		Fo_L1	Between Groups	32.8073	2	16.4037	0.231129	0.795037		Fo_L1	Between Groups	435.35	2	217.675	4.23821	0.0250739		Fo_L1	Between Groups	25.3403	2	12.6701	0.169236	0.84545		Fo_L1
		Within Groups	3287.46	33	99.6199					Within Groups	3662.41	33	110.982					Within Groups	2435	33	73.788					Within Groups	2129.16	30	70.9721					Within Groups	1386.72	27	51.3601					Within Groups	1572.21	21	74.8669
		Total	3488.64	35						Total	3894.76	35						Total	2454.64	35						Total	2161.97	32						Total	1822.07	29						Total	1597.55	23
	Fo_L2	Between Groups	124.559	2	62.2796	0.680693	0.513232		Fo_L2	Between Groups	250.034	2	125.017	1.19053	0.316782		Fo_L2	Between Groups	63.3287	2	31.6643	0.468831	0.629837		Fo_L2	Between Groups	51.0143	2	25.5071	0.395425	0.676852		Fo_L2	Between Groups	376.517	2	188.258	4.30991	0.0237451		Fo_L2	Between Groups	23.349	2	11.6745	0.176489	0.839438		Fo_L2
		Within Groups	3019.32	33	91.4945					Within Groups	3465.31	33	105.01					Within Groups	2228.78	33	67.5389					Within Groups	1935.17	30	64.5057					Within Groups	1179.37	27	43.6804					Within Groups	1389.12	21	66.1484
		Total	3143.88	35						Total	3715.35	35						Total	2292.11	35						Total	1986.19	32						Total	1555.89	29						Total	1412.47	23
	Fo_L3	Between Groups	82.1545	2	41.0772	0.504316	0.608497		Fo_L3	Between Groups	201.003	2	100.502	1.04992	0.361363		Fo_L3	Between Groups	107.882	2	53.9412	0.87821	0.425013		Fo_L3	Between Groups	76.7268	2	38.3634	0.655004	0.52671		Fo_L3	Between Groups	413.124	2	206.562	5.18851	0.012395		Fo_L3	Between Groups	16.0568	2	8.02838	0.137092	0.872664		Fo_L3
		Within Groups	2687.89	33	81.4513					Within Groups	3158.85	33	95.7228					Within Groups	2026.92	33	61.4217					Within Groups	1757.09	30	58.5697					Within Groups	1074.91	27	39.8115					Within Groups	1229.8	21	58.562
		Total	2770.05	35						Total	3359.86	35						Total	2134.8	35						Total	1833.82	32						Total	1488.03	29						Total	1245.86	23
	Fo_L4	Between Groups	104.184	2	52.092	0.71147	0.498298		Fo_L4	Between Groups	217.14	2	108.57	1.25595	0.298065		Fo_L4	Between Groups	93.4685	2	46.7342	0.840604	0.440479		Fo_L4	Between Groups	107.641	2	53.8204	1.08203	0.351769		Fo_L4	Between Groups	562.725	2	281.362	8.30394	0.00154626		Fo_L4	Between Groups	21.9915	2	10.9958	0.219346	0.80486		Fo_L4
		Within Groups	2416.18	33	73.2175					Within Groups	2852.68	33	86.4447					Within Groups	1834.67	33	55.596					Within Groups	1492.21	30	49.7403					Within Groups	914.84	27	33.883					Within Groups	1052.72	21	50.1297
		Total	2520.36	35						Total	3069.82	35						Total	1928.14	35						Total	1599.85	32						Total	1477.57	29						Total	1074.72	23
	Fo_Lss	Between Groups	96.2371	2	48.1186	0.737289	0.486124		Fo_Lss	Between Groups	158.6	2	79.3	1.00898	0.375563		Fo_Lss	Between Groups	38.9271	2	19.4635	0.38108	0.68609		Fo_Lss	Between Groups	142.805	2	71.4024	1.61993	0.214749		Fo_Lss	Between Groups	670.882	2	335.441	10.6826	0.000382144		Fo_Lss	Between Groups	52.9188	2	26.4594	0.570976	0.573503		Fo_Lss
		Within Groups	2153.72	33	65.2642					Within Groups	2593.62	33	78.5946					Within Groups	1685.46	33	51.0747					Within Groups	1322.32	30	44.0774					Within Groups	847.823	27	31.4008					Within Groups	973.154	21	46.3407
		Total	2249.95	35						Total	2752.22	35						Total	1724.39	35						Total	1465.13	32						Total	1518.7	29						Total	1026.07	23
	Fo_D1	Between Groups	210.985	2	105.492	1.15107	0.328671		Fo_D1	Between Groups	240.382	2	120.191	1.14655	0.330065		Fo_D1	Between Groups	20.02	2	10.01	0.142838	0.867427		Fo_D1	Between Groups	26.1417	2	13.0708	0.189429	0.828413		Fo_D1	Between Groups	417.514	2	208.757	4.14754	0.0268701		Fo_D1	Between Groups	23.9795	2	11.9897	0.16814	0.846362		Fo_D1
		Within Groups	3024.35	33	91.647					Within Groups	3459.34	33	104.828					Within Groups	2312.61	33	70.0792					Within Groups	2070.03	30	69.0012					Within Groups	1358.98	27	50.3327					Within Groups	1497.47	21	71.3081
		Total	3235.34	35						Total	3699.72	35						Total	2332.63	35						Total	2096.18	32						Total	1776.5	29						Total	1521.45	23
	Fo_D2	Between Groups	196.702	2	98.3509	1.02617	0.369531		Fo_D2	Between Groups	235.274	2	117.637	1.08961	0.348144		Fo_D2	Between Groups	19.1929	2	9.59647	0.132668	0.876221		Fo_D2	Between Groups	29.3814	2	14.6907	0.210171	0.811629		Fo_D2	Between Groups	421.628	2	210.814	4.14238	0.0269764		Fo_D2	Between Groups	20.1726	2	10.0863	0.137739	0.872107		Fo_D2
		Within Groups	3162.82	33	95.843					Within Groups	3562.77	33	107.963					Within Groups	2387.04	33	72.3345					Within Groups	2096.96	30	69.8987					Within Groups	1374.08	27	50.892					Within Groups	1537.78	21	73.2278
		Total	3359.52	35						Total	3798.04	35						Total	2406.23	35						Total	2126.34	32						Total	1795.71	29						Total	1557.96	23
	Fo_D3	Between Groups	198.955	2	99.4773	1.02123	0.371253		Fo_D3	Between Groups	226.615	2	113.308	1.0399	0.364784		Fo_D3	Between Groups	20.6496	2	10.3248	0.141576	0.868513		Fo_D3	Between Groups	32.7616	2	16.3808	0.234258	0.792591		Fo_D3	Between Groups	439.276	2	219.638	4.29454	0.0240234		Fo_D3	Between Groups	18.9429	2	9.47146	0.128495	0.880104		Fo_D3
		Within Groups	3214.51	33	97.4093					Within Groups	3595.67	33	108.96					Within Groups	2406.61	33	72.9274					Within Groups	2097.79	30	69.9265					Within Groups	1380.87	27	51.1435					Within Groups	1547.92	21	73.7106
		Total	3413.46	35						Total	3822.29	35						Total	2427.25	35						Total	2130.56	32						Total	1820.15	29						Total	1566.87	23
	QY_max	Between Groups	0.000247672	2	0.000123836	13.9928	3.97403e-05		QY_max	Between Groups	3.02985e-05	2	1.51493e-05	2.227	0.123811		QY_max	Between Groups	0.000103794	2	5.18969e-05	17.2843	7.32307e-06		QY_max	Between Groups	1.78275e-05	2	8.91377e-06	3.37252	0.0477352		QY_max	Between Groups	4.90299e-05	2	2.45149e-05	12.5502	0.000139976		QY_max	Between Groups	1.97829e-05	2	9.89143e-06	1.91272	0.172538		QY_max
		Within Groups	0.000292049	33	8.84997e-06					Within Groups	0.000224484	33	6.80254e-06					Within Groups	9.90841e-05	33	3.00255e-06					Within Groups	7.92918e-05	30	2.64306e-06					Within Groups	5.27404e-05	27	1.95335e-06					Within Groups	0.000108599	21	5.1714e-06
		Total	0.000539721	35						Total	0.000254782	35						Total	0.000202878	35						Total	9.71194e-05	32						Total	0.00010177	29						Total	0.000128382	23
	Fv_Fm_L1	Between Groups	0.000226471	2	0.000113235	11.119	0.000203492		Fv_Fm_L1	Between Groups	1.83421e-05	2	9.17106e-06	0.97321	0.38845		Fv_Fm_L1	Between Groups	0.00016158	2	8.07901e-05	19.271	2.85243e-06		Fv_Fm_L1	Between Groups	2.81915e-05	2	1.40958e-05	3.73934	0.0354858		Fv_Fm_L1	Between Groups	0.000171552	2	8.5776e-05	20.3115	4.14123e-06		Fv_Fm_L1	Between Groups	3.60089e-05	2	1.80045e-05	1.96797	0.164676		Fv_Fm_L1
		Within Groups	0.00033607	33	1.01839e-05					Within Groups	0.000310976	33	9.42351e-06					Within Groups	0.000138346	33	4.19231e-06					Within Groups	0.000113088	30	3.76958e-06					Within Groups	0.000114022	27	4.22302e-06					Within Groups	0.000192123	21	9.14872e-06
		Total	0.00056254	35						Total	0.000329318	35						Total	0.000299926	35						Total	0.000141279	32						Total	0.000285574	29						Total	0.000228132	23
	Fv_Fm_L2	Between Groups	0.0021188	2	0.0010594	38.2413	2.54853e-09		Fv_Fm_L2	Between Groups	0.000101159	2	5.05795e-05	2.55434	0.0930216		Fv_Fm_L2	Between Groups	0.00381718	2	0.00190859	91.5549	3.41467e-14		Fv_Fm_L2	Between Groups	0.000354647	2	0.000177323	11.2244	0.000229499		Fv_Fm_L2	Between Groups	4.7005e-05	2	2.35025e-05	0.635052	0.537639		Fv_Fm_L2	Between Groups	1.191e-05	2	5.95502e-06	0.140978	0.869323		Fv_Fm_L2
		Within Groups	0.0009142	33	2.7703e-05					Within Groups	0.000653445	33	1.98014e-05					Within Groups	0.000687932	33	2.08464e-05					Within Groups	0.00047394	30	1.5798e-05					Within Groups	0.000999235	27	3.70087e-05					Within Groups	0.000887055	21	4.22407e-05
		Total	0.003033	35						Total	0.000754604	35						Total	0.00450512	35						Total	0.000828586	32						Total	0.00104624	29						Total	0.000898965	23
	Fv_Fm_L3	Between Groups	0.0082797	2	0.00413985	77.4095	3.4576e-13		Fv_Fm_L3	Between Groups	0.000443591	2	0.000221796	12.478	9.21223e-05		Fv_Fm_L3	Between Groups	0.00619199	2	0.00309599	121.3	6.17818e-16		Fv_Fm_L3	Between Groups	0.00100614	2	0.000503068	24.7436	4.49117e-07		Fv_Fm_L3	Between Groups	0.00021905	2	0.000109525	3.63711	0.0399345		Fv_Fm_L3	Between Groups	0.000224758	2	0.000112379	2.61212	0.0970339		Fv_Fm_L3
		Within Groups	0.00176484	33	5.34799e-05					Within Groups	0.000586575	33	1.7775e-05					Within Groups	0.000842272	33	2.55234e-05					Within Groups	0.000609936	30	2.03312e-05					Within Groups	0.000813055	27	3.01131e-05					Within Groups	0.000903468	21	4.30223e-05
		Total	0.0100445	35						Total	0.00103017	35						Total	0.00703426	35						Total	0.00161607	32						Total	0.0010321	29						Total	0.00112823	23
	Fv_Fm_L4	Between Groups	0.0171407	2	0.00857033	133.909	1.45697e-16		Fv_Fm_L4	Between Groups	0.00322612	2	0.00161306	34.9643	7.05722e-09		Fv_Fm_L4	Between Groups	0.00453168	2	0.00226584	103.98	5.66776e-15		Fv_Fm_L4	Between Groups	0.00292024	2	0.00146012	51.7019	1.90239e-10		Fv_Fm_L4	Between Groups	0.00280366	2	0.00140183	33.45	4.92523e-08		Fv_Fm_L4	Between Groups	0.00141097	2	0.000705487	15.6739	6.83696e-05		Fv_Fm_L4
		Within Groups	0.00211203	33	6.4001e-05					Within Groups	0.00152244	33	4.61345e-05					Within Groups	0.000719109	33	2.17912e-05					Within Groups	0.000847234	30	2.82411e-05					Within Groups	0.00113152	27	4.19083e-05					Within Groups	0.000945214	21	4.50102e-05
		Total	0.0192527	35						Total	0.00474856	35						Total	0.00525079	35						Total	0.00376747	32						Total	0.00393518	29						Total	0.00235619	23
	Fv_Fm_Lss	Between Groups	0.00917847	2	0.00458924	50.412	9.2825e-11		Fv_Fm_Lss	Between Groups	0.0020602	2	0.0010301	13.364	5.60452e-05		Fv_Fm_Lss	Between Groups	0.0013837	2	0.000691848	13.8144	4.37804e-05		Fv_Fm_Lss	Between Groups	0.00573282	2	0.00286641	29.2061	9.10194e-08		Fv_Fm_Lss	Between Groups	0.00516337	2	0.00258169	25.3098	6.43879e-07		Fv_Fm_Lss	Between Groups	0.00283586	2	0.00141793	15.6553	6.88826e-05		Fv_Fm_Lss
		Within Groups	0.00300414	33	9.10345e-05					Within Groups	0.00254365	33	7.70803e-05					Within Groups	0.0016527	33	5.00817e-05					Within Groups	0.00294433	30	9.81442e-05					Within Groups	0.0027541	27	0.000102004					Within Groups	0.00190201	21	9.05719e-05
		Total	0.0121826	35						Total	0.00460385	35						Total	0.00303639	35						Total	0.00867715	32						Total	0.00791747	29						Total	0.00473787	23
	Fv_Fm_D1	Between Groups	0.000361439	2	0.00018072	9.88284	0.000433191		Fv_Fm_D1	Between Groups	3.11381e-05	2	1.55691e-05	1.70127	0.198065		Fv_Fm_D1	Between Groups	6.54119e-05	2	3.2706e-05	9.01942	0.000750097		Fv_Fm_D1	Between Groups	8.50236e-05	2	4.25118e-05	7.22934	0.00273824		Fv_Fm_D1	Between Groups	0.000128298	2	6.41489e-05	16.3247	2.25286e-05		Fv_Fm_D1	Between Groups	1.55179e-05	2	7.75896e-06	0.442883	0.648043		Fv_Fm_D1
		Within Groups	0.000603445	33	1.82862e-05					Within Groups	0.000301998	33	9.15144e-06					Within Groups	0.000119664	33	3.62617e-06					Within Groups	0.000176414	30	5.88045e-06					Within Groups	0.000106098	27	3.92957e-06					Within Groups	0.000367903	21	1.75192e-05
		Total	0.000964884	35						Total	0.000333136	35						Total	0.000185076	35						Total	0.000261437	32						Total	0.000234396	29						Total	0.000383421	23
	Fv_Fm_D2	Between Groups	0.000235891	2	0.000117946	12.1988	0.000108078		Fv_Fm_D2	Between Groups	3.50712e-06	2	1.75356e-06	0.210023	0.811641		Fv_Fm_D2	Between Groups	7.82025e-05	2	3.91012e-05	10.7454	0.000254772		Fv_Fm_D2	Between Groups	4.87403e-05	2	2.43702e-05	6.96756	0.00327071		Fv_Fm_D2	Between Groups	0.000121376	2	6.06881e-05	18.4179	9.01646e-06		Fv_Fm_D2	Between Groups	4.25721e-05	2	2.12861e-05	4.52971	0.0231477		Fv_Fm_D2
		Within Groups	0.000319065	33	9.66863e-06					Within Groups	0.000275529	33	8.34936e-06					Within Groups	0.000120083	33	3.63889e-06					Within Groups	0.00010493	30	3.49766e-06					Within Groups	8.89664e-05	27	3.29505e-06					Within Groups	9.86835e-05	21	4.69921e-06
		Total	0.000554956	35						Total	0.000279036	35						Total	0.000198286	35						Total	0.00015367	32						Total	0.000210343	29						Total	0.000141256	23
	Fv_Fm_D3	Between Groups	0.000211518	2	0.000105759	11.7644	0.000139001		Fv_Fm_D3	Between Groups	1.59739e-05	2	7.98696e-06	0.956455	0.394648		Fv_Fm_D3	Between Groups	0.000121866	2	6.09329e-05	17.5161	6.54169e-06		Fv_Fm_D3	Between Groups	1.68098e-05	2	8.40489e-06	3.08562	0.060446		Fv_Fm_D3	Between Groups	6.29268e-05	2	3.14634e-05	12.3889	0.00015222		Fv_Fm_D3	Between Groups	3.66055e-05	2	1.83027e-05	4.99986	0.0167512		Fv_Fm_D3
		Within Groups	0.000296661	33	8.98971e-06					Within Groups	0.000275569	33	8.35059e-06					Within Groups	0.000114796	33	3.47868e-06					Within Groups	8.17166e-05	30	2.72389e-06					Within Groups	6.85704e-05	27	2.53964e-06					Within Groups	7.68737e-05	21	3.66065e-06
		Total	0.000508178	35						Total	0.000291543	35						Total	0.000236662	35						Total	9.85264e-05	32						Total	0.000131497	29						Total	0.000113479	23
	QY_L1	Between Groups	0.00156231	2	0.000781156	1.33755	0.276346		QY_L1	Between Groups	0.00984625	2	0.00492313	12.1252	0.000112753		QY_L1	Between Groups	0.000132776	2	6.6388e-05	0.143825	0.866579		QY_L1	Between Groups	0.00393418	2	0.00196709	3.51624	0.0424696		QY_L1	Between Groups	0.00985696	2	0.00492848	8.31402	0.00153665		QY_L1	Between Groups	0.00407185	2	0.00203592	2.08313	0.149523		QY_L1
		Within Groups	0.0192726	33	0.000584019					Within Groups	0.0133988	33	0.000406023					Within Groups	0.0152324	33	0.000461588					Within Groups	0.0167829	30	0.000559431					Within Groups	0.0160054	27	0.000592792					Within Groups	0.0205241	21	0.00097734
		Total	0.0208349	35						Total	0.023245	35						Total	0.0153652	35						Total	0.0207171	32						Total	0.0258623	29						Total	0.024596	23
	QY_L2	Between Groups	0.01612	2	0.00805998	6.67518	0.00367792		QY_L2	Between Groups	0.00902134	2	0.00451067	3.64158	0.0372341		QY_L2	Between Groups	0.0162368	2	0.00811838	7.78104	0.00170441		QY_L2	Between Groups	0.00230402	2	0.00115201	1.71301	0.197491		QY_L2	Between Groups	0.00527014	2	0.00263507	5.18584	0.0124189		QY_L2	Between Groups	0.00264715	2	0.00132358	0.902865	0.420572		QY_L2
		Within Groups	0.039846	33	0.00120745					Within Groups	0.0408757	33	0.00123866					Within Groups	0.0344307	33	0.00104335					Within Groups	0.0201751	30	0.000672504					Within Groups	0.0137194	27	0.000508127					Within Groups	0.0307854	21	0.00146597
		Total	0.055966	35						Total	0.049897	35						Total	0.0506674	35						Total	0.0224791	32						Total	0.0189896	29						Total	0.0334326	23
	QY_L3	Between Groups	0.00685275	2	0.00342638	3.22658	0.0524966		QY_L3	Between Groups	0.0222921	2	0.0111461	11.2962	0.000183115		QY_L3	Between Groups	0.00117671	2	0.000588357	0.660345	0.523366		QY_L3	Between Groups	0.00500058	2	0.00250029	2.85028	0.073569		QY_L3	Between Groups	0.0103011	2	0.00515057	8.04175	0.00182059		QY_L3	Between Groups	0.00568061	2	0.0028403	2.06603	0.151673		QY_L3
		Within Groups	0.0350435	33	0.00106192					Within Groups	0.0325614	33	0.000986708					Within Groups	0.0294025	33	0.000890984					Within Groups	0.0263163	30	0.00087721					Within Groups	0.0172929	27	0.000640478					Within Groups	0.0288701	21	0.00137477
		Total	0.0418962	35						Total	0.0548535	35						Total	0.0305792	35						Total	0.0313169	32						Total	0.027594	29						Total	0.0345507	23
	QY_L4	Between Groups	0.00287009	2	0.00143505	0.947708	0.397925		QY_L4	Between Groups	0.0261904	2	0.0130952	9.61798	0.000511661		QY_L4	Between Groups	0.000729629	2	0.000364815	0.324059	0.725483		QY_L4	Between Groups	0.0139807	2	0.00699035	5.58086	0.00869796		QY_L4	Between Groups	0.0158483	2	0.00792417	9.44445	0.000776886		QY_L4	Between Groups	0.00743109	2	0.00371554	2.97461	0.0728729		QY_L4
		Within Groups	0.0499695	33	0.00151423					Within Groups	0.0449307	33	0.00136154					Within Groups	0.0371503	33	0.00112577					Within Groups	0.0375768	30	0.00125256					Within Groups	0.0226538	27	0.000839029					Within Groups	0.0262308	21	0.00124908
		Total	0.0528396	35						Total	0.0711211	35						Total	0.0378799	35						Total	0.0515575	32						Total	0.0385021	29						Total	0.0336619	23
	QY_Lss	Between Groups	0.00108603	2	0.000543013	0.371209	0.692744		QY_Lss	Between Groups	0.0198917	2	0.00994584	7.19089	0.00255794		QY_Lss	Between Groups	0.00125961	2	0.000629804	0.531607	0.592607		QY_Lss	Between Groups	0.0139023	2	0.00695117	5.15345	0.011916		QY_Lss	Between Groups	0.0131702	2	0.00658509	7.77263	0.00215735		QY_Lss	Between Groups	0.0158157	2	0.00790787	5.86772	0.00945393		QY_Lss
		Within Groups	0.0482732	33	0.00146282					Within Groups	0.0456428	33	0.00138312					Within Groups	0.0390957	33	0.00118472					Within Groups	0.0404652	30	0.00134884					Within Groups	0.0228748	27	0.000847215					Within Groups	0.0283015	21	0.00134769
		Total	0.0493592	35						Total	0.0655345	35						Total	0.0403553	35						Total	0.0543675	32						Total	0.036045	29						Total	0.0441173	23
	QY_D1	Between Groups	0.000556168	2	0.000278084	13.8959	4.18835e-05		QY_D1	Between Groups	7.64221e-06	2	3.8211e-06	0.296149	0.745632		QY_D1	Between Groups	0.000126702	2	6.33511e-05	7.61313	0.00191117		QY_D1	Between Groups	0.000150302	2	7.51509e-05	7.86862	0.00178966		QY_D1	Between Groups	0.000229664	2	0.000114832	21.1409	2.98577e-06		QY_D1	Between Groups	7.72823e-05	2	3.86412e-05	2.89176	0.0777484		QY_D1
		Within Groups	0.000660396	33	2.0012e-05					Within Groups	0.000425787	33	1.29026e-05					Within Groups	0.000274603	33	8.3213e-06					Within Groups	0.000286521	30	9.55071e-06					Within Groups	0.000146657	27	5.43175e-06					Within Groups	0.000280612	21	1.33625e-05
		Total	0.00121656	35						Total	0.00043343	35						Total	0.000401305	35						Total	0.000436823	32						Total	0.000376321	29						Total	0.000357895	23
	QY_D2	Between Groups	0.00012043	2	6.0215e-05	5.08621	0.0118734		QY_D2	Between Groups	4.31053e-05	2	2.15527e-05	1.72389	0.194047		QY_D2	Between Groups	0.000132007	2	6.60033e-05	5.33348	0.00983913		QY_D2	Between Groups	6.27586e-05	2	3.13793e-05	5.44341	0.00961765		QY_D2	Between Groups	0.000233045	2	0.000116523	18.3915	9.11805e-06		QY_D2	Between Groups	6.23062e-05	2	3.11531e-05	11.9116	0.000348753		QY_D2
		Within Groups	0.000390683	33	1.18389e-05					Within Groups	0.000412578	33	1.25024e-05					Within Groups	0.000408384	33	1.23753e-05					Within Groups	0.000172939	30	5.76464e-06					Within Groups	0.000171064	27	6.33569e-06					Within Groups	5.49224e-05	21	2.61535e-06
		Total	0.000511113	35						Total	0.000455683	35						Total	0.000540391	35						Total	0.000235698	32						Total	0.000404109	29						Total	0.000117229	23
	QY_D3	Between Groups	0.000126218	2	6.31089e-05	9.29463	0.000628424		QY_D3	Between Groups	7.07056e-05	2	3.53528e-05	3.07626	0.0595587		QY_D3	Between Groups	0.000176774	2	8.83871e-05	14.2765	3.41082e-05		QY_D3	Between Groups	5.13181e-05	2	2.5659e-05	4.42832	0.0206462		QY_D3	Between Groups	9.64314e-05	2	4.82157e-05	10.1824	0.000506714		QY_D3	Between Groups	3.58096e-05	2	1.79048e-05	4.90895	0.0178185		QY_D3
		Within Groups	0.000224064	33	6.78983e-06					Within Groups	0.000379241	33	1.14922e-05					Within Groups	0.000204306	33	6.19108e-06					Within Groups	0.000173829	30	5.7943e-06					Within Groups	0.000127851	27	4.73521e-06					Within Groups	7.6595e-05	21	3.64738e-06
		Total	0.000350282	35						Total	0.000449947	35						Total	0.00038108	35						Total	0.000225147	32						Total	0.000224282	29						Total	0.000112405	23
	NPQ_L1	Between Groups	0.000253831	2	0.000126915	7.35122	0.00228855		NPQ_L1	Between Groups	0.000987331	2	0.000493666	30.4333	3.22887e-08		NPQ_L1	Between Groups	0.000318248	2	0.000159124	8.39542	0.00112853		NPQ_L1	Between Groups	0.000476017	2	0.000238008	12.4075	0.000118396		NPQ_L1	Between Groups	0.00192262	2	0.000961311	18.3172	9.40956e-06		NPQ_L1	Between Groups	0.000647036	2	0.000323518	8.0003	0.00261282		NPQ_L1
		Within Groups	0.000569729	33	1.72645e-05					Within Groups	0.000535301	33	1.62212e-05					Within Groups	0.000625471	33	1.89537e-05					Within Groups	0.00057548	30	1.91827e-05					Within Groups	0.001417	27	5.24813e-05					Within Groups	0.000849202	21	4.04382e-05
		Total	0.00082356	35						Total	0.00152263	35						Total	0.000943719	35						Total	0.0010515	32						Total	0.00333962	29						Total	0.00149624	23
	NPQ_L2	Between Groups	0.0626971	2	0.0313485	44.8817	3.85338e-10		NPQ_L2	Between Groups	0.0142419	2	0.00712095	25.7057	1.86147e-07		NPQ_L2	Between Groups	0.163882	2	0.081941	95.9109	1.77886e-14		NPQ_L2	Between Groups	0.0340135	2	0.0170068	16.6406	1.37306e-05		NPQ_L2	Between Groups	0.000521392	2	0.000260696	0.102998	0.902481		NPQ_L2	Between Groups	0.00518828	2	0.00259414	1.2452	0.308286		NPQ_L2
		Within Groups	0.0230495	33	0.00069847					Within Groups	0.00914159	33	0.000277018					Within Groups	0.0281934	33	0.000854345					Within Groups	0.0306601	30	0.001022					Within Groups	0.0683391	27	0.00253108					Within Groups	0.0437496	21	0.00208331
		Total	0.0857466	35						Total	0.0233835	35						Total	0.192075	35						Total	0.0646736	32						Total	0.0688604	29						Total	0.0489378	23
	NPQ_L3	Between Groups	0.487765	2	0.243883	95.4855	1.89372e-14		NPQ_L3	Between Groups	0.0379472	2	0.0189736	38.5342	2.33369e-09		NPQ_L3	Between Groups	0.353834	2	0.176917	150.759	2.52671e-17		NPQ_L3	Between Groups	0.143626	2	0.0718131	50.7607	2.35433e-10		NPQ_L3	Between Groups	0.0604692	2	0.0302346	12.8754	0.000118392		NPQ_L3	Between Groups	0.0407812	2	0.0203906	7.00516	0.00466921		NPQ_L3
		Within Groups	0.0842864	33	0.00255413					Within Groups	0.0162486	33	0.000492383					Within Groups	0.0387257	33	0.00117351					Within Groups	0.0424421	30	0.00141474					Within Groups	0.0634027	27	0.00234825					Within Groups	0.0611267	21	0.0029108
		Total	0.572052	35						Total	0.0541958	35						Total	0.392559	35						Total	0.186068	32						Total	0.123872	29						Total	0.101908	23
	NPQ_L4	Between Groups	1.42728	2	0.713639	148.316	3.2212e-17		NPQ_L4	Between Groups	0.315116	2	0.157558	37.1896	3.5099e-09		NPQ_L4	Between Groups	0.272201	2	0.136101	93.2526	2.64023e-14		NPQ_L4	Between Groups	0.359213	2	0.179607	51.7251	1.89247e-10		NPQ_L4	Between Groups	0.423458	2	0.211729	42.5368	4.51975e-09		NPQ_L4	Between Groups	0.219945	2	0.109972	20.1496	1.30327e-05		NPQ_L4
		Within Groups	0.158784	33	0.00481163					Within Groups	0.139808	33	0.00423661					Within Groups	0.0481629	33	0.00145948					Within Groups	0.10417	30	0.00347233					Within Groups	0.134394	27	0.00497754					Within Groups	0.114614	21	0.0054578
		Total	1.58606	35						Total	0.454924	35						Total	0.320364	35						Total	0.463383	32						Total	0.557851	29						Total	0.334558	23
	NPQ_Lss	Between Groups	0.753703	2	0.376852	34.5697	8.01303e-09		NPQ_Lss	Between Groups	0.191491	2	0.0957454	11.5018	0.000162148		NPQ_Lss	Between Groups	0.0471866	2	0.0235933	4.96593	0.0130201		NPQ_Lss	Between Groups	0.609539	2	0.30477	26.8595	2.06278e-07		NPQ_Lss	Between Groups	0.60899	2	0.304495	25.4351	6.16451e-07		NPQ_Lss	Between Groups	0.410331	2	0.205165	18.3234	2.48405e-05		NPQ_Lss
		Within Groups	0.35974	33	0.0109012					Within Groups	0.274704	33	0.00832437					Within Groups	0.156784	33	0.00475104					Within Groups	0.340404	30	0.0113468					Within Groups	0.323229	27	0.0119715					Within Groups	0.235135	21	0.0111969
		Total	1.11344	35						Total	0.466195	35						Total	0.203971	35						Total	0.949943	32						Total	0.932219	29						Total	0.645466	23
	NPQ_D1	Between Groups	0.0304937	2	0.0152468	20.0208	2.02572e-06		NPQ_D1	Between Groups	0.00779284	2	0.00389642	9.13882	0.000694492		NPQ_D1	Between Groups	0.000873439	2	0.000436719	2.75825	0.0780385		NPQ_D1	Between Groups	0.00135066	2	0.000675331	7.96755	0.00167745		NPQ_D1	Between Groups	0.00179515	2	0.000897575	9.69639	0.000670396		NPQ_D1	Between Groups	0.000748985	2	0.000374493	0.626511	0.54415		NPQ_D1
		Within Groups	0.0251312	33	0.000761552					Within Groups	0.0140699	33	0.000426359					Within Groups	0.00522496	33	0.000158332					Within Groups	0.00254281	30	8.47602e-05					Within Groups	0.00249934	27	9.2568e-05					Within Groups	0.0125526	21	0.000597743
		Total	0.0556249	35						Total	0.0218627	35						Total	0.0060984	35						Total	0.00389347	32						Total	0.00429449	29						Total	0.0133016	23
	NPQ_D2	Between Groups	0.00333178	2	0.00166589	18.2661	4.56473e-06		NPQ_D2	Between Groups	0.00247636	2	0.00123818	33.6445	1.08341e-08		NPQ_D2	Between Groups	0.000259435	2	0.000129718	4.25996	0.0226072		NPQ_D2	Between Groups	0.00075399	2	0.000376995	19.0393	4.58846e-06		NPQ_D2	Between Groups	0.00211083	2	0.00105542	29.2033	1.77125e-07		NPQ_D2	Between Groups	0.000332226	2	0.000166113	3.64459	0.0437815		NPQ_D2
		Within Groups	0.00300964	33	9.12012e-05					Within Groups	0.00121446	33	3.68018e-05					Within Groups	0.00100486	33	3.04504e-05					Within Groups	0.000594028	30	1.98009e-05					Within Groups	0.000975789	27	3.61403e-05					Within Groups	0.000957137	21	4.5578e-05
		Total	0.00634142	35						Total	0.00369081	35						Total	0.0012643	35						Total	0.00134802	32						Total	0.00308662	29						Total	0.00128936	23
	NPQ_D3	Between Groups	0.00074351	2	0.000371755	7.40644	0.00220287		NPQ_D3	Between Groups	0.000527552	2	0.000263776	14.929	2.41287e-05		NPQ_D3	Between Groups	5.10643e-05	2	2.55321e-05	1.34457	0.274559		NPQ_D3	Between Groups	0.000266976	2	0.000133488	10.5373	0.000341786		NPQ_D3	Between Groups	0.000360687	2	0.000180343	11.7331	0.000215232		NPQ_D3	Between Groups	0.000680367	2	0.000340184	11.8004	0.000367452		NPQ_D3
		Within Groups	0.00165639	33	5.01935e-05					Within Groups	0.000583068	33	1.76687e-05					Within Groups	0.00062664	33	1.89891e-05					Within Groups	0.000380045	30	1.26682e-05					Within Groups	0.000415003	27	1.53705e-05					Within Groups	0.00060539	21	2.88281e-05
		Total	0.0023999	35						Total	0.00111062	35						Total	0.000677704	35						Total	0.000647021	32						Total	0.00077569	29						Total	0.00128576	23
	qN_L1	Between Groups	0.00024456	2	0.00012228	6.50528	0.00415272		qN_L1	Between Groups	0.00106721	2	0.000533604	28.5484	6.35005e-08		qN_L1	Between Groups	0.000369058	2	0.000184529	9.05685	0.000732174		qN_L1	Between Groups	0.000490777	2	0.000245388	12.2277	0.000130677		qN_L1	Between Groups	0.0018896	2	0.000944799	18.9082	7.33945e-06		qN_L1	Between Groups	0.000652484	2	0.000326242	7.6355	0.00322053		qN_L1
		Within Groups	0.000620304	33	1.87971e-05					Within Groups	0.00061681	33	1.86912e-05					Within Groups	0.000672359	33	2.03745e-05					Within Groups	0.000602046	30	2.00682e-05					Within Groups	0.00134913	27	4.99677e-05					Within Groups	0.000897266	21	4.2727e-05
		Total	0.000864864	35						Total	0.00168402	35						Total	0.00104142	35						Total	0.00109282	32						Total	0.00323873	29						Total	0.00154975	23
	qN_L2	Between Groups	0.0329675	2	0.0164837	51.8233	6.57801e-11		qN_L2	Between Groups	0.00827531	2	0.00413765	24.3097	3.24262e-07		qN_L2	Between Groups	0.0636555	2	0.0318277	84.6301	1.01849e-13		qN_L2	Between Groups	0.0107689	2	0.00538447	16.7433	1.30797e-05		qN_L2	Between Groups	0.000101821	2	5.09107e-05	0.103771	0.901789		qN_L2	Between Groups	0.00152941	2	0.000764704	1.1565	0.333828		qN_L2
		Within Groups	0.0104965	33	0.000318075					Within Groups	0.0056168	33	0.000170206					Within Groups	0.0124107	33	0.000376081					Within Groups	0.00964772	30	0.000321591					Within Groups	0.0132463	27	0.000490604					Within Groups	0.0138857	21	0.000661223
		Total	0.043464	35						Total	0.0138921	35						Total	0.0760661	35						Total	0.0204167	32						Total	0.0133481	29						Total	0.0154151	23
	qN_L3	Between Groups	0.0864635	2	0.0432317	117.358	9.97332e-16		qN_L3	Between Groups	0.00894742	2	0.00447371	38.0082	2.73443e-09		qN_L3	Between Groups	0.0506243	2	0.0253121	123.064	5.00882e-16		qN_L3	Between Groups	0.0160964	2	0.0080482	44.9836	9.3516e-10		qN_L3	Between Groups	0.00413833	2	0.00206916	10.6864	0.000381314		qN_L3	Between Groups	0.00399398	2	0.00199699	6.2079	0.00761741		qN_L3
		Within Groups	0.0121563	33	0.000368374					Within Groups	0.00388423	33	0.000117704					Within Groups	0.00678754	33	0.000205683					Within Groups	0.00536743	30	0.000178914					Within Groups	0.00522788	27	0.000193625					Within Groups	0.0067554	21	0.000321685
		Total	0.0986198	35						Total	0.0128317	35						Total	0.0574118	35						Total	0.0214638	32						Total	0.00936621	29						Total	0.0107494	23
	qN_L4	Between Groups	0.107796	2	0.0538981	148.058	3.30548e-17		qN_L4	Between Groups	0.0331455	2	0.0165728	36.754	4.01489e-09		qN_L4	Between Groups	0.0251388	2	0.0125694	93.6314	2.49432e-14		qN_L4	Between Groups	0.0228845	2	0.0114423	51.3274	2.07001e-10		qN_L4	Between Groups	0.020142	2	0.010071	38.6283	1.19953e-08		qN_L4	Between Groups	0.0103666	2	0.0051833	18.5016	2.32837e-05		qN_L4
		Within Groups	0.0120131	33	0.000364035					Within Groups	0.0148801	33	0.000450911					Within Groups	0.00443004	33	0.000134244					Within Groups	0.0066878	30	0.000222927					Within Groups	0.00703934	27	0.000260716					Within Groups	0.00588323	21	0.000280154
		Total	0.119809	35						Total	0.0480256	35						Total	0.0295689	35						Total	0.0295723	32						Total	0.0271814	29						Total	0.0162498	23
	qN_Lss	Between Groups	0.0501172	2	0.0250586	38.7011	2.21996e-09		qN_Lss	Between Groups	0.016674	2	0.008337	11.8887	0.000129294		qN_Lss	Between Groups	0.00536075	2	0.00268038	5.59232	0.00810035		qN_Lss	Between Groups	0.0506551	2	0.0253276	29.2172	9.06777e-08		qN_Lss	Between Groups	0.0442265	2	0.0221132	25.7886	5.45635e-07		qN_Lss	Between Groups	0.0201633	2	0.0100817	18.8033	2.08864e-05		qN_Lss
		Within Groups	0.0213672	33	0.00064749					Within Groups	0.0231413	33	0.000701253					Within Groups	0.0158168	33	0.000479296					Within Groups	0.0260062	30	0.000866872					Within Groups	0.0231519	27	0.00085748					Within Groups	0.0112594	21	0.000536164
		Total	0.0714844	35						Total	0.0398153	35						Total	0.0211775	35						Total	0.0766613	32						Total	0.0673784	29						Total	0.0314228	23
	qN_D1	Between Groups	0.01708	2	0.00853999	19.5871	2.46702e-06		qN_D1	Between Groups	0.00495958	2	0.00247979	8.92299	0.000798447		qN_D1	Between Groups	0.000587575	2	0.000293788	2.53862	0.0942974		qN_D1	Between Groups	0.00111732	2	0.000558658	8.26454	0.00138341		qN_D1	Between Groups	0.00146709	2	0.000733547	10.0545	0.000545128		qN_D1	Between Groups	0.000479836	2	0.000239918	0.587096	0.564808		qN_D1
		Within Groups	0.014388	33	0.000436					Within Groups	0.00917104	33	0.00027791					Within Groups	0.003819	33	0.000115727					Within Groups	0.00202791	30	6.75969e-05					Within Groups	0.00196983	27	7.29568e-05					Within Groups	0.00858169	21	0.000408652
		Total	0.031468	35						Total	0.0141306	35						Total	0.00440657	35						Total	0.00314522	32						Total	0.00343693	29						Total	0.00906153	23
	qN_D2	Between Groups	0.00250602	2	0.00125301	17.8919	5.45703e-06		qN_D2	Between Groups	0.00201313	2	0.00100656	32.917	1.37889e-08		qN_D2	Between Groups	0.000192316	2	9.6158e-05	3.57823	0.0392208		qN_D2	Between Groups	0.000682086	2	0.000341043	19.1678	4.33626e-06		qN_D2	Between Groups	0.00189502	2	0.000947511	28.9867	1.89708e-07		qN_D2	Between Groups	0.000311566	2	0.000155783	3.97403	0.0343795		qN_D2
		Within Groups	0.00231106	33	7.00321e-05					Within Groups	0.0010091	33	3.05789e-05					Within Groups	0.000886811	33	2.68731e-05					Within Groups	0.000533775	30	1.77925e-05					Within Groups	0.000882569	27	3.26877e-05					Within Groups	0.000823207	21	3.92004e-05
		Total	0.00481707	35						Total	0.00302223	35						Total	0.00107913	35						Total	0.00121586	32						Total	0.00277759	29						Total	0.00113477	23
	qN_D3	Between Groups	0.000582765	2	0.000291382	6.71216	0.00358244		qN_D3	Between Groups	0.000459678	2	0.000229839	13.9735	4.01582e-05		qN_D3	Between Groups	5.36207e-05	2	2.68103e-05	1.48546	0.241145		qN_D3	Between Groups	0.000245723	2	0.000122862	10.6448	0.000320901		qN_D3	Between Groups	0.000343789	2	0.000171895	11.7013	0.000218927		qN_D3	Between Groups	0.000655867	2	0.000327933	12.9047	0.000221212		qN_D3
		Within Groups	0.00143257	33	4.34111e-05					Within Groups	0.000542792	33	1.64482e-05					Within Groups	0.0005956	33	1.80485e-05					Within Groups	0.000346257	30	1.15419e-05					Within Groups	0.000396636	27	1.46902e-05					Within Groups	0.000533651	21	2.5412e-05
		Total	0.00201533	35						Total	0.00100247	35						Total	0.000649221	35						Total	0.000591981	32						Total	0.000740426	29						Total	0.00118952	23
	qP_L1	Between Groups	0.00202607	2	0.00101304	1.16367	0.324825		qP_L1	Between Groups	0.0142977	2	0.00714887	11.8746	0.000130362		qP_L1	Between Groups	0.000118094	2	5.9047e-05	0.0858887	0.917901		qP_L1	Between Groups	0.00594172	2	0.00297086	3.5793	0.040358		qP_L1	Between Groups	0.0153624	2	0.00768121	8.67624	0.00123032		qP_L1	Between Groups	0.00614262	2	0.00307131	2.06698	0.151552		qP_L1
		Within Groups	0.0287282	33	0.000870553					Within Groups	0.0198671	33	0.000602032					Within Groups	0.0226869	33	0.000687482					Within Groups	0.0249004	30	0.000830012					Within Groups	0.0239035	27	0.000885316					Within Groups	0.0312037	21	0.00148589
		Total	0.0307543	35						Total	0.0341648	35						Total	0.022805	35						Total	0.0308421	32						Total	0.0392659	29						Total	0.0373463	23
	qP_L2	Between Groups	0.0222565	2	0.0111283	5.85439	0.00666804		qP_L2	Between Groups	0.0144575	2	0.00722874	3.74938	0.0340951		qP_L2	Between Groups	0.023338	2	0.011669	6.92728	0.00307662		qP_L2	Between Groups	0.00298103	2	0.00149052	1.34383	0.276098		qP_L2	Between Groups	0.00947254	2	0.00473627	5.52573	0.00973638		qP_L2	Between Groups	0.00425366	2	0.00212683	0.879228	0.429837		qP_L2
		Within Groups	0.0627278	33	0.00190084					Within Groups	0.0636235	33	0.00192798					Within Groups	0.0555885	33	0.0016845					Within Groups	0.0332748	30	0.00110916					Within Groups	0.0231425	27	0.00085713					Within Groups	0.0507985	21	0.00241897
		Total	0.0849843	35						Total	0.0780809	35						Total	0.0789266	35						Total	0.0362558	32						Total	0.032615	29						Total	0.0550521	23
	qP_L3	Between Groups	0.0129224	2	0.00646122	3.33039	0.0481415		qP_L3	Between Groups	0.0367402	2	0.0183701	10.8385	0.000240819		qP_L3	Between Groups	0.0012875	2	0.00064375	0.389251	0.680634		qP_L3	Between Groups	0.0066314	2	0.0033157	2.04144	0.147494		qP_L3	Between Groups	0.0175111	2	0.00875553	7.20276	0.00311261		qP_L3	Between Groups	0.00901905	2	0.00450953	1.78561	0.192231		qP_L3
		Within Groups	0.0640226	33	0.00194008					Within Groups	0.0559313	33	0.00169489					Within Groups	0.054576	33	0.00165382					Within Groups	0.0487258	30	0.00162419					Within Groups	0.0328207	27	0.00121558					Within Groups	0.0530353	21	0.00252549
		Total	0.0769451	35						Total	0.0926715	35						Total	0.0558635	35						Total	0.0553572	32						Total	0.0503317	29						Total	0.0620543	23
	qP_L4	Between Groups	0.0131715	2	0.00658577	2.13412	0.134397		qP_L4	Between Groups	0.0467465	2	0.0233733	9.32024	0.000618215		qP_L4	Between Groups	0.00118596	2	0.000592982	0.280921	0.756875		qP_L4	Between Groups	0.0163114	2	0.00815572	3.62991	0.0387441		qP_L4	Between Groups	0.0194322	2	0.00971608	6.59186	0.00466372		qP_L4	Between Groups	0.0111803	2	0.00559015	2.44721	0.110825		qP_L4
		Within Groups	0.101836	33	0.00308595					Within Groups	0.0827572	33	0.0025078					Within Groups	0.0696579	33	0.00211085					Within Groups	0.0674042	30	0.00224681					Within Groups	0.0397967	27	0.00147395					Within Groups	0.0479701	21	0.00228429
		Total	0.115008	35						Total	0.129504	35						Total	0.0708439	35						Total	0.0837157	32						Total	0.0592288	29						Total	0.0591504	23
	qP_Lss	Between Groups	0.00848486	2	0.00424243	1.64576	0.208303		qP_Lss	Between Groups	0.031079	2	0.0155395	6.92189	0.00308833		qP_Lss	Between Groups	0.004418	2	0.002209	1.20875	0.311448		qP_Lss	Between Groups	0.0100274	2	0.00501371	2.63225	0.0884615		qP_Lss	Between Groups	0.00966489	2	0.00483244	4.50348	0.0205207		qP_Lss	Between Groups	0.021048	2	0.010524	4.91944	0.0176916		qP_Lss
		Within Groups	0.0850672	33	0.0025778					Within Groups	0.0740843	33	0.00224498					Within Groups	0.0603079	33	0.00182751					Within Groups	0.0571418	30	0.00190473					Within Groups	0.0289722	27	0.00107305					Within Groups	0.0449245	21	0.00213926
		Total	0.0935521	35						Total	0.105163	35						Total	0.0647259	35						Total	0.0671692	32						Total	0.0386371	29						Total	0.0659725	23
	qP_D1	Between Groups	6.15255e-05	2	3.07627e-05	3.67477	0.0362363		qP_D1	Between Groups	4.91248e-05	2	2.45624e-05	4.59573	0.017349		qP_D1	Between Groups	0.000217234	2	0.000108617	18.112	4.91194e-06		qP_D1	Between Groups	1.7188e-05	2	8.59401e-06	2.72882	0.0815026		qP_D1	Between Groups	2.83174e-05	2	1.41587e-05	4.96413	0.0145904		qP_D1	Between Groups	4.59302e-05	2	2.29651e-05	5.20524	0.0145888		qP_D1
		Within Groups	0.000276254	33	8.37134e-06					Within Groups	0.000176372	33	5.34461e-06					Within Groups	0.0001979	33	5.99698e-06					Within Groups	9.44805e-05	30	3.14935e-06					Within Groups	7.70095e-05	27	2.8522e-06					Within Groups	9.26503e-05	21	4.41192e-06
		Total	0.00033778	35						Total	0.000225497	35						Total	0.000415135	35						Total	0.000111669	32						Total	0.000105327	29						Total	0.000138581	23
	qP_D2	Between Groups	2.05503e-05	2	1.02751e-05	0.940101	0.400799		qP_D2	Between Groups	3.54543e-05	2	1.77271e-05	3.87529	0.0307802		qP_D2	Between Groups	0.000122829	2	6.14145e-05	5.68831	0.00754112		qP_D2	Between Groups	1.04297e-05	2	5.21487e-06	1.06647	0.356914		qP_D2	Between Groups	6.31794e-05	2	3.15897e-05	5.26925	0.0116943		qP_D2	Between Groups	4.07491e-06	2	2.03746e-06	0.301731	0.742689		qP_D2
		Within Groups	0.000360684	33	1.09298e-05					Within Groups	0.000150955	33	4.5744e-06					Within Groups	0.000356288	33	1.07966e-05					Within Groups	0.000146696	30	4.88986e-06					Within Groups	0.000161868	27	5.99511e-06					Within Groups	0.000141803	21	6.75254e-06
		Total	0.000381235	35						Total	0.000186409	35						Total	0.000479117	35						Total	0.000157125	32						Total	0.000225047	29						Total	0.000145878	23
	qP_D3	Between Groups	1.48561e-05	2	7.42806e-06	0.917344	0.409528		qP_D3	Between Groups	3.8614e-05	2	1.9307e-05	6.59215	0.00390232		qP_D3	Between Groups	9.1395e-05	2	4.56975e-05	10.3242	0.000329457		qP_D3	Between Groups	2.41937e-05	2	1.20969e-05	2.38884	0.108971		qP_D3	Between Groups	2.49158e-05	2	1.24579e-05	3.34899	0.0502061		qP_D3	Between Groups	3.49116e-06	2	1.74558e-06	0.4932	0.617567		qP_D3
		Within Groups	0.000267213	33	8.09736e-06					Within Groups	9.665e-05	33	2.92879e-06					Within Groups	0.000146067	33	4.42626e-06					Within Groups	0.000151918	30	5.06392e-06					Within Groups	0.000100437	27	3.71989e-06					Within Groups	7.43251e-05	21	3.53929e-06
		Total	0.000282069	35						Total	0.000135264	35						Total	0.000237462	35						Total	0.000176111	32						Total	0.000125353	29						Total	7.78163e-05	23
	qL_L1	Between Groups	0.0579082	2	0.0289541	2.36563	0.109624		qL_L1	Between Groups	0.261752	2	0.130876	13.8326	4.33482e-05		qL_L1	Between Groups	0.0112552	2	0.00562758	0.614029	0.547233		qL_L1	Between Groups	0.065934	2	0.032967	3.18405	0.0557198		qL_L1	Between Groups	0.115733	2	0.0578664	6.72203	0.00427437		qL_L1	Between Groups	0.0614831	2	0.0307416	2.34365	0.120575		qL_L1
		Within Groups	0.403903	33	0.0122395					Within Groups	0.312226	33	0.00946139					Within Groups	0.302445	33	0.009165					Within Groups	0.310614	30	0.0103538					Within Groups	0.232429	27	0.00860847					Within Groups	0.275456	21	0.013117
		Total	0.461811	35						Total	0.573978	35						Total	0.3137	35						Total	0.376548	32						Total	0.348162	29						Total	0.336939	23
	qL_L2	Between Groups	0.347316	2	0.173658	11.2081	0.000192958		qL_L2	Between Groups	0.112672	2	0.056336	3.59829	0.0385797		qL_L2	Between Groups	0.280951	2	0.140475	12.6877	8.17855e-05		qL_L2	Between Groups	0.0470086	2	0.0235043	3.26413	0.0521657		qL_L2	Between Groups	0.0433132	2	0.0216566	4.08128	0.0282698		qL_L2	Between Groups	0.0250941	2	0.012547	0.862016	0.436723		qL_L2
		Within Groups	0.5113	33	0.0154939					Within Groups	0.516659	33	0.0156563					Within Groups	0.365367	33	0.0110717					Within Groups	0.216024	30	0.00720078					Within Groups	0.143271	27	0.00530632					Within Groups	0.305665	21	0.0145555
		Total	0.858616	35						Total	0.629331	35						Total	0.646318	35						Total	0.263032	32						Total	0.186584	29						Total	0.330759	23
	qL_L3	Between Groups	0.113717	2	0.0568583	5.76346	0.0071319		qL_L3	Between Groups	0.293729	2	0.146865	14.2271	3.50248e-05		qL_L3	Between Groups	0.0665563	2	0.0332781	5.79452	0.00696971		qL_L3	Between Groups	0.0621586	2	0.0310793	5.87476	0.00703148		qL_L3	Between Groups	0.0640087	2	0.0320044	10.2331	0.000492294		qL_L3	Between Groups	0.0457058	2	0.0228529	3.0621	0.0680853		qL_L3
		Within Groups	0.325555	33	0.0098653					Within Groups	0.340655	33	0.0103229					Within Groups	0.18952	33	0.00574303					Within Groups	0.158709	30	0.00529031					Within Groups	0.0844435	27	0.00312754					Within Groups	0.156726	21	0.00746314
		Total	0.439272	35						Total	0.634384	35						Total	0.256076	35						Total	0.220868	32						Total	0.148452	29						Total	0.202432	23
	qL_L4	Between Groups	0.0963625	2	0.0481813	10.3815	0.000318046		qL_L4	Between Groups	0.158545	2	0.0792724	15.7025	1.61548e-05		qL_L4	Between Groups	0.0391065	2	0.0195533	7.09963	0.00272615		qL_L4	Between Groups	0.081303	2	0.0406515	11.8074	0.000165022		qL_L4	Between Groups	0.0700552	2	0.0350276	17.721	1.21472e-05		qL_L4	Between Groups	0.0373922	2	0.0186961	4.6014	0.0220195		qL_L4
		Within Groups	0.153155	33	0.00464105					Within Groups	0.166597	33	0.00504838					Within Groups	0.090886	33	0.00275412					Within Groups	0.103286	30	0.00344288					Within Groups	0.0533686	27	0.00197662					Within Groups	0.0853258	21	0.00406313
		Total	0.249517	35						Total	0.325141	35						Total	0.129993	35						Total	0.184589	32						Total	0.123424	29						Total	0.122718	23
	qL_Lss	Between Groups	0.0551721	2	0.0275861	11.1712	0.000197249		qL_Lss	Between Groups	0.0731421	2	0.036571	11.5371	0.00015881		qL_Lss	Between Groups	0.0104191	2	0.00520956	2.89425	0.0694832		qL_Lss	Between Groups	0.0808836	2	0.0404418	14.784	3.40121e-05		qL_Lss	Between Groups	0.0595959	2	0.029798	19.3278	6.16943e-06		qL_Lss	Between Groups	0.0560872	2	0.0280436	8.6116	0.00185724		qL_Lss
		Within Groups	0.0814896	33	0.00246938					Within Groups	0.104605	33	0.00316985					Within Groups	0.059399	33	0.00179997					Within Groups	0.0820656	30	0.00273552					Within Groups	0.0416264	27	0.00154172					Within Groups	0.0683863	21	0.00325649
		Total	0.136662	35						Total	0.177747	35						Total	0.0698181	35						Total	0.162949	32						Total	0.101222	29						Total	0.124473	23
	qL_D1	Between Groups	0.000191957	2	9.59785e-05	0.926803	0.405875		qL_D1	Between Groups	0.000710197	2	0.000355098	6.53306	0.00407083		qL_D1	Between Groups	0.00240264	2	0.00120132	22.8934	5.80764e-07		qL_D1	Between Groups	8.62942e-06	2	4.31471e-06	0.141894	0.868292		qL_D1	Between Groups	3.41194e-05	2	1.70597e-05	0.495798	0.614522		qL_D1	Between Groups	0.000319013	2	0.000159507	1.88908	0.176026		qL_D1
		Within Groups	0.00341744	33	0.000103559					Within Groups	0.00179368	33	5.4354e-05					Within Groups	0.00173166	33	5.24745e-05					Within Groups	0.000912242	30	3.04081e-05					Within Groups	0.000929031	27	3.44085e-05					Within Groups	0.00177316	21	8.44362e-05
		Total	0.00360939	35						Total	0.00250388	35						Total	0.0041343	35						Total	0.000920871	32						Total	0.00096315	29						Total	0.00209217	23
	qL_D2	Between Groups	0.00148996	2	0.000744979	5.25874	0.0104118		qL_D2	Between Groups	0.000205617	2	0.000102809	1.95948	0.156987		qL_D2	Between Groups	0.00147623	2	0.000738113	8.06545	0.00140646		qL_D2	Between Groups	0.000143414	2	7.17071e-05	1.15606	0.328349		qL_D2	Between Groups	0.00041183	2	0.000205915	2.81235	0.0777199		qL_D2	Between Groups	7.47707e-06	2	3.73853e-06	0.0309595	0.969559		qL_D2
		Within Groups	0.00467494	33	0.000141665					Within Groups	0.00173142	33	5.24673e-05					Within Groups	0.00302001	33	9.15154e-05					Within Groups	0.00186081	30	6.2027e-05					Within Groups	0.00197689	27	7.32181e-05					Within Groups	0.00253587	21	0.000120756
		Total	0.0061649	35						Total	0.00193704	35						Total	0.00449623	35						Total	0.00200422	32						Total	0.00238872	29						Total	0.00254335	23
	qL_D3	Between Groups	0.00109132	2	0.00054566	3.9409	0.0291901		qL_D3	Between Groups	0.000224369	2	0.000112185	3.0261	0.0621342		qL_D3	Between Groups	0.00118484	2	0.00059242	11.6788	0.00014614		qL_D3	Between Groups	0.00018678	2	9.339e-05	1.5247	0.23408		qL_D3	Between Groups	0.000262993	2	0.000131496	2.80379	0.0782726		qL_D3	Between Groups	0.000112585	2	5.62923e-05	0.916261	0.415419		qL_D3
		Within Groups	0.00456921	33	0.000138461					Within Groups	0.00122339	33	3.70724e-05					Within Groups	0.00167396	33	5.07262e-05					Within Groups	0.00183754	30	6.12513e-05					Within Groups	0.00126629	27	4.68995e-05					Within Groups	0.00129018	21	6.1437e-05
		Total	0.00566053	35						Total	0.00144776	35						Total	0.0028588	35						Total	0.00202432	32						Total	0.00152928	29						Total	0.00140276	23
	Rfd_L1	Between Groups	0.00135231	2	0.000676156	0.962479	0.392408		Rfd_L1	Between Groups	0.012683	2	0.00634148	9.82244	0.000449889		Rfd_L1	Between Groups	0.000480327	2	0.000240163	0.292031	0.748655		Rfd_L1	Between Groups	0.00648777	2	0.00324388	3.14965	0.0573252		Rfd_L1	Between Groups	0.0250979	2	0.012549	11.343	0.000265611		Rfd_L1	Between Groups	0.00963553	2	0.00481776	2.54541	0.102372		Rfd_L1
		Within Groups	0.023183	33	0.000702515					Within Groups	0.0213052	33	0.000645612					Within Groups	0.0271389	33	0.000822391					Within Groups	0.0308976	30	0.00102992					Within Groups	0.0298705	27	0.00110632					Within Groups	0.0397473	21	0.00189273
		Total	0.0245353	35						Total	0.0339881	35						Total	0.0276192	35						Total	0.0373853	32						Total	0.0549685	29						Total	0.0493828	23
	Rfd_L2	Between Groups	0.0694765	2	0.0347383	11.1812	0.000196082		Rfd_L2	Between Groups	0.0595872	2	0.0297936	6.98083	0.00296287		Rfd_L2	Between Groups	0.238888	2	0.119444	26.2534	1.50477e-07		Rfd_L2	Between Groups	0.0209871	2	0.0104935	2.65663	0.0866468		Rfd_L2	Between Groups	0.00831708	2	0.00415854	1.00814	0.378222		Rfd_L2	Between Groups	0.000840474	2	0.000420237	0.0735622	0.929317		Rfd_L2
		Within Groups	0.102526	33	0.00310685					Within Groups	0.140841	33	0.00426792					Within Groups	0.150139	33	0.00454965					Within Groups	0.118498	30	0.00394995					Within Groups	0.111374	27	0.00412496					Within Groups	0.119966	21	0.00571268
		Total	0.172003	35						Total	0.200428	35						Total	0.389026	35						Total	0.139486	32						Total	0.119691	29						Total	0.120807	23
	Rfd_L3	Between Groups	0.810201	2	0.405101	48.7609	1.40187e-10		Rfd_L3	Between Groups	0.11393	2	0.0569648	11.6912	0.000145083		Rfd_L3	Between Groups	0.545677	2	0.272839	30.5438	3.10593e-08		Rfd_L3	Between Groups	0.088413	2	0.0442065	4.75528	0.0160738		Rfd_L3	Between Groups	0.0146989	2	0.00734947	1.00856	0.378076		Rfd_L3	Between Groups	0.00223559	2	0.00111779	0.120937	0.886703		Rfd_L3
		Within Groups	0.274161	33	0.0083079					Within Groups	0.160791	33	0.00487245					Within Groups	0.294779	33	0.0089327					Within Groups	0.278889	30	0.00929629					Within Groups	0.196752	27	0.00728711					Within Groups	0.194099	21	0.0092428
		Total	1.08436	35						Total	0.27472	35						Total	0.840456	35						Total	0.367302	32						Total	0.211451	29						Total	0.196334	23
	Rfd_L4	Between Groups	3.01764	2	1.50882	55.9753	2.48516e-11		Rfd_L4	Between Groups	0.809989	2	0.404994	20.5938	1.56681e-06		Rfd_L4	Between Groups	0.585108	2	0.292554	19.5039	2.56287e-06		Rfd_L4	Between Groups	0.162326	2	0.081163	6.51137	0.00448073		Rfd_L4	Between Groups	0.280532	2	0.140266	15.7359	2.94877e-05		Rfd_L4	Between Groups	0.272128	2	0.136064	14.0303	0.000135086		Rfd_L4
		Within Groups	0.88952	33	0.0269552					Within Groups	0.648973	33	0.0196659					Within Groups	0.494994	33	0.0149998					Within Groups	0.373944	30	0.0124648					Within Groups	0.240672	27	0.00891379					Within Groups	0.203656	21	0.00969789
		Total	3.90716	35						Total	1.45896	35						Total	1.0801	35						Total	0.53627	32						Total	0.521205	29						Total	0.475784	23
	Rfd_Lss	Between Groups	2.09951	2	1.04975	43.4668	5.66182e-10		Rfd_Lss	Between Groups	0.40432	2	0.20216	12.1048	0.00011409		Rfd_Lss	Between Groups	0.310997	2	0.155498	18.1237	4.88456e-06		Rfd_Lss	Between Groups	0.442949	2	0.221474	39.1034	4.39542e-09		Rfd_Lss	Between Groups	0.690763	2	0.345381	64.3182	5.36924e-11		Rfd_Lss	Between Groups	0.43015	2	0.215075	28.5626	1.02093e-06		Rfd_Lss
		Within Groups	0.796972	33	0.0241507					Within Groups	0.551128	33	0.0167009					Within Groups	0.283135	33	0.00857984					Within Groups	0.169914	30	0.00566381					Within Groups	0.144987	27	0.00536989					Within Groups	0.158129	21	0.00752995
		Total	2.89648	35						Total	0.955448	35						Total	0.594131	35						Total	0.612863	32						Total	0.83575	29						Total	0.588279	23
	φNPQ_L1	Between Groups	0.000449878	2	0.000224939	2.51237	0.0964687		φNPQ_L1	Between Groups	2.75363e-05	2	1.37682e-05	0.239615	0.788288		φNPQ_L1	Between Groups	0.000271062	2	0.000135531	1.83289	0.175863		φNPQ_L1	Between Groups	0.00108626	2	0.00054313	4.0082	0.0286586		φNPQ_L1	Between Groups	0.00499377	2	0.00249689	10.863	0.000345657		φNPQ_L1	Between Groups	0.00164265	2	0.000821325	1.82873	0.185287		φNPQ_L1
		Within Groups	0.00295457	33	8.95325e-05					Within Groups	0.00189617	33	5.74596e-05					Within Groups	0.00244015	33	7.39441e-05					Within Groups	0.00406515	30	0.000135505					Within Groups	0.00620602	27	0.000229853					Within Groups	0.0094316	21	0.000449124
		Total	0.00340445	35						Total	0.0019237	35						Total	0.00271122	35						Total	0.0051514	32						Total	0.0111998	29						Total	0.0110742	23
	φNPQ_L2	Between Groups	0.00161029	2	0.000805145	2.18003	0.12905		φNPQ_L2	Between Groups	0.00237883	2	0.00118941	2.69093	0.0826803		φNPQ_L2	Between Groups	0.00617189	2	0.00308594	8.08984	0.00138362		φNPQ_L2	Between Groups	0.00010394	2	5.19698e-05	0.218502	0.804989		φNPQ_L2	Between Groups	0.00226635	2	0.00113317	6.60991	0.00460753		φNPQ_L2	Between Groups	0.000978676	2	0.000489338	0.772431	0.474573		φNPQ_L2
		Within Groups	0.0121878	33	0.000369328					Within Groups	0.0145863	33	0.000442009					Within Groups	0.0125882	33	0.000381459					Within Groups	0.00713537	30	0.000237846					Within Groups	0.00462876	27	0.000171435					Within Groups	0.0133036	21	0.000633504
		Total	0.0137981	35						Total	0.0169651	35						Total	0.01876	35						Total	0.00723931	32						Total	0.0068951	29						Total	0.0142823	23
	φNPQ_L3	Between Groups	0.00597431	2	0.00298715	8.76301	0.000886099		φNPQ_L3	Between Groups	0.0028286	2	0.0014143	4.84652	0.0142753		φNPQ_L3	Between Groups	0.00195751	2	0.000978757	2.25551	0.120742		φNPQ_L3	Between Groups	0.00115055	2	0.000575275	1.29004	0.290093		φNPQ_L3	Between Groups	0.00531732	2	0.00265866	7.15359	0.00321414		φNPQ_L3	Between Groups	0.00224702	2	0.00112351	1.40512	0.267476		φNPQ_L3
		Within Groups	0.0112491	33	0.000340882					Within Groups	0.00962998	33	0.000291817					Within Groups	0.0143201	33	0.000433941					Within Groups	0.0133781	30	0.000445936					Within Groups	0.0100346	27	0.000371654					Within Groups	0.0167912	21	0.000799583
		Total	0.0172234	35						Total	0.0124586	35						Total	0.0162776	35						Total	0.0145286	32						Total	0.015352	29						Total	0.0190383	23
	φNPQ_L4	Between Groups	0.00492345	2	0.00246172	2.31788	0.114306		φNPQ_L4	Between Groups	0.013302	2	0.00665102	7.59766	0.00193152		φNPQ_L4	Between Groups	0.000842774	2	0.000421387	0.520547	0.598994		φNPQ_L4	Between Groups	0.00674012	2	0.00337006	3.89884	0.0312493		φNPQ_L4	Between Groups	0.00958157	2	0.00479078	7.79551	0.00212626		φNPQ_L4	Between Groups	0.00463062	2	0.00231531	2.64858	0.0942453		φNPQ_L4
		Within Groups	0.0350479	33	0.00106206					Within Groups	0.0288883	33	0.000875403					Within Groups	0.0267138	33	0.000809508					Within Groups	0.0259312	30	0.000864374					Within Groups	0.016593	27	0.000614557					Within Groups	0.0183576	21	0.000874171
		Total	0.0399713	35						Total	0.0421903	35						Total	0.0275565	35						Total	0.0326713	32						Total	0.0261746	29						Total	0.0229882	23
	φNPQ_Lss	Between Groups	0.00251361	2	0.00125681	1.0786	0.351759		φNPQ_Lss	Between Groups	0.0115023	2	0.00575114	5.98507	0.00605661		φNPQ_Lss	Between Groups	0.00254854	2	0.00127427	1.47955	0.242456		φNPQ_Lss	Between Groups	0.00541068	2	0.00270534	2.94259	0.0680915		φNPQ_Lss	Between Groups	0.00604679	2	0.0030234	5.17943	0.0124766		φNPQ_Lss	Between Groups	0.0101113	2	0.00505564	5.14698	0.0151693		φNPQ_Lss
		Within Groups	0.0384524	33	0.00116522					Within Groups	0.0317101	33	0.000960914					Within Groups	0.0284213	33	0.000861253					Within Groups	0.0275812	30	0.000919374					Within Groups	0.0157607	27	0.000583731					Within Groups	0.0206273	21	0.000982253
		Total	0.040966	35						Total	0.0432124	35						Total	0.0309699	35						Total	0.0329919	32						Total	0.0218075	29						Total	0.0307386	23
	φNPQ_D1	Between Groups	9.03301e-05	2	4.5165e-05	3.75105	0.0340486		φNPQ_D1	Between Groups	4.67426e-05	2	2.33713e-05	2.96898	0.0652115		φNPQ_D1	Between Groups	0.000286343	2	0.000143171	17.6953	5.99845e-06		φNPQ_D1	Between Groups	2.93118e-05	2	1.46559e-05	3.10882	0.059295		φNPQ_D1	Between Groups	4.7028e-05	2	2.3514e-05	5.6184	0.0091182		φNPQ_D1	Between Groups	7.10419e-05	2	3.5521e-05	5.25696	0.0140937		φNPQ_D1
		Within Groups	0.00039734	33	1.20406e-05					Within Groups	0.00025977	33	7.87183e-06					Within Groups	0.000267001	33	8.09092e-06					Within Groups	0.000141429	30	4.7143e-06					Within Groups	0.000113	27	4.18518e-06					Within Groups	0.000141896	21	6.75693e-06
		Total	0.000487671	35						Total	0.000306513	35						Total	0.000553343	35						Total	0.000170741	32						Total	0.000160028	29						Total	0.000212938	23
	φNPQ_D2	Between Groups	4.87864e-05	2	2.43932e-05	1.61398	0.214415		φNPQ_D2	Between Groups	4.55655e-05	2	2.27828e-05	3.97476	0.0284036		φNPQ_D2	Between Groups	0.000158563	2	7.92815e-05	5.83873	0.00674561		φNPQ_D2	Between Groups	1.15347e-05	2	5.76736e-06	0.84204	0.44076		φNPQ_D2	Between Groups	9.53859e-05	2	4.76929e-05	5.78402	0.00811592		φNPQ_D2	Between Groups	4.84879e-06	2	2.4244e-06	0.238672	0.78978		φNPQ_D2
		Within Groups	0.000498752	33	1.51137e-05					Within Groups	0.000189151	33	5.73186e-06					Within Groups	0.000448093	33	1.35786e-05					Within Groups	0.000205478	30	6.84927e-06					Within Groups	0.000222632	27	8.24563e-06					Within Groups	0.000213315	21	1.01578e-05
		Total	0.000547538	35						Total	0.000234717	35						Total	0.000606656	35						Total	0.000217013	32						Total	0.000318018	29						Total	0.000218163	23
	φNPQ_D3	Between Groups	3.78902e-05	2	1.89451e-05	1.58594	0.219966		φNPQ_D3	Between Groups	5.01767e-05	2	2.50883e-05	6.60728	0.00386037		φNPQ_D3	Between Groups	0.000117041	2	5.85204e-05	10.0187	0.000397984		φNPQ_D3	Between Groups	2.89541e-05	2	1.44771e-05	1.96108	0.158331		φNPQ_D3	Between Groups	3.82972e-05	2	1.91486e-05	3.58122	0.0417351		φNPQ_D3	Between Groups	3.25438e-06	2	1.62719e-06	0.295864	0.746938		φNPQ_D3
		Within Groups	0.000394206	33	1.19456e-05					Within Groups	0.000125303	33	3.79707e-06					Within Groups	0.000192756	33	5.8411e-06					Within Groups	0.000221465	30	7.38218e-06					Within Groups	0.000144368	27	5.34695e-06					Within Groups	0.000115496	21	5.49979e-06
		Total	0.000432096	35						Total	0.00017548	35						Total	0.000309797	35						Total	0.00025042	32						Total	0.000182665	29						Total	0.00011875	23
	φNO_L1	Between Groups	0.00303583	2	0.00151792	4.81486	0.0146293		φNO_L1	Between Groups	0.0104049	2	0.00520243	16.6941	9.79425e-06		φNO_L1	Between Groups	0.000781322	2	0.000390661	2.05767	0.143829		φNO_L1	Between Groups	0.000886303	2	0.000443151	2.61558	0.0897255		φNO_L1	Between Groups	0.000831289	2	0.000415645	4.14892	0.0268417		φNO_L1	Between Groups	0.000640414	2	0.000320207	2.37333	0.117688		φNO_L1
		Within Groups	0.0104035	33	0.000315257					Within Groups	0.0102839	33	0.000311632					Within Groups	0.00626523	33	0.000189856					Within Groups	0.00508283	30	0.000169428					Within Groups	0.0027049	27	0.000100181					Within Groups	0.0028333	21	0.000134919
		Total	0.0134393	35						Total	0.0206887	35						Total	0.00704656	35						Total	0.00596914	32						Total	0.00353619	29						Total	0.00347371	23
	φNO_L2	Between Groups	0.0143677	2	0.00718383	19.1069	3.07736e-06		φNO_L2	Between Groups	0.00213623	2	0.00106812	3.6971	0.0355809		φNO_L2	Between Groups	0.00954308	2	0.00477154	22.2265	7.69756e-07		φNO_L2	Between Groups	0.00149834	2	0.00074917	5.10252	0.0123768		φNO_L2	Between Groups	0.000624828	2	0.000312414	2.3897	0.110775		φNO_L2	Between Groups	0.000406944	2	0.000203472	0.672094	0.521284		φNO_L2
		Within Groups	0.0124074	33	0.000375982					Within Groups	0.00953391	33	0.000288906					Within Groups	0.00708438	33	0.000214678					Within Groups	0.0044047	30	0.000146823					Within Groups	0.0035298	27	0.000130734					Within Groups	0.00635761	21	0.000302743
		Total	0.0267751	35						Total	0.0116701	35						Total	0.0166275	35						Total	0.00590305	32						Total	0.00415463	29						Total	0.00676456	23
	φNO_L3	Between Groups	0.00730086	2	0.00365043	13.8939	4.19291e-05		φNO_L3	Between Groups	0.0103106	2	0.00515529	17.8516	5.56357e-06		φNO_L3	Between Groups	0.00384388	2	0.00192194	18.8168	3.52204e-06		φNO_L3	Between Groups	0.00146606	2	0.00073303	8.22574	0.00141849		φNO_L3	Between Groups	0.000816791	2	0.000408395	8.61487	0.00127723		φNO_L3	Between Groups	0.000807813	2	0.000403907	3.43636	0.0511587		φNO_L3
		Within Groups	0.00867031	33	0.000262737					Within Groups	0.00952991	33	0.000288785					Within Groups	0.00337061	33	0.00010214					Within Groups	0.00267343	30	8.91142e-05					Within Groups	0.00127996	27	4.74059e-05					Within Groups	0.00246832	21	0.000117539
		Total	0.0159712	35						Total	0.0198405	35						Total	0.00721449	35						Total	0.00413949	32						Total	0.00209675	29						Total	0.00327613	23
	φNO_L4	Between Groups	0.00375851	2	0.00187925	30.3335	3.34422e-08		φNO_L4	Between Groups	0.00353938	2	0.00176969	21.9872	8.5265e-07		φNO_L4	Between Groups	0.00167535	2	0.000837673	23.0893	5.35121e-07		φNO_L4	Between Groups	0.00131358	2	0.000656788	15.2869	2.64574e-05		φNO_L4	Between Groups	0.000784988	2	0.000392494	17.2182	1.51241e-05		φNO_L4	Between Groups	0.000383853	2	0.000191927	4.22323	0.028738		φNO_L4
		Within Groups	0.00204445	33	6.1953e-05					Within Groups	0.00265608	33	8.04874e-05					Within Groups	0.00119723	33	3.62797e-05					Within Groups	0.00128892	30	4.29641e-05					Within Groups	0.000615474	27	2.27953e-05					Within Groups	0.000954356	21	4.54455e-05
		Total	0.00580296	35						Total	0.00619546	35						Total	0.00287258	35						Total	0.0026025	32						Total	0.00140046	29						Total	0.00133821	23
	φNO_Lss	Between Groups	0.00199484	2	0.000997422	28.5615	6.31956e-08		φNO_Lss	Between Groups	0.00149694	2	0.00074847	13.4777	5.26395e-05		φNO_Lss	Between Groups	0.000629702	2	0.000314851	8.68228	0.00093415		φNO_Lss	Between Groups	0.00197526	2	0.000987631	20.862	2.0982e-06		φNO_Lss	Between Groups	0.00137406	2	0.000687029	22.1994	1.98878e-06		φNO_Lss	Between Groups	0.000688962	2	0.000344481	8.42936	0.00205381		φNO_Lss
		Within Groups	0.00115242	33	3.49219e-05					Within Groups	0.00183262	33	5.5534e-05					Within Groups	0.0011967	33	3.62636e-05					Within Groups	0.00142023	30	4.73411e-05					Within Groups	0.000835599	27	3.09481e-05					Within Groups	0.000858203	21	4.08668e-05
		Total	0.00314726	35						Total	0.00332956	35						Total	0.0018264	35						Total	0.0033955	32						Total	0.00220966	29						Total	0.00154717	23
	φNO_D1	Between Groups	0.000199118	2	9.95588e-05	6.07069	0.00568846		φNO_D1	Between Groups	3.24896e-05	2	1.62448e-05	1.96547	0.156149		φNO_D1	Between Groups	0.000132243	2	6.61217e-05	18.4155	4.25286e-06		φNO_D1	Between Groups	4.68641e-05	2	2.34321e-05	4.86109	0.0148362		φNO_D1	Between Groups	7.61681e-05	2	3.8084e-05	9.77031	0.000642209		φNO_D1	Between Groups	8.94744e-06	2	4.47372e-06	0.265132	0.769635		φNO_D1
		Within Groups	0.000541197	33	1.63999e-05					Within Groups	0.000272748	33	8.26508e-06					Within Groups	0.000118488	33	3.59054e-06					Within Groups	0.00014461	30	4.82033e-06					Within Groups	0.000105244	27	3.89794e-06					Within Groups	0.000354345	21	1.68736e-05
		Total	0.000740314	35						Total	0.000305237	35						Total	0.000250731	35						Total	0.000191474	32						Total	0.000181412	29						Total	0.000363293	23
	φNO_D2	Between Groups	0.000299239	2	0.00014962	11.4543	0.000166757		φNO_D2	Between Groups	3.28327e-07	2	1.64164e-07	0.0195671	0.980634		φNO_D2	Between Groups	0.000110507	2	5.52533e-05	13.3783	5.56054e-05		φNO_D2	Between Groups	4.00603e-05	2	2.00302e-05	4.44138	0.0204392		φNO_D2	Between Groups	8.8456e-05	2	4.4228e-05	10.449	0.000435632		φNO_D2	Between Groups	3.24393e-05	2	1.62197e-05	1.83303	0.184609		φNO_D2
		Within Groups	0.000431056	33	1.30623e-05					Within Groups	0.000276863	33	8.38978e-06					Within Groups	0.000136292	33	4.13007e-06					Within Groups	0.000135297	30	4.5099e-06					Within Groups	0.000114284	27	4.23274e-06					Within Groups	0.000185819	21	8.84853e-06
		Total	0.000730295	35						Total	0.000277191	35						Total	0.000246799	35						Total	0.000175357	32						Total	0.00020274	29						Total	0.000218258	23
	φNO_D3	Between Groups	0.00027443	2	0.000137215	10.0691	0.000385704		φNO_D3	Between Groups	1.05042e-05	2	5.2521e-06	0.63534	0.536111		φNO_D3	Between Groups	0.000137331	2	6.86653e-05	16.5299	1.06297e-05		φNO_D3	Between Groups	1.05718e-05	2	5.2859e-06	1.42408	0.256538		φNO_D3	Between Groups	5.9166e-05	2	2.9583e-05	9.34644	0.000823106		φNO_D3	Between Groups	3.47973e-05	2	1.73987e-05	3.01444	0.0706493		φNO_D3
		Within Groups	0.0004497	33	1.36273e-05					Within Groups	0.000272798	33	8.2666e-06					Within Groups	0.000137082	33	4.15401e-06					Within Groups	0.000111354	30	3.71179e-06					Within Groups	8.54593e-05	27	3.16516e-06					Within Groups	0.000121207	21	5.77177e-06
		Total	0.000724131	35						Total	0.000283302	35						Total	0.000274413	35						Total	0.000121925	32						Total	0.000144625	29						Total	0.000156004	23
	Fv_Fm	Between Groups	0.327238	2	0.163619	13.7885	4.44019e-05		Fv_Fm	Between Groups	0.0438546	2	0.0219273	2.24983	0.121347		Fv_Fm	Between Groups	0.13939	2	0.0696951	17.0534	8.20029e-06		Fv_Fm	Between Groups	0.026231	2	0.0131155	3.38582	0.0472198		Fv_Fm	Between Groups	0.073062	2	0.036531	12.7018	0.000129432		Fv_Fm	Between Groups	0.0299241	2	0.0149621	1.9394	0.168692		Fv_Fm
		Within Groups	0.391589	33	0.0118663					Within Groups	0.321624	33	0.00974619					Within Groups	0.134867	33	0.00408687					Within Groups	0.11621	30	0.00387365					Within Groups	0.0776534	27	0.00287605					Within Groups	0.162011	21	0.00771479
		Total	0.718827	35						Total	0.365479	35						Total	0.274257	35						Total	0.142441	32						Total	0.150715	29						Total	0.191935	23
[truncated: 13 more columns]
